# Supplementary material for: Systematic Review of the Literature on Dental Caries and Periodontal Disease in Socio-Economically Disadvantaged Individuals
Source: MDPI journal article supplement (doi:10.3390/ijerph182312360), 2021-11-24

Prisoners and caries prevalence

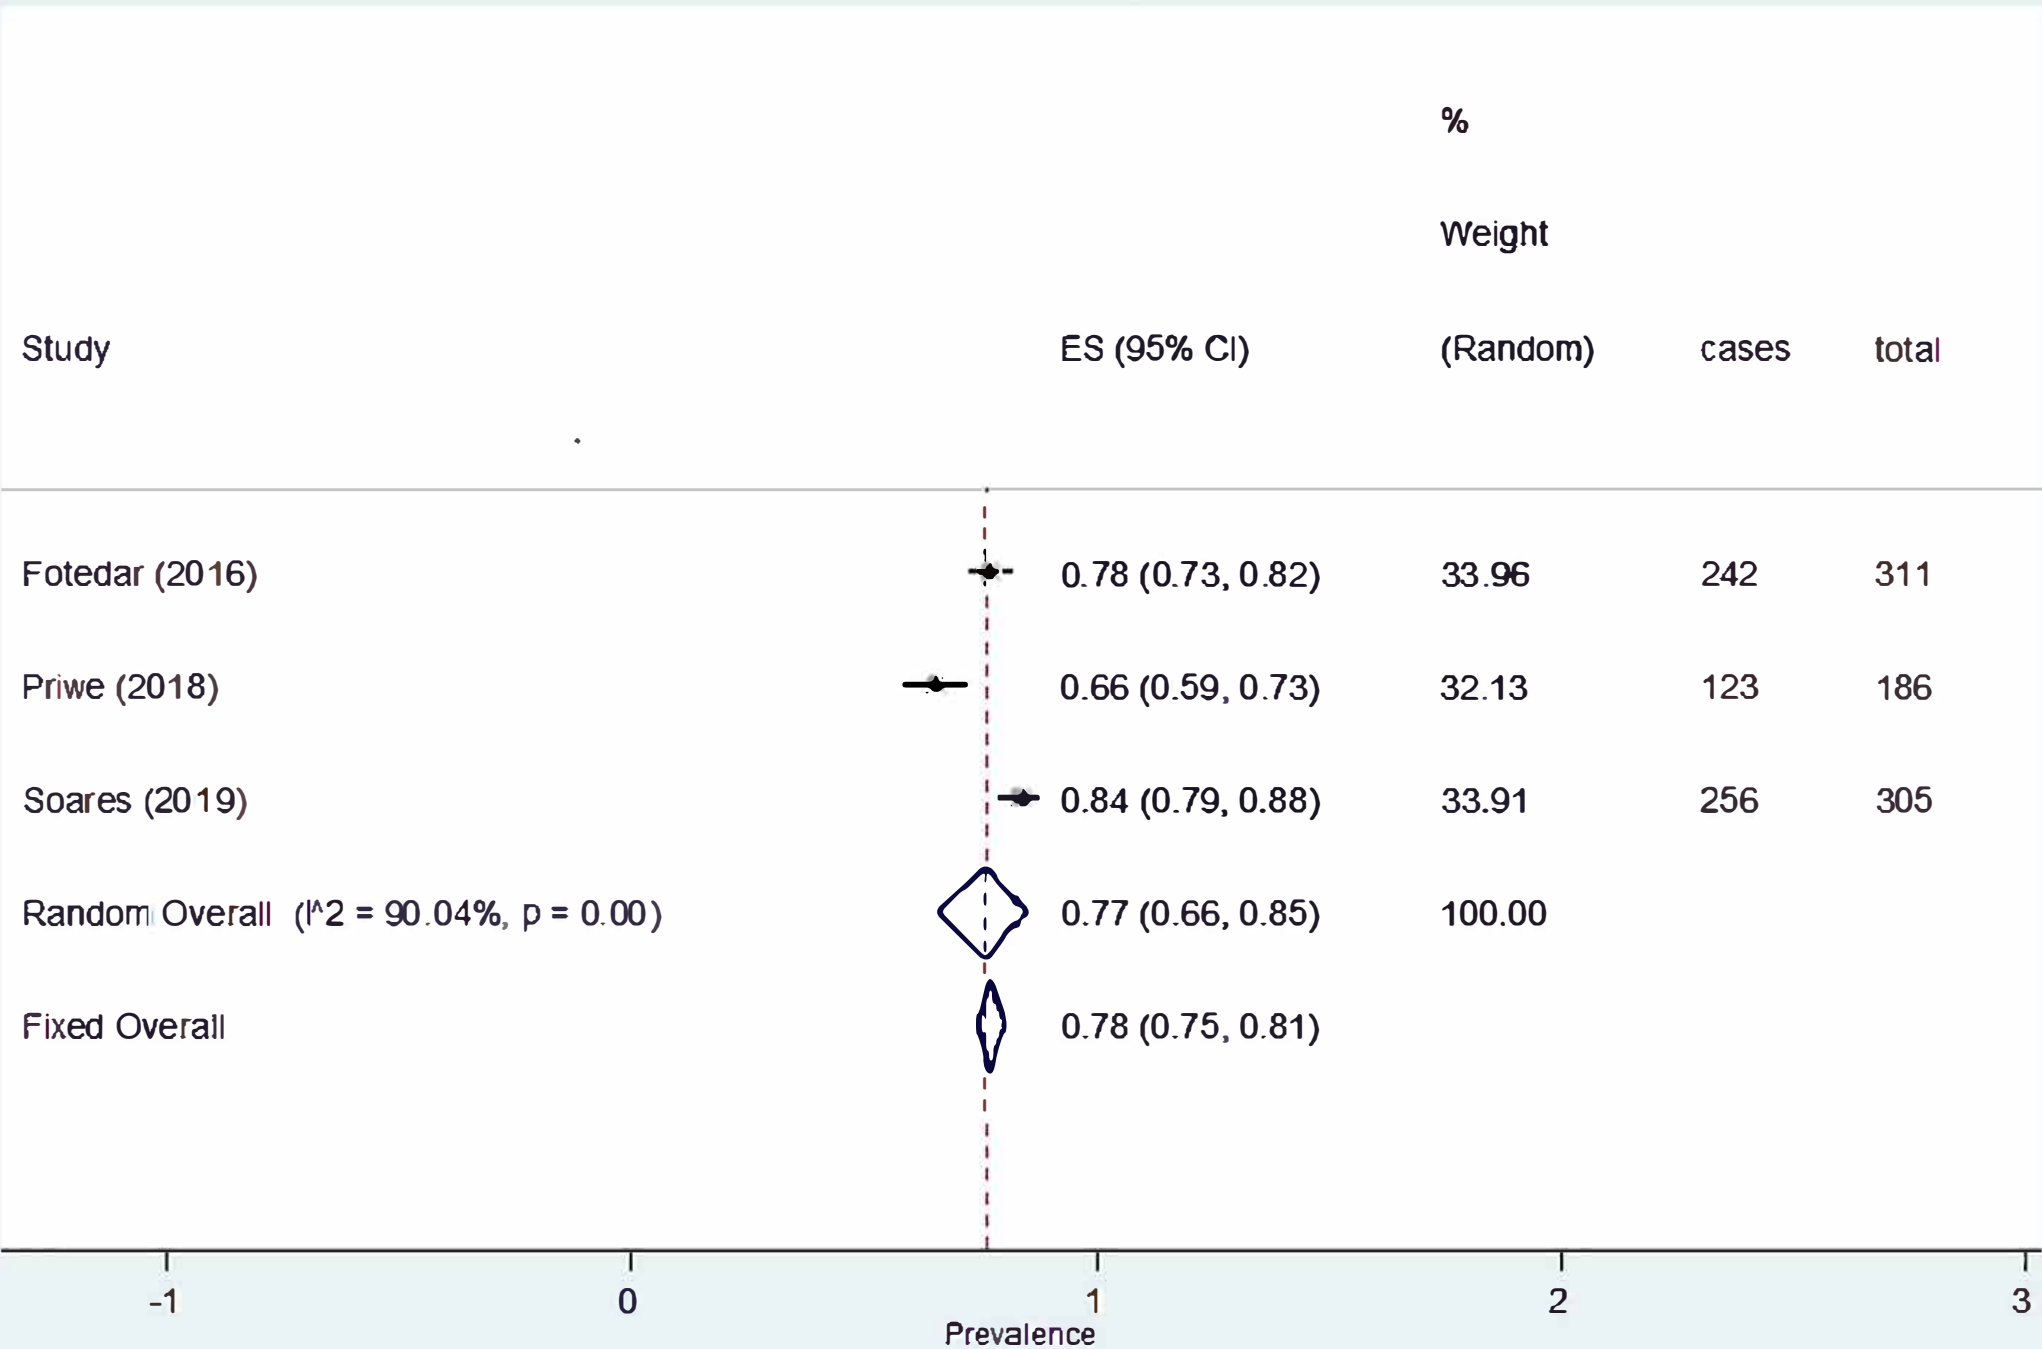

crown caries prevalence AND drug abusers

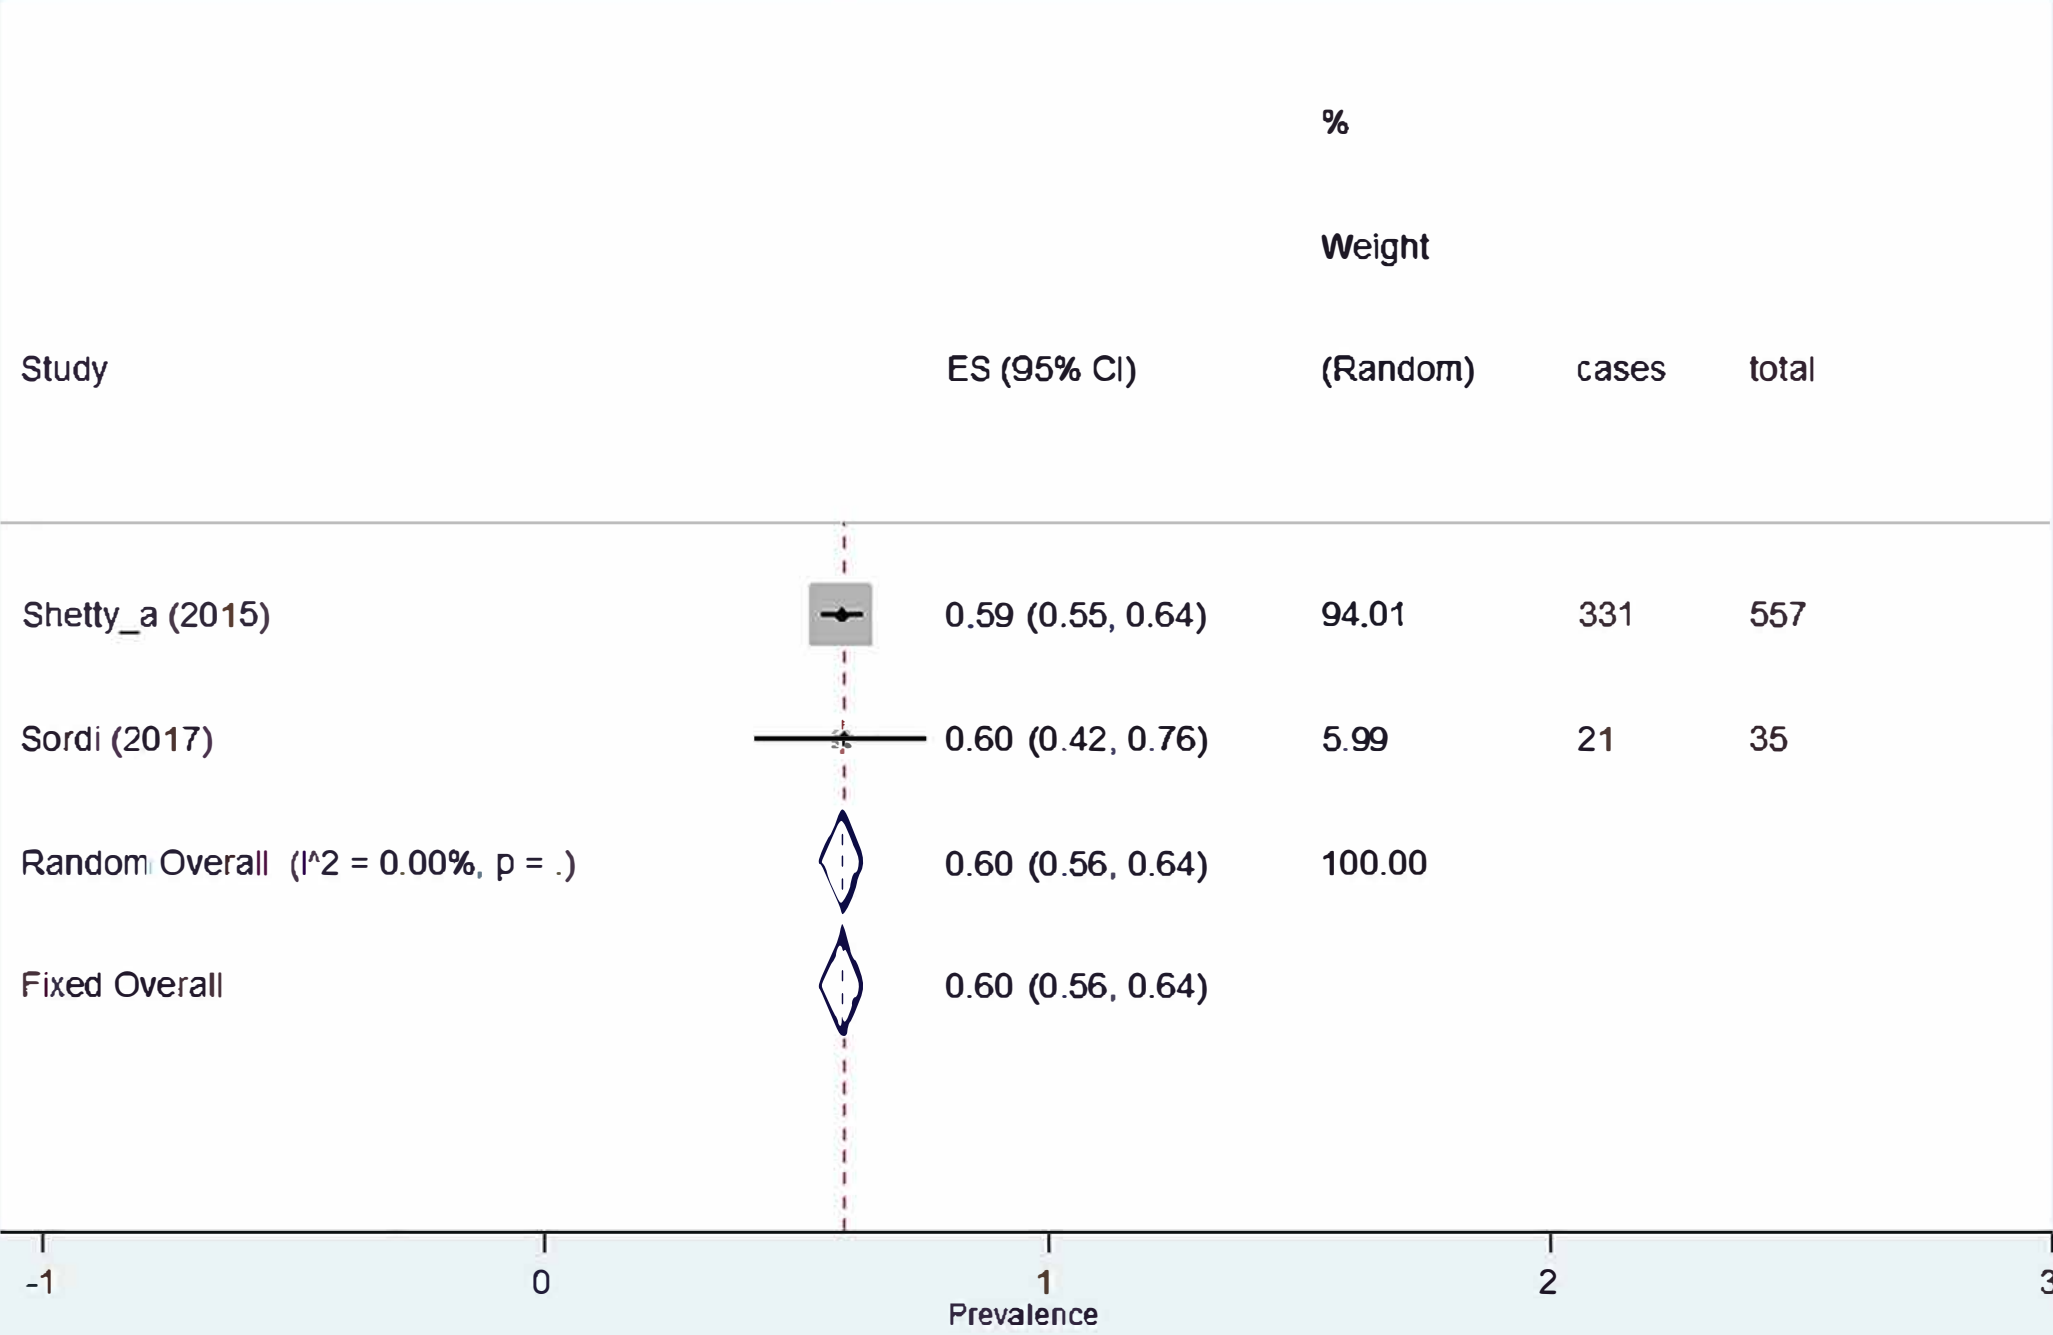

# immigrants and caries prevalence

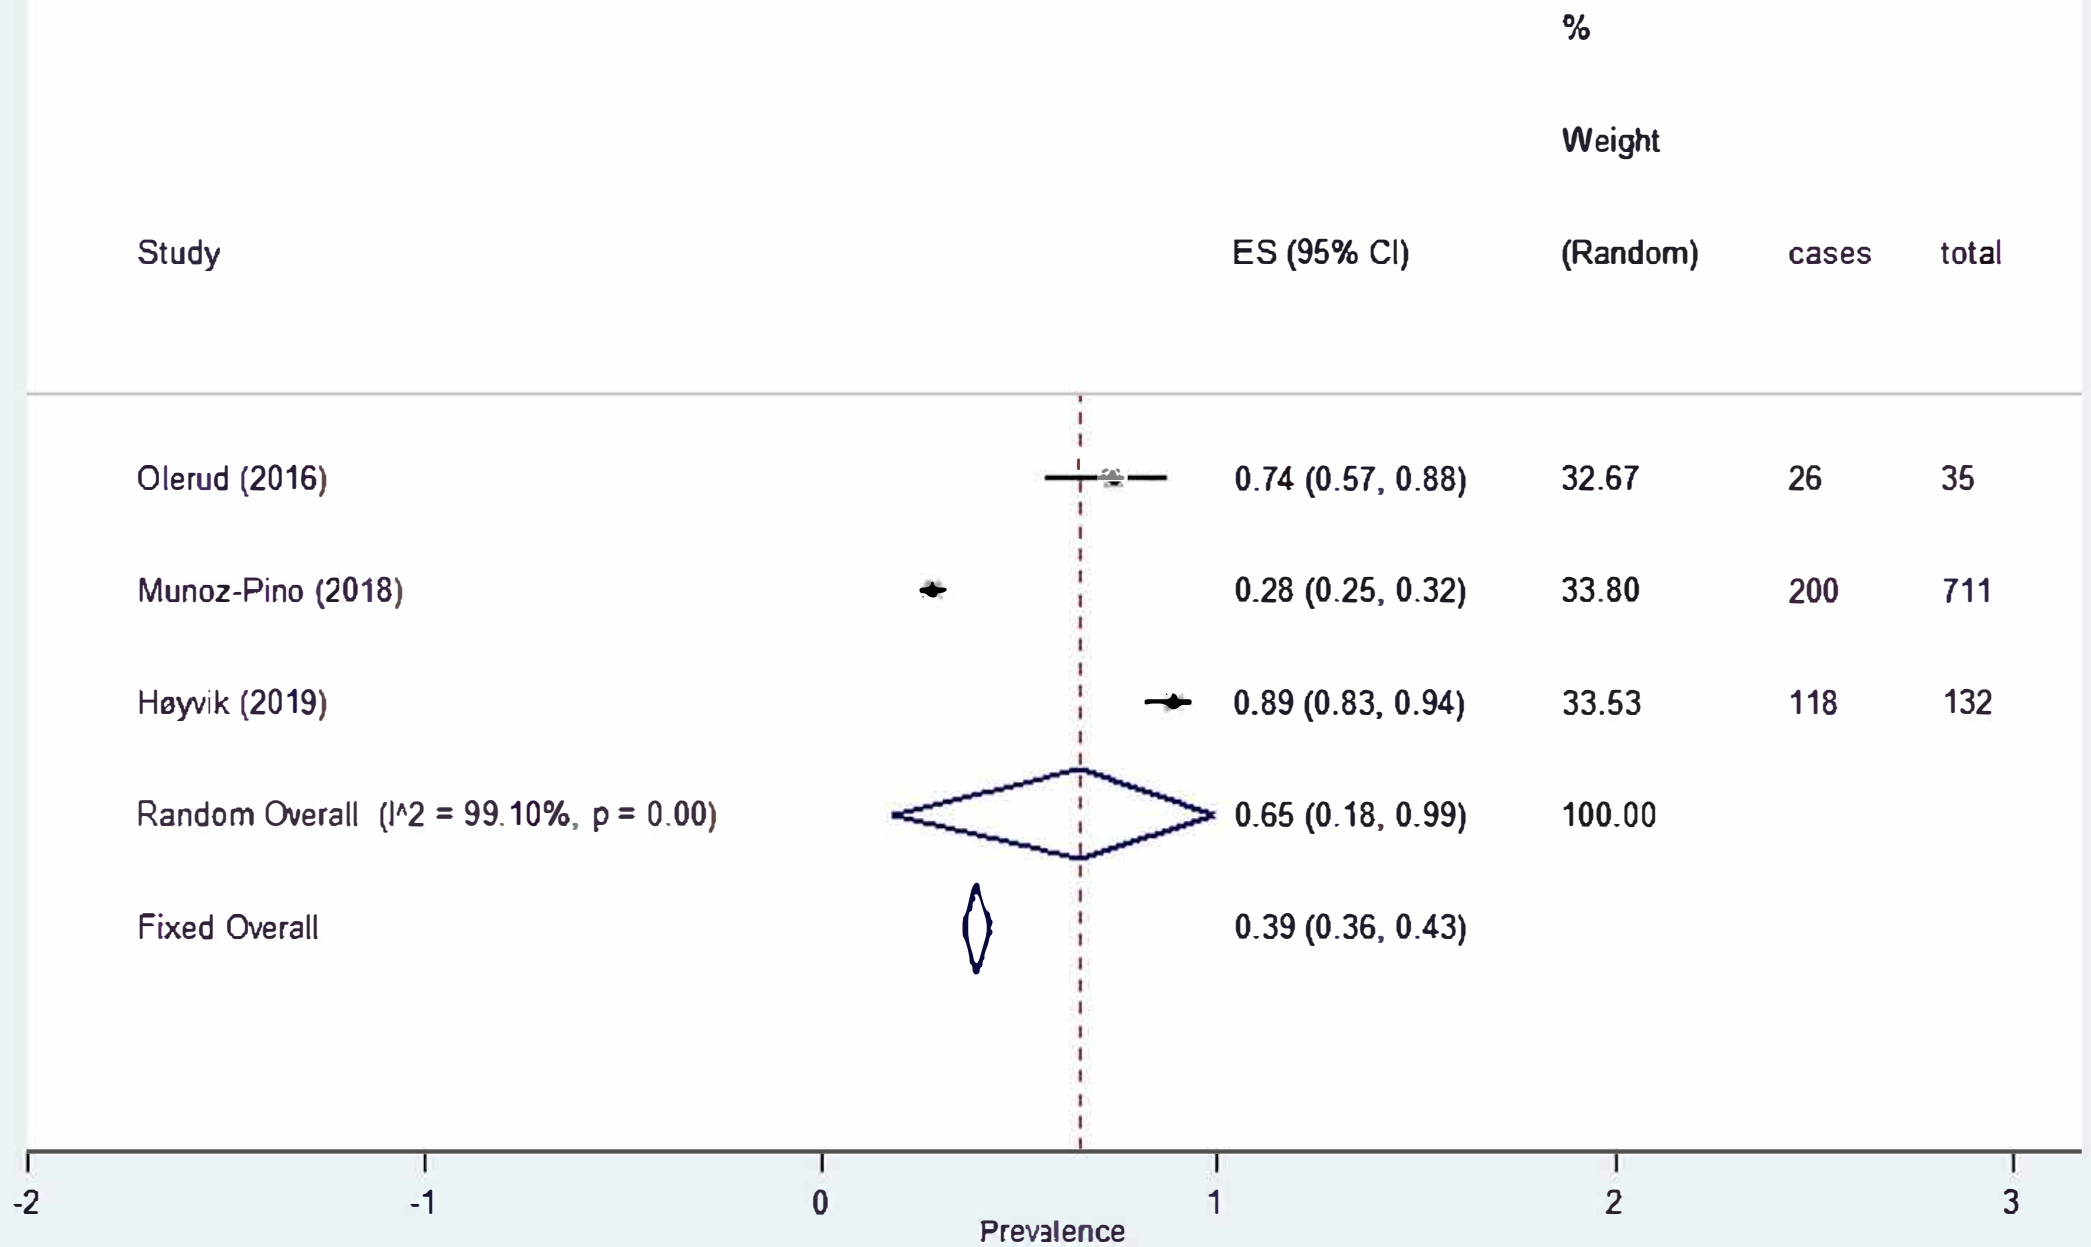

## Caries prevalence in pregnant women

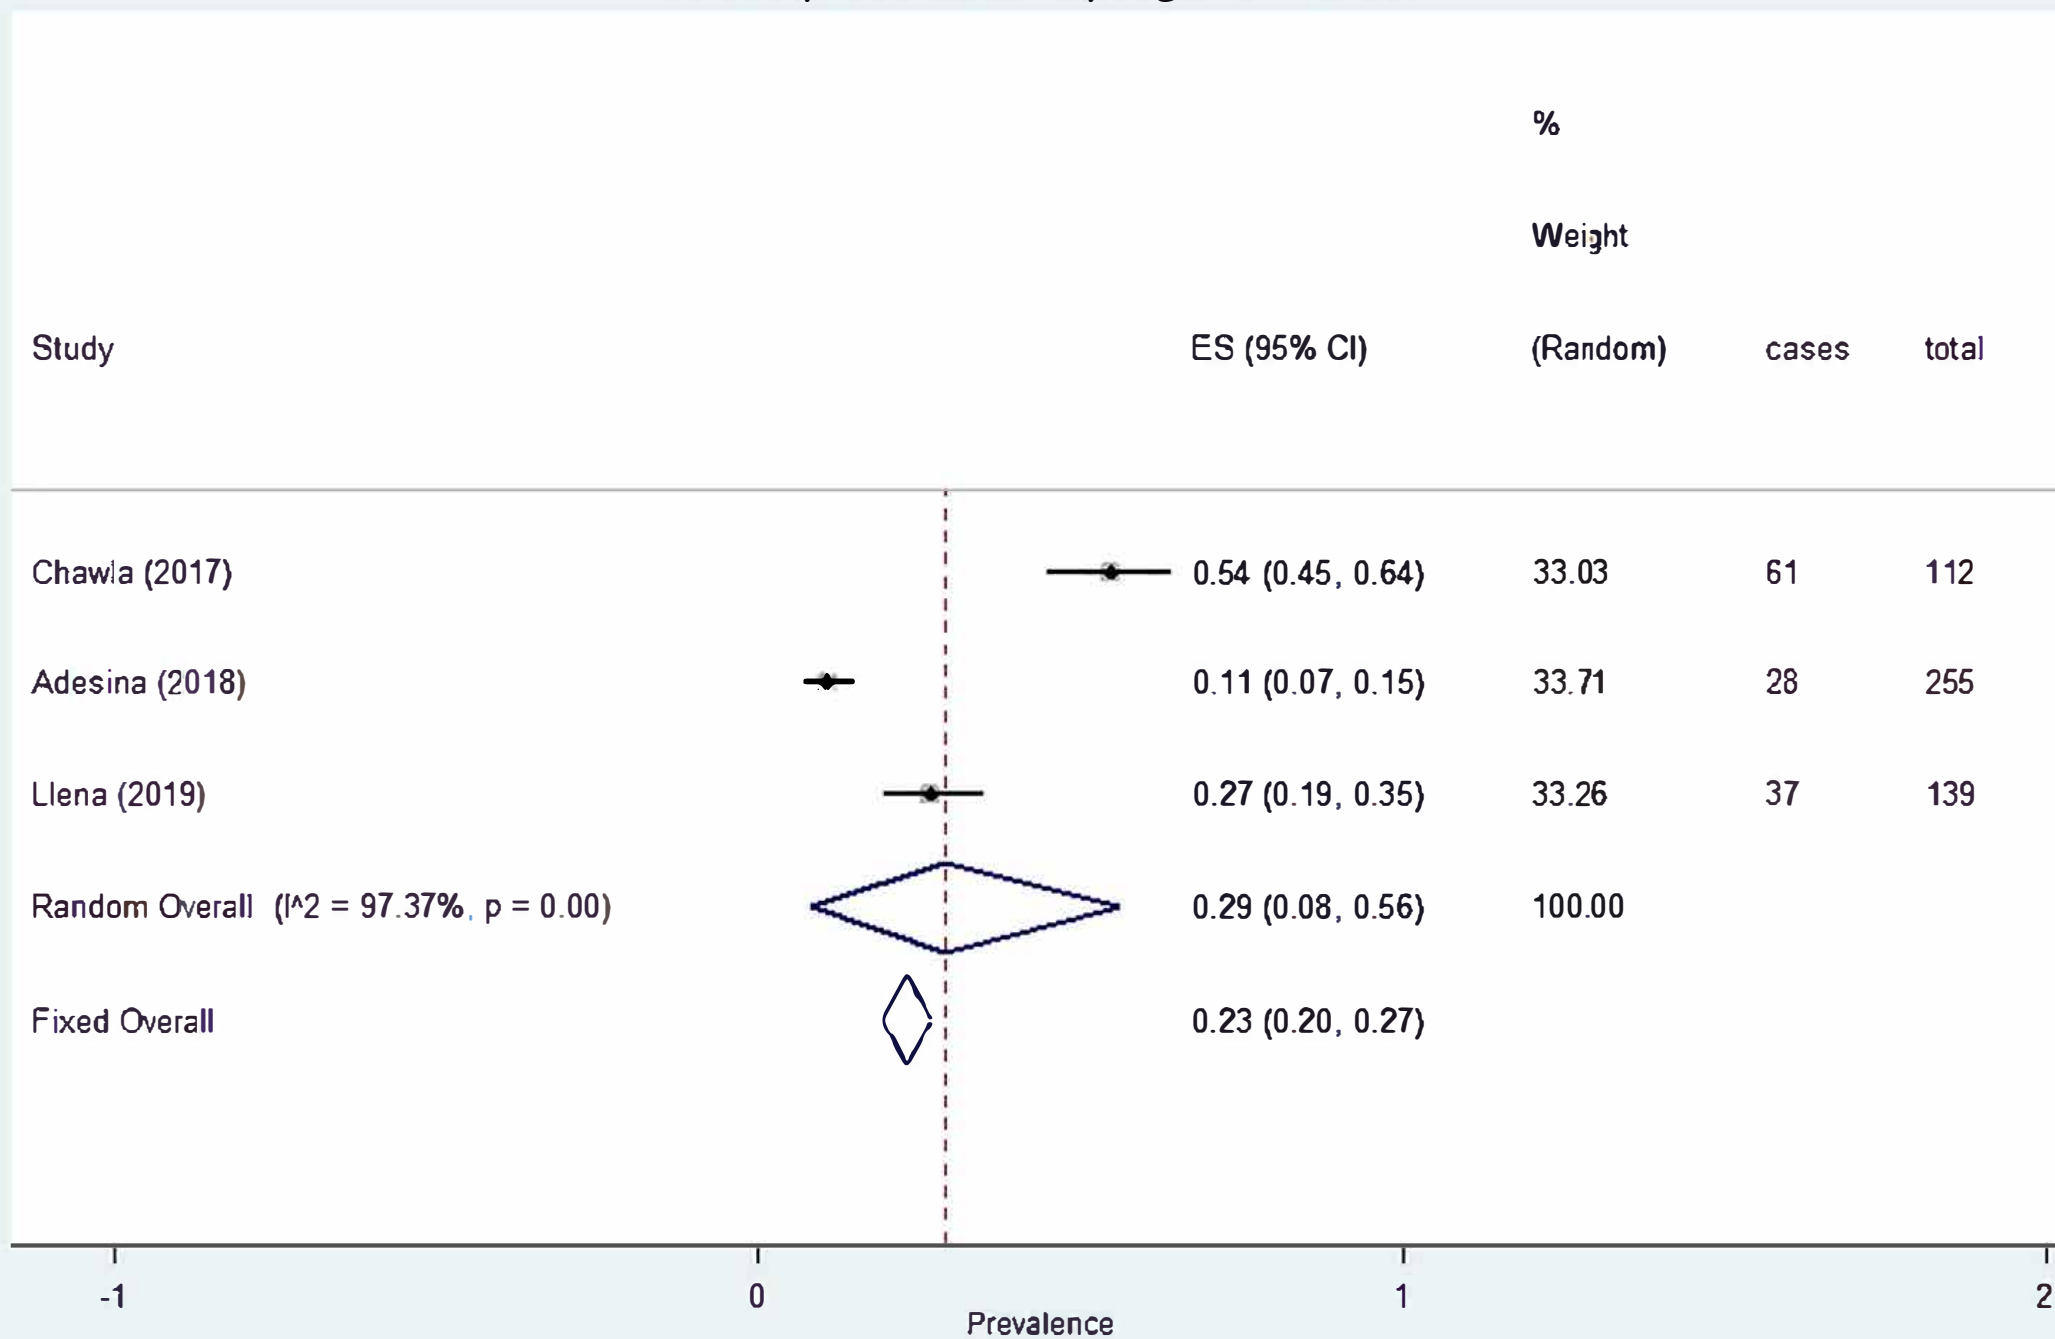

## Low income and caries prevalence

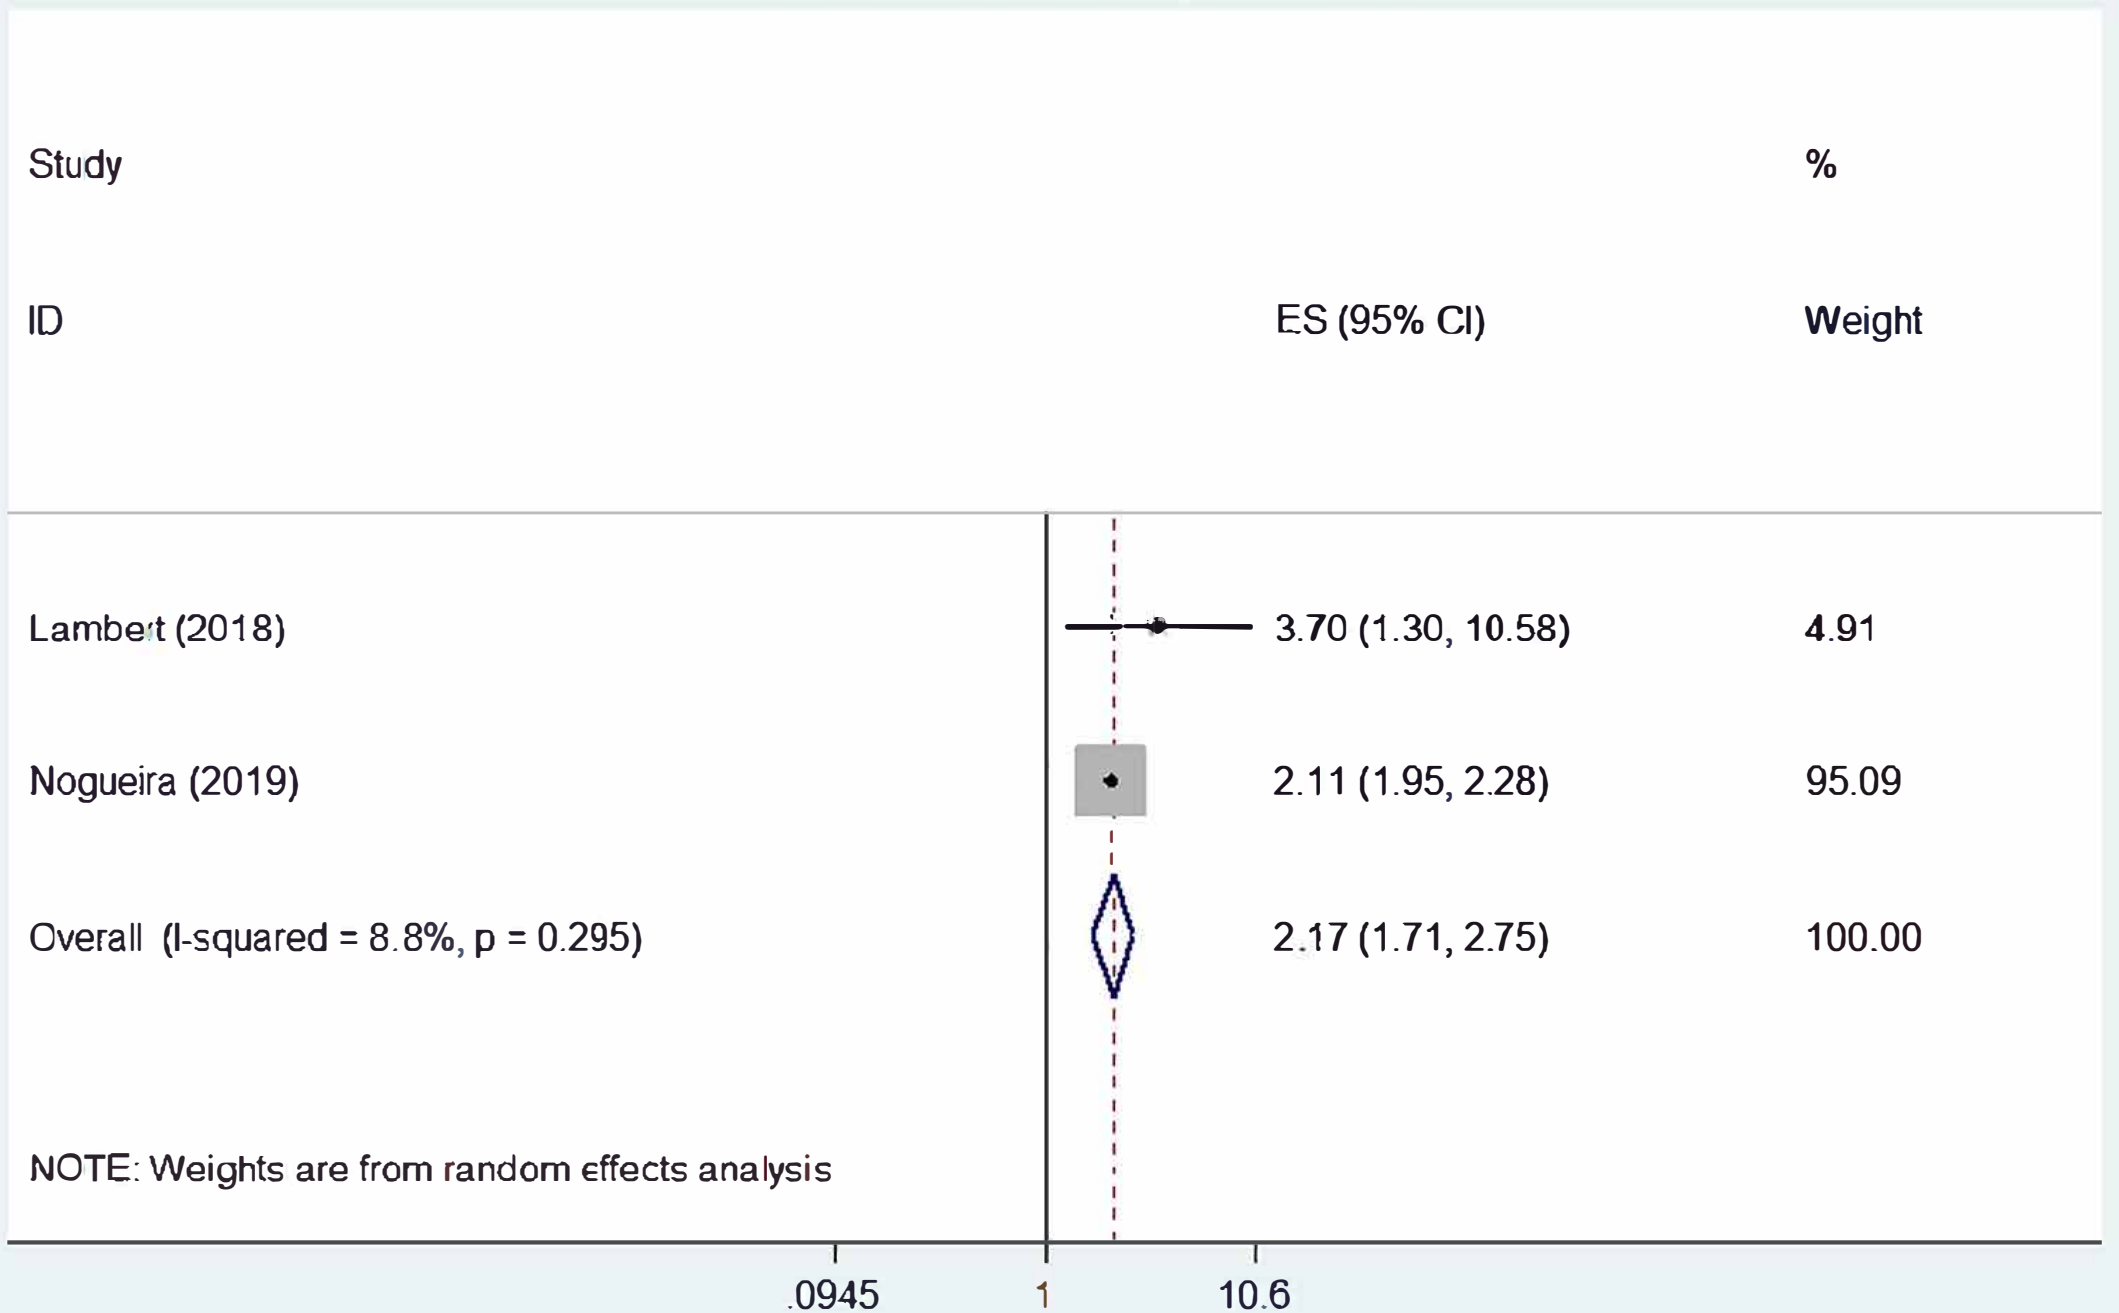

# DMFT and low income

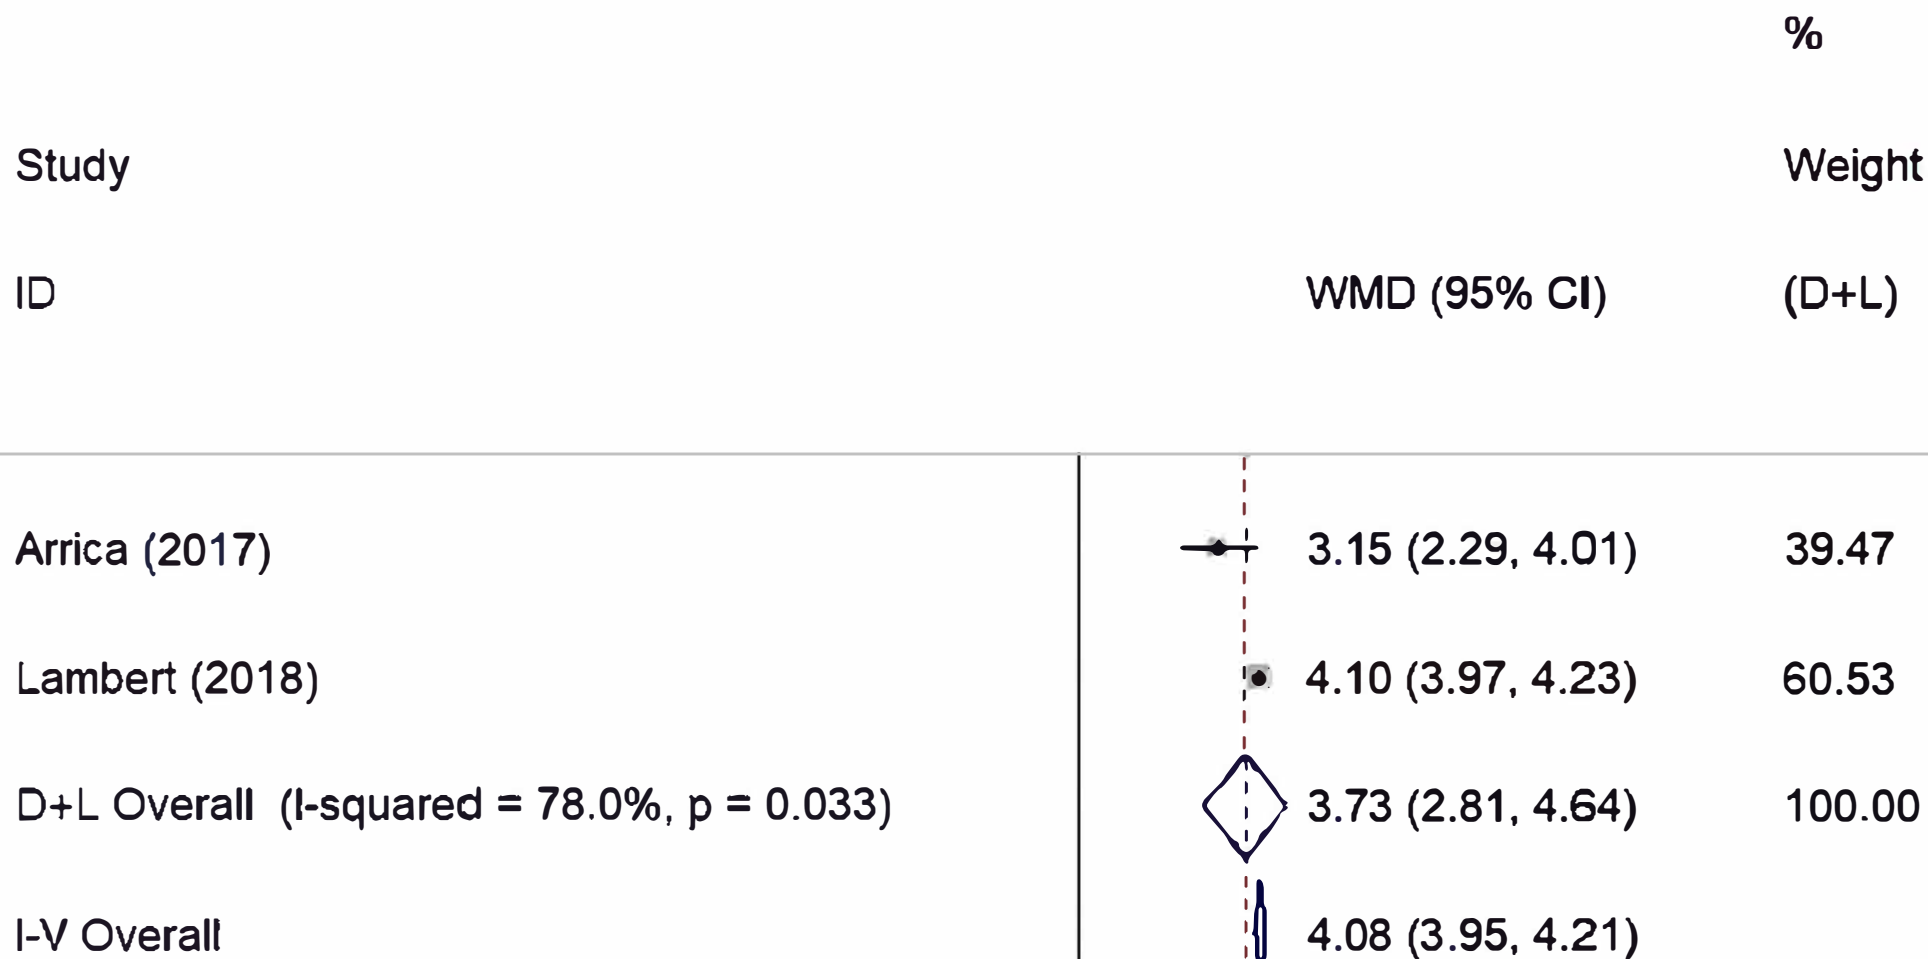

NOTE: Weights are from random effects analysis

# DMFT and low education

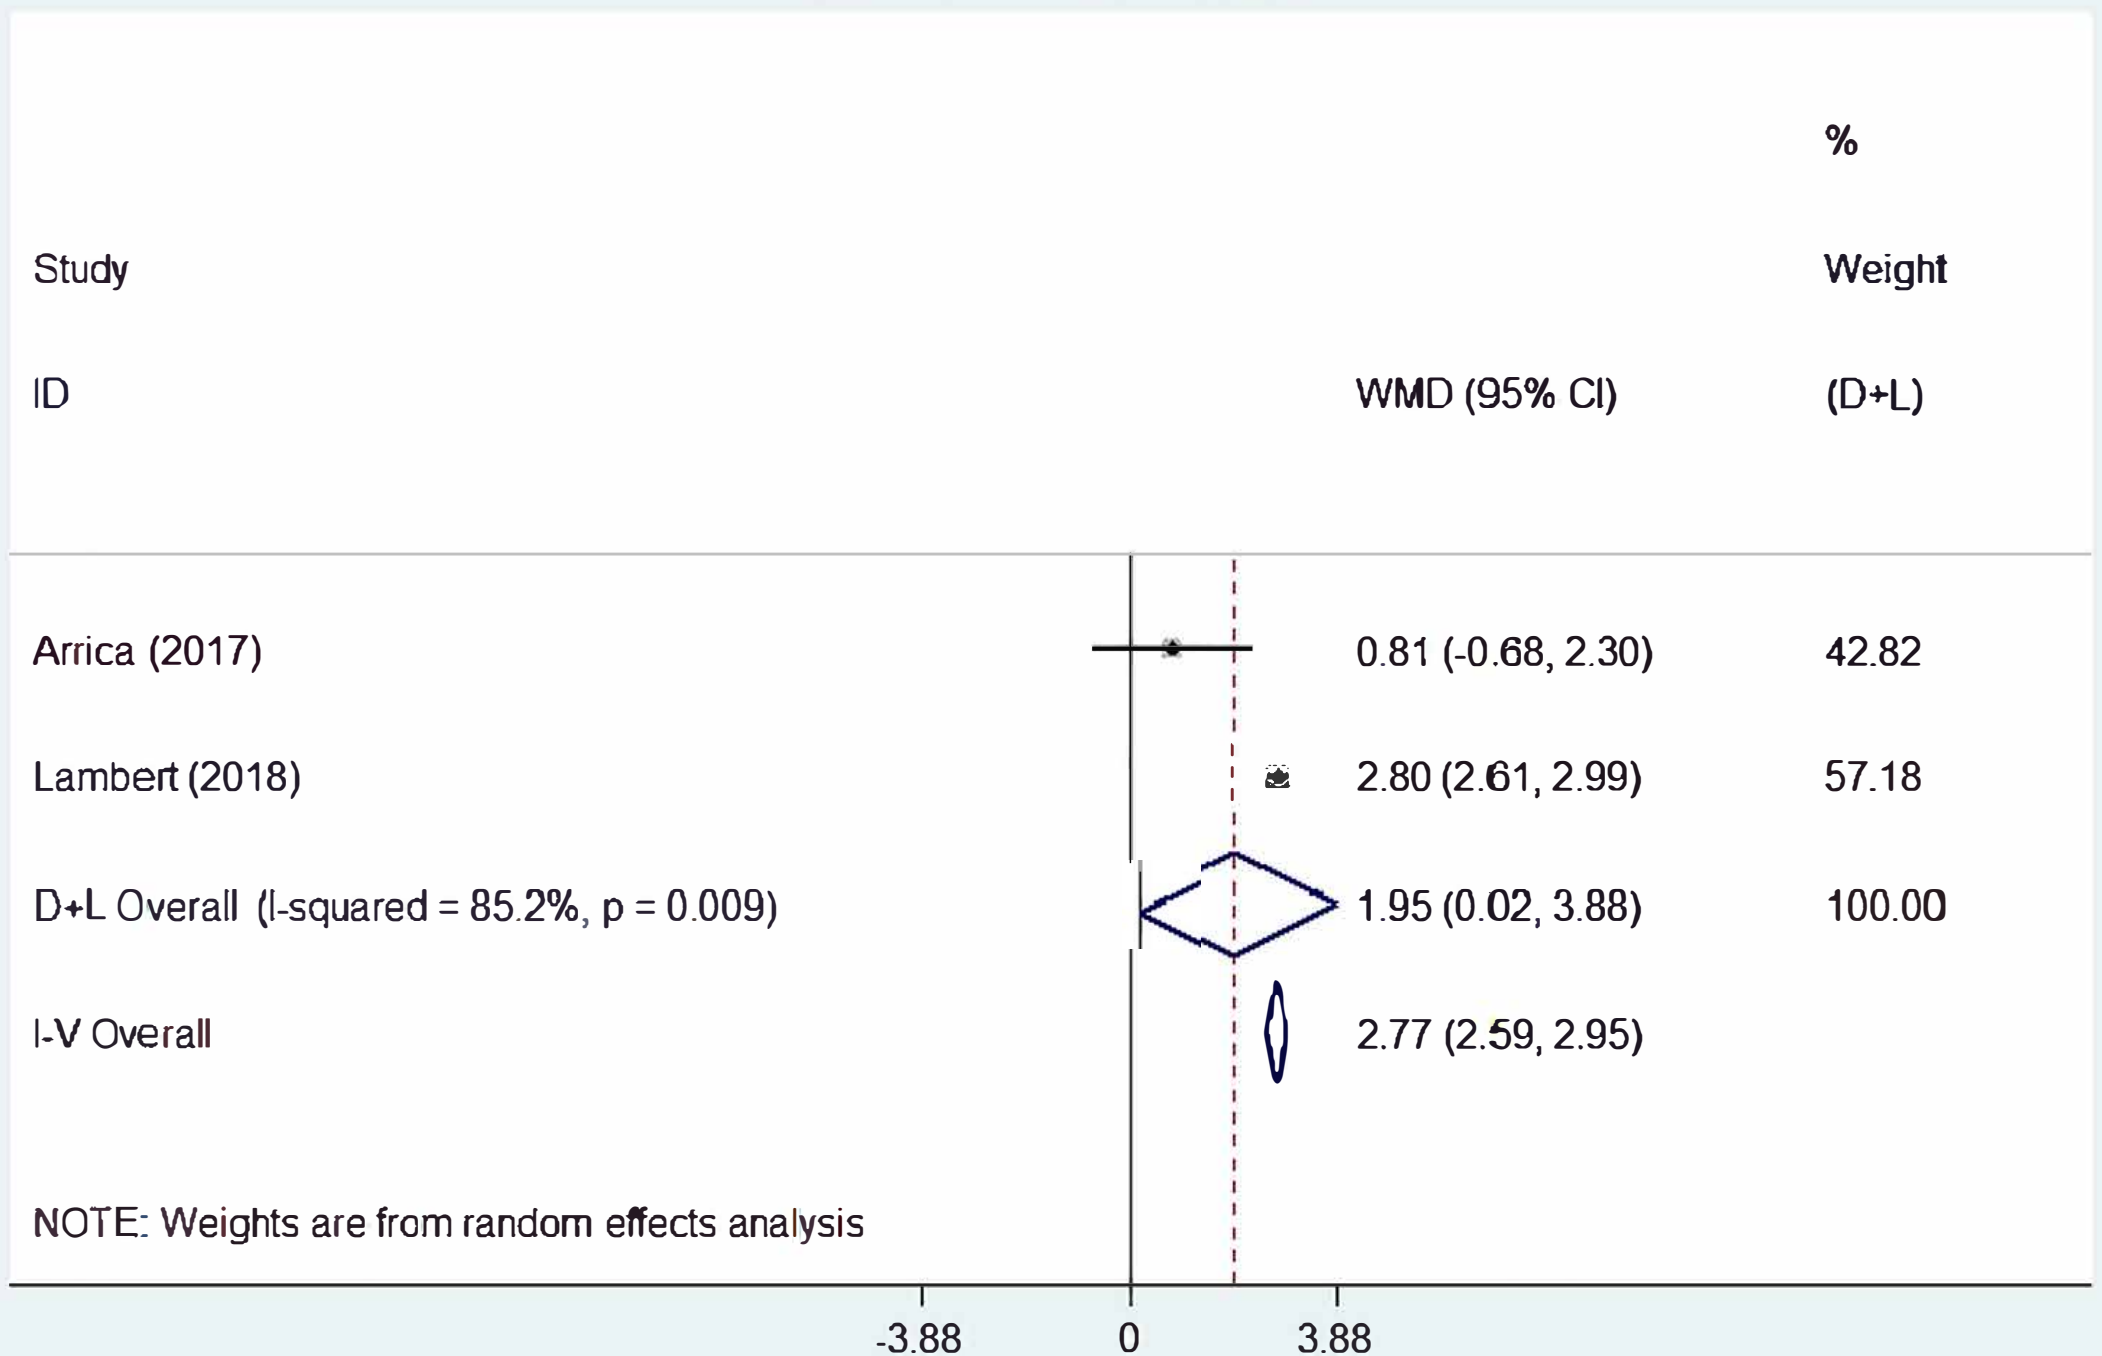

# DMFT and income

|       |              | %      |  |
|-------|--------------|--------|--|
| Study |              | Weight |  |
| ID    | WMD (95% CI) | (D+L)  |  |

|                                           |                   |        |
|-------------------------------------------|-------------------|--------|
| Arrica (2017)                             | 3.15 (2.30, 4.00) | 2.34   |
| Lambert (2018)                            | 2.80 (2.67, 2.93) | 97.66  |
| D+L Overall (I-squared = 0.0%, p = 0.425) | 2.81 (2.68, 2.94) | 100.00 |
| I-V Overall                               | 2.81 (2.68, 2.94) |        |

NOTE: Weights are from random effects analysis

-4 0 4



Gingivitis in drug abusers

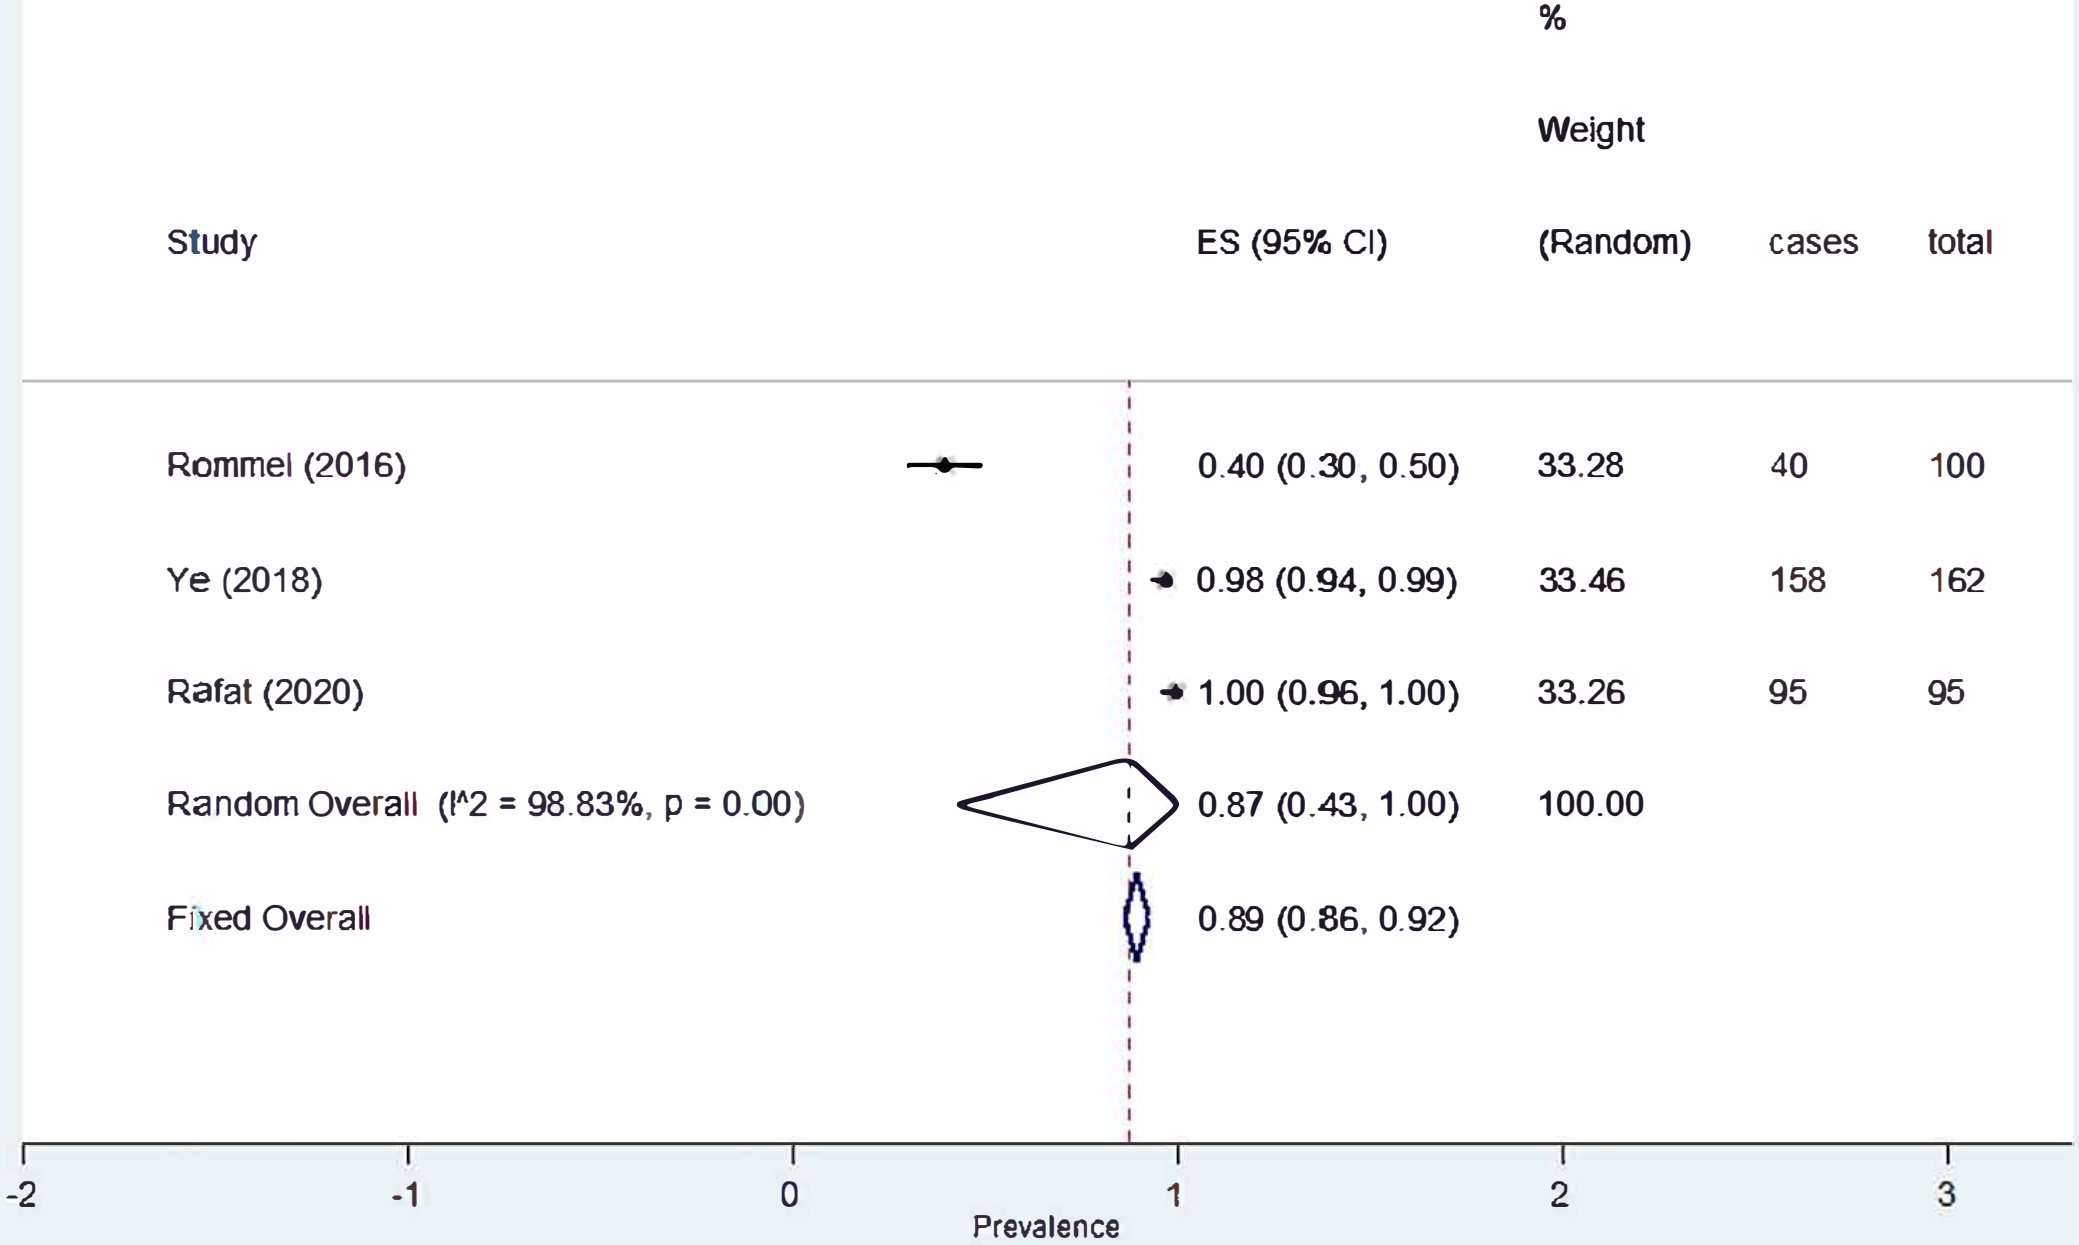

## Gingivitis in elderly

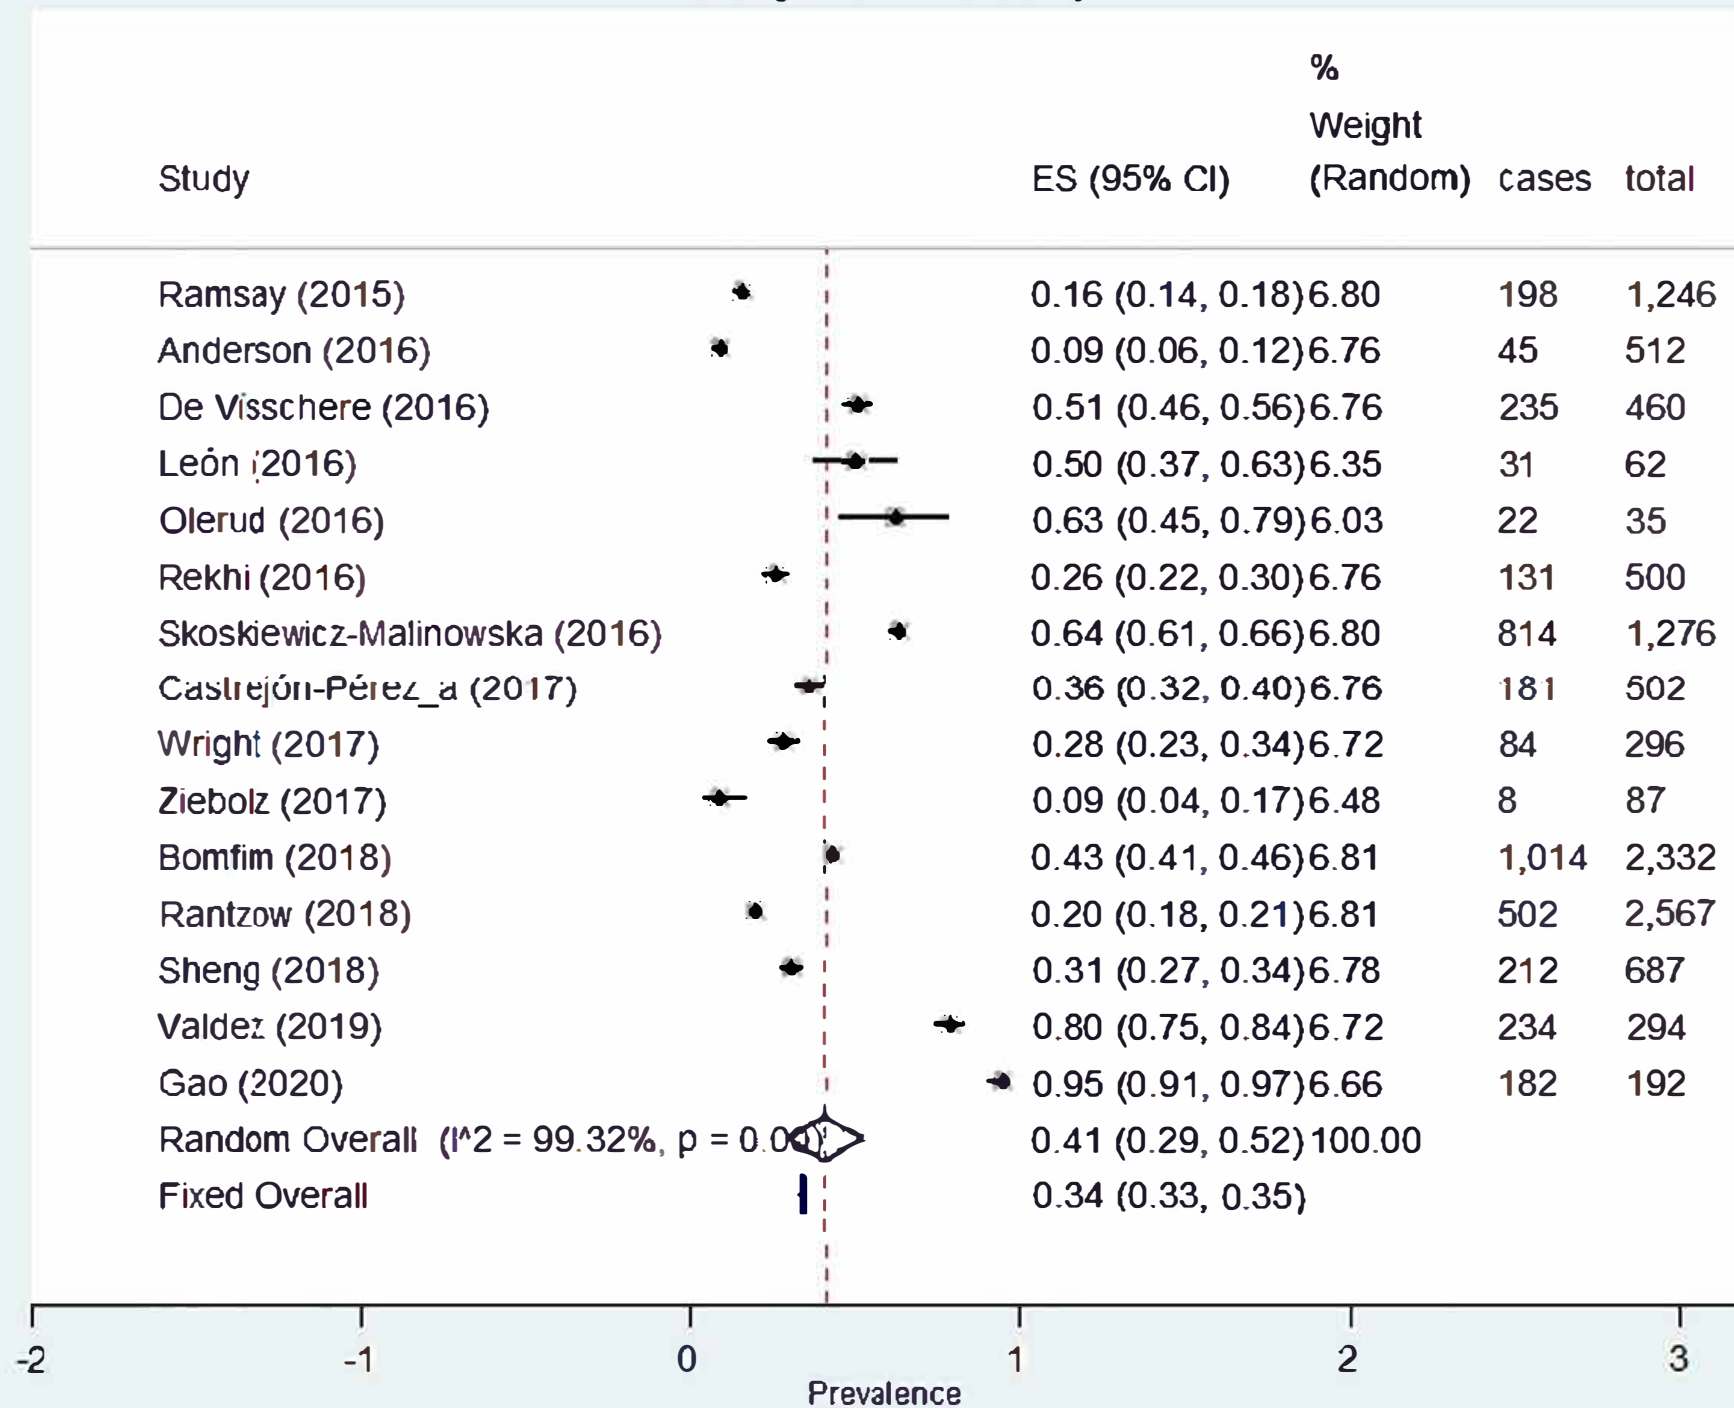

Gingivitis in low-educated people

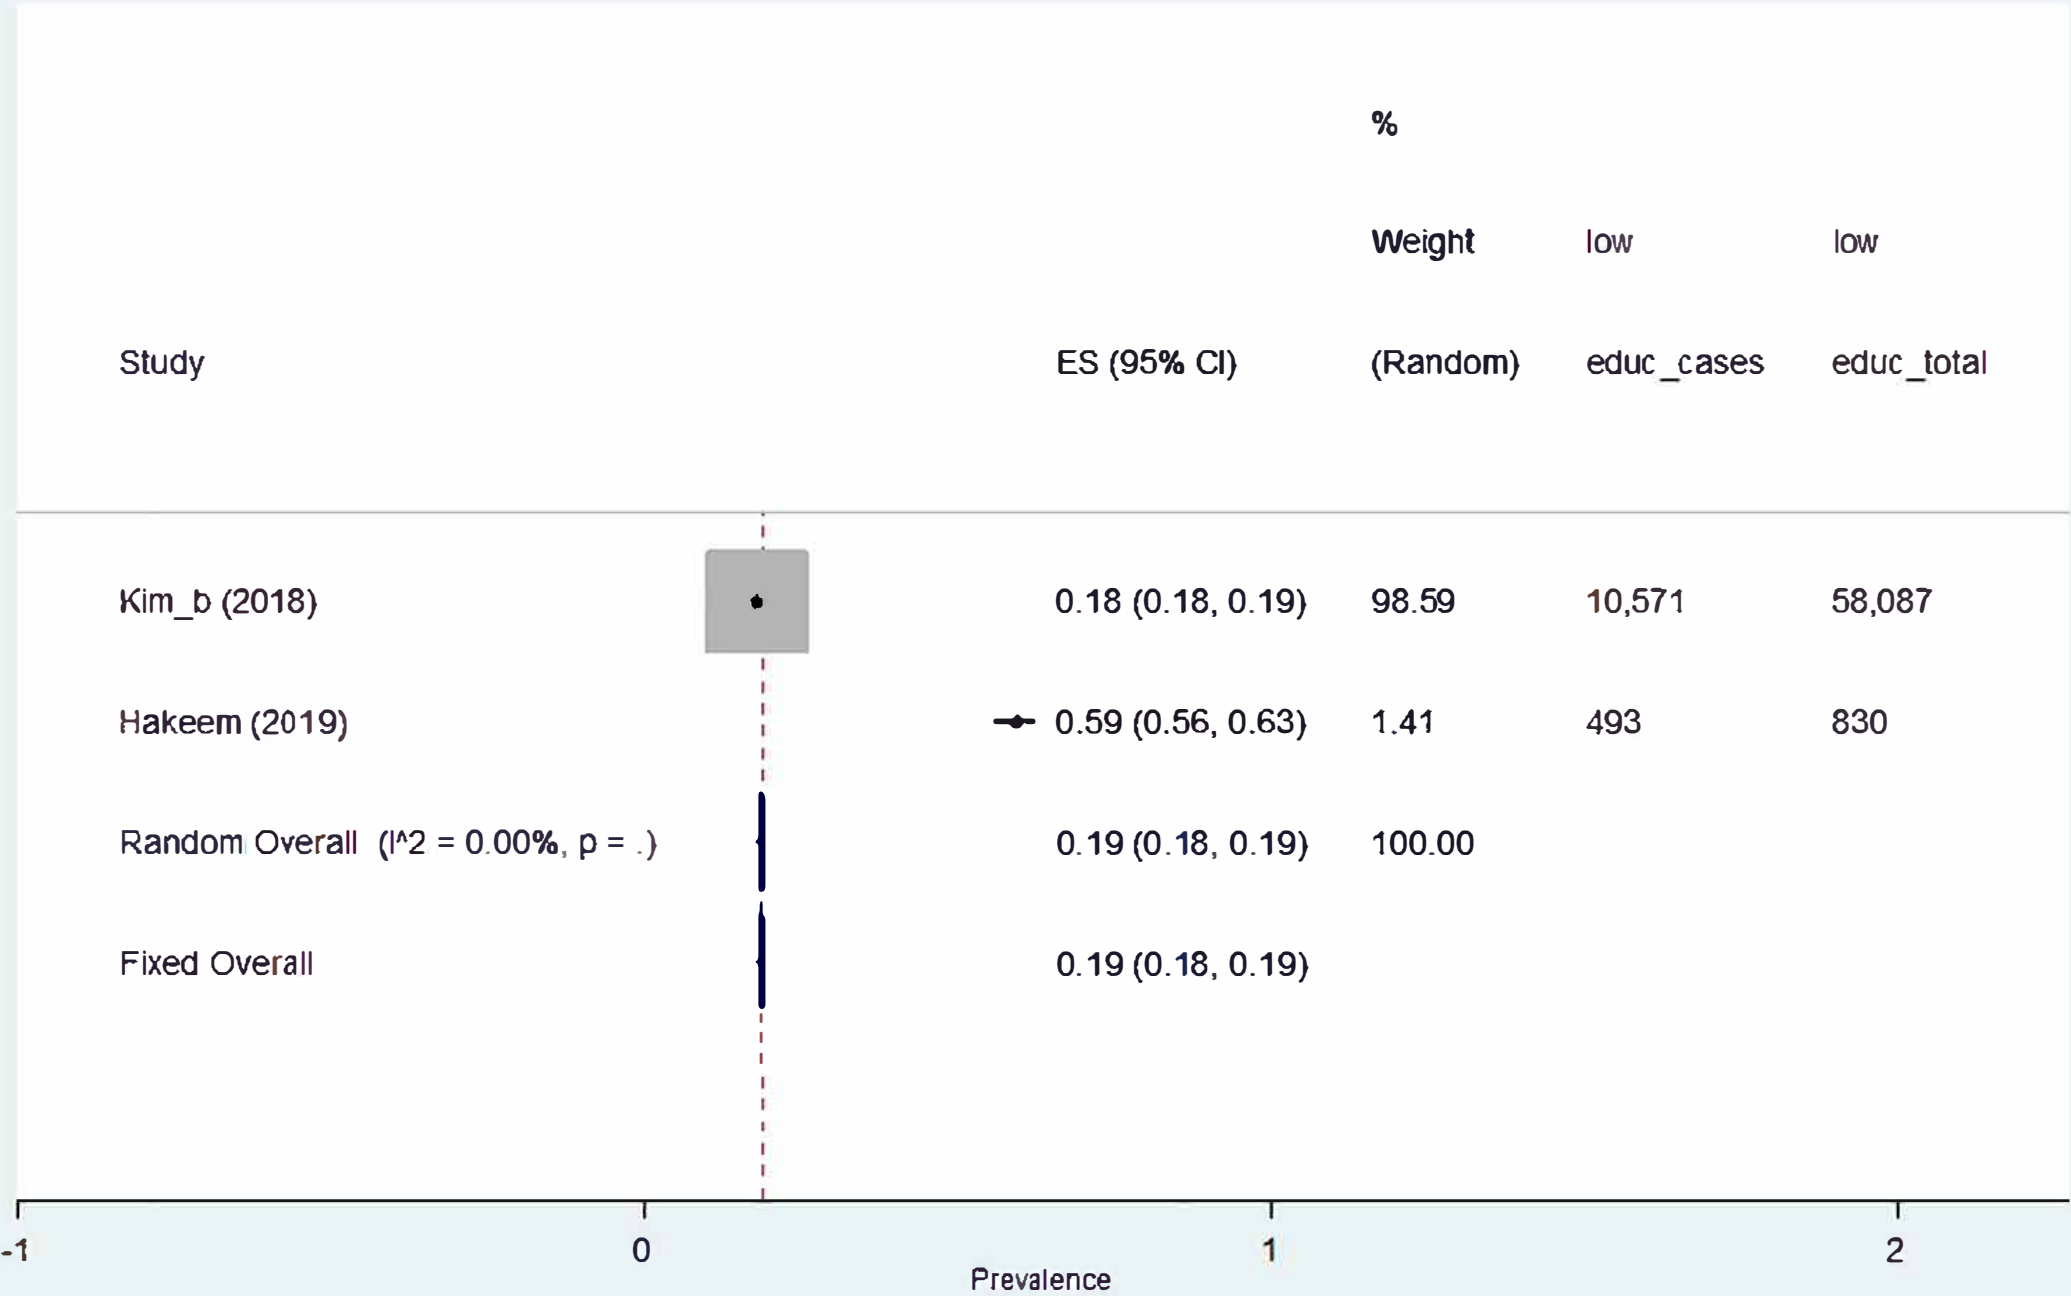

Gingivitis in low-educated vs high-educated people

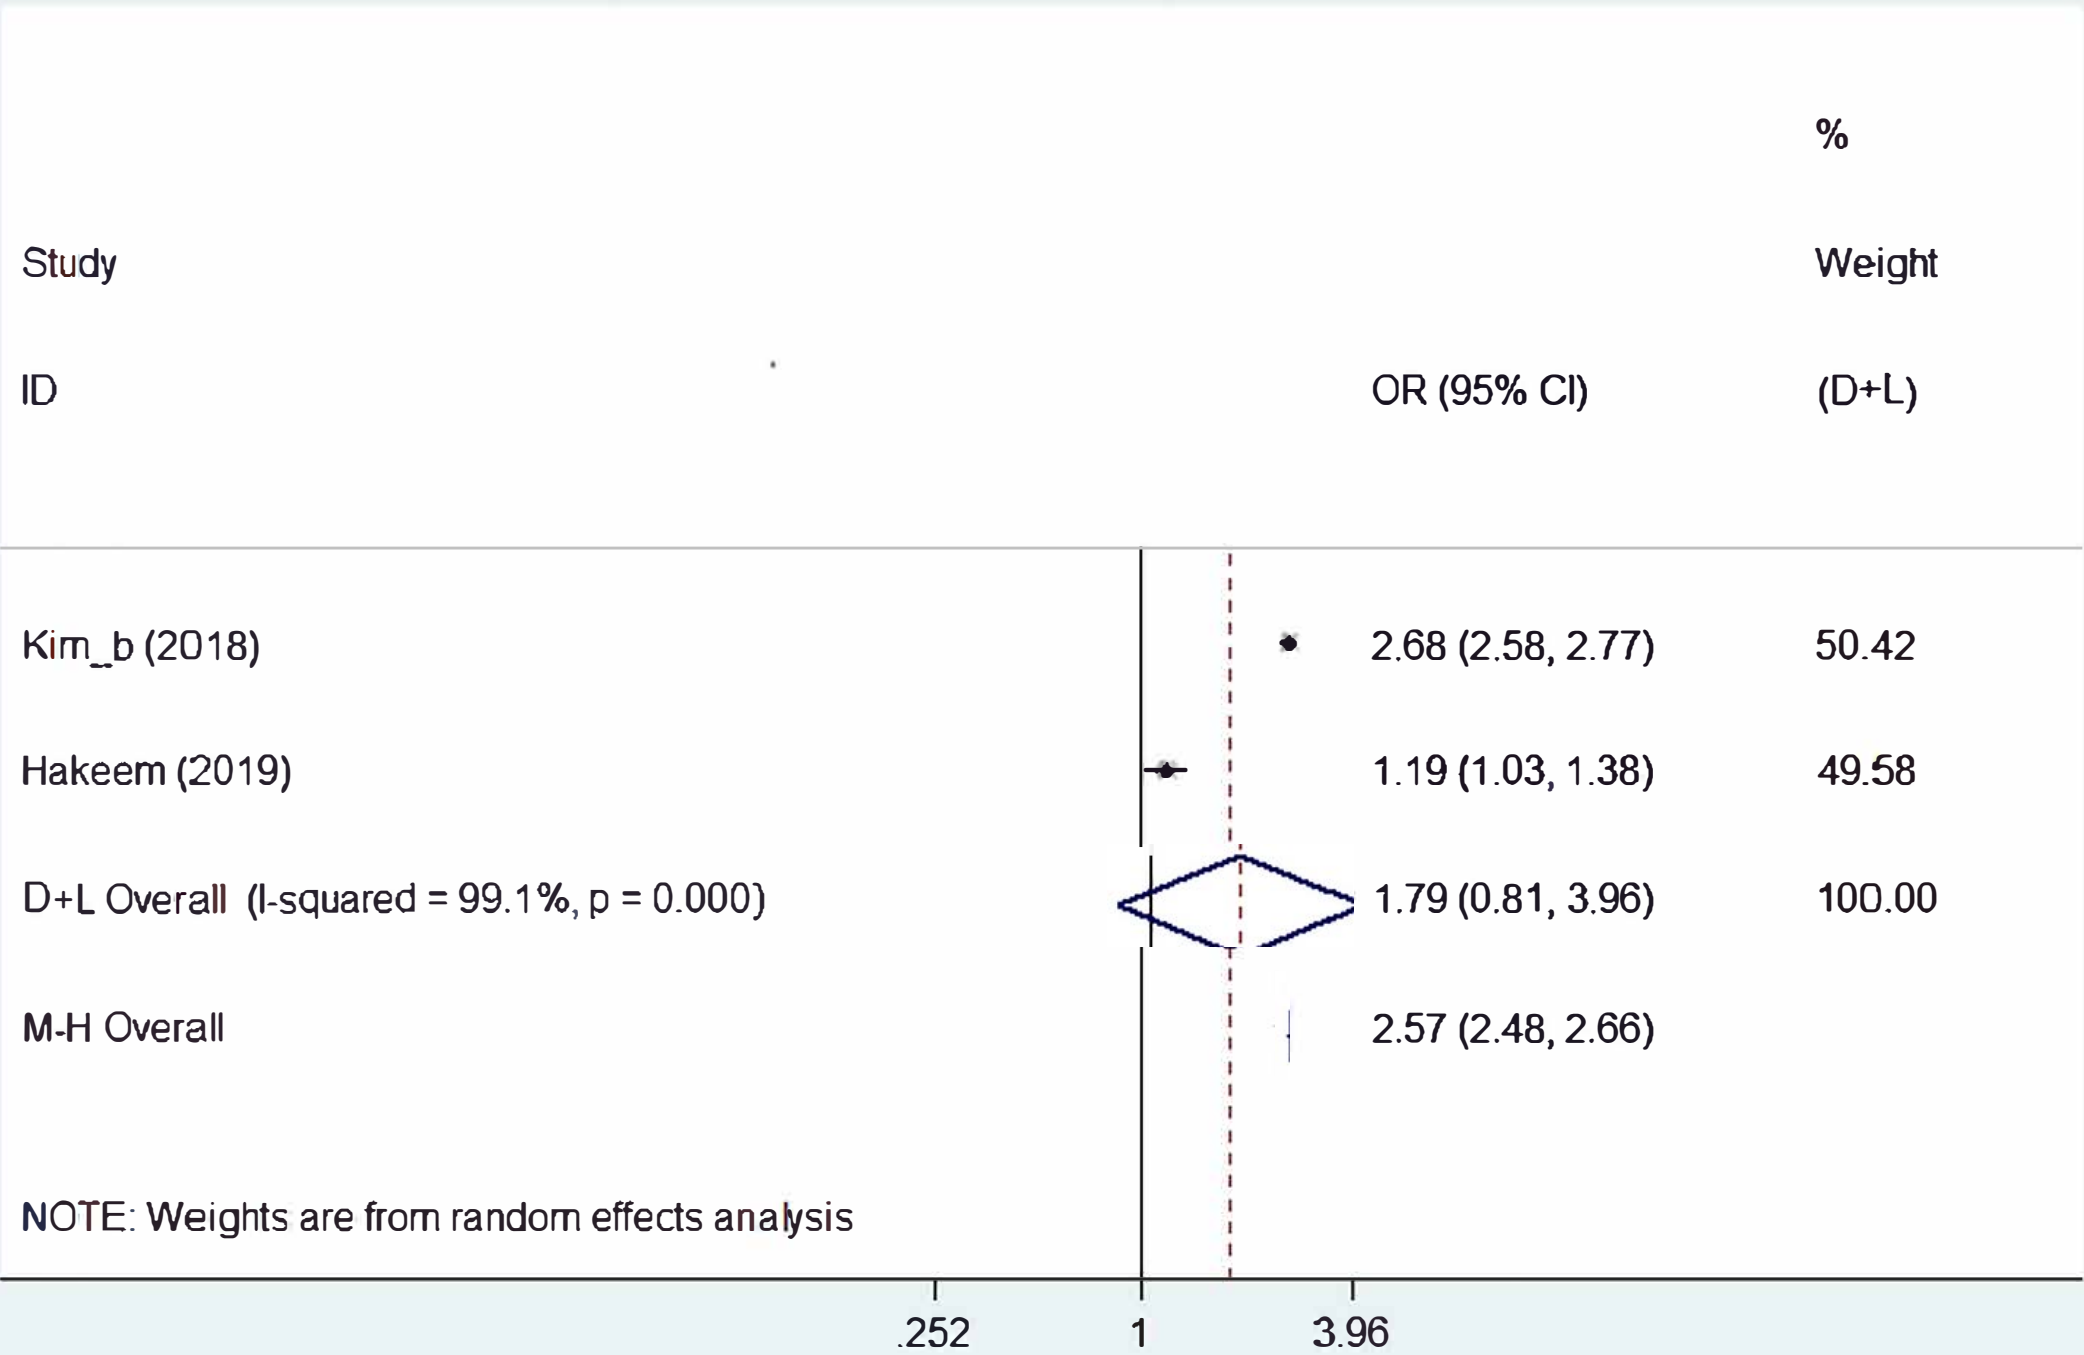

# Gingivitis in prisoners

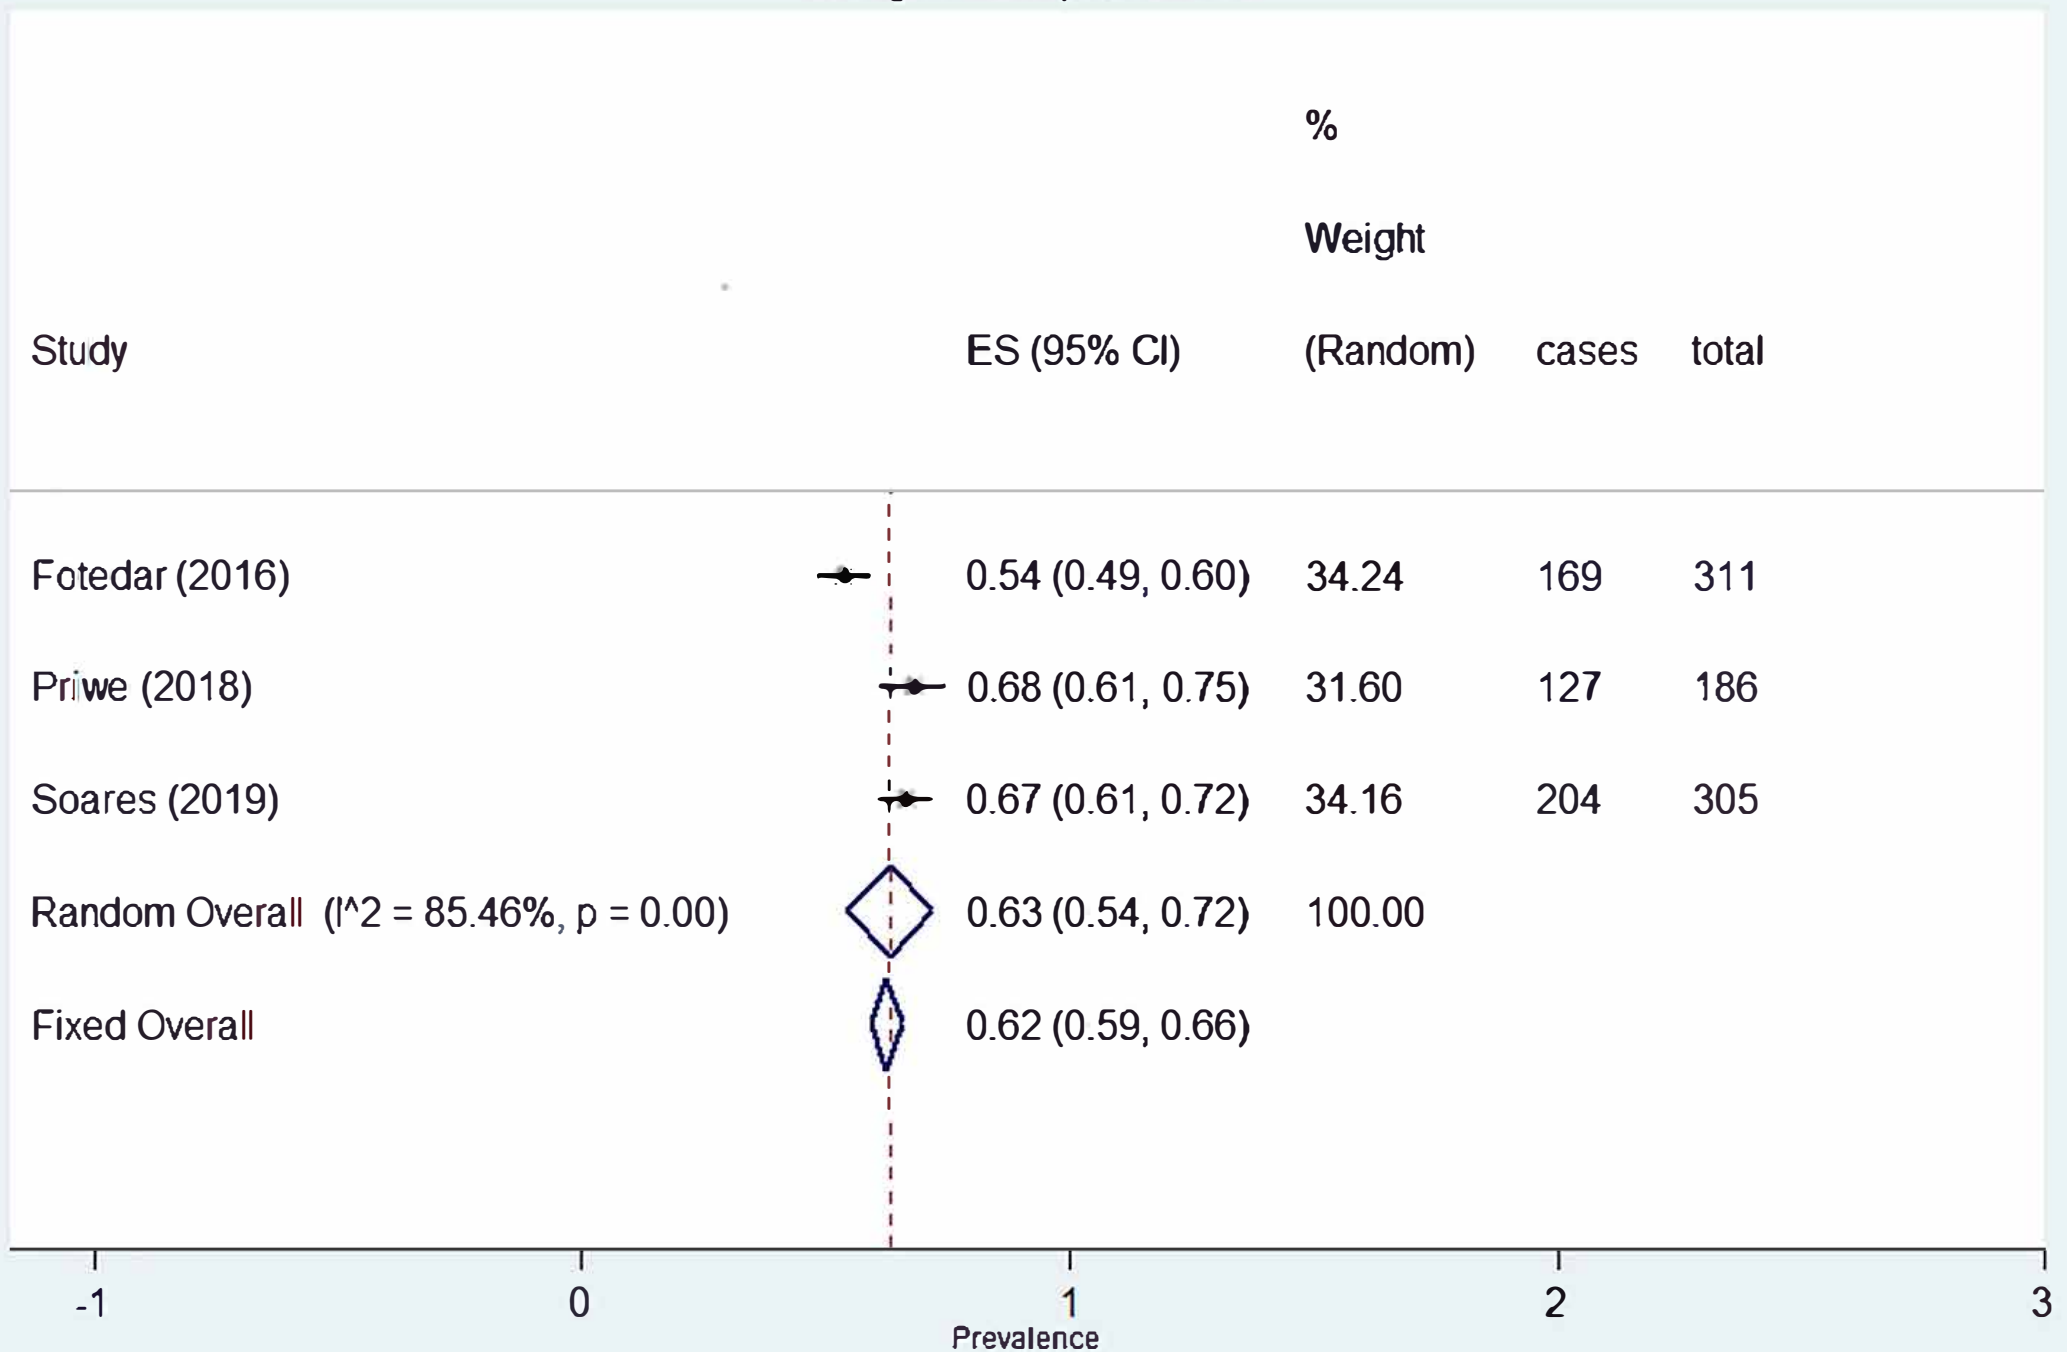

# Periodontitis in low-educated people

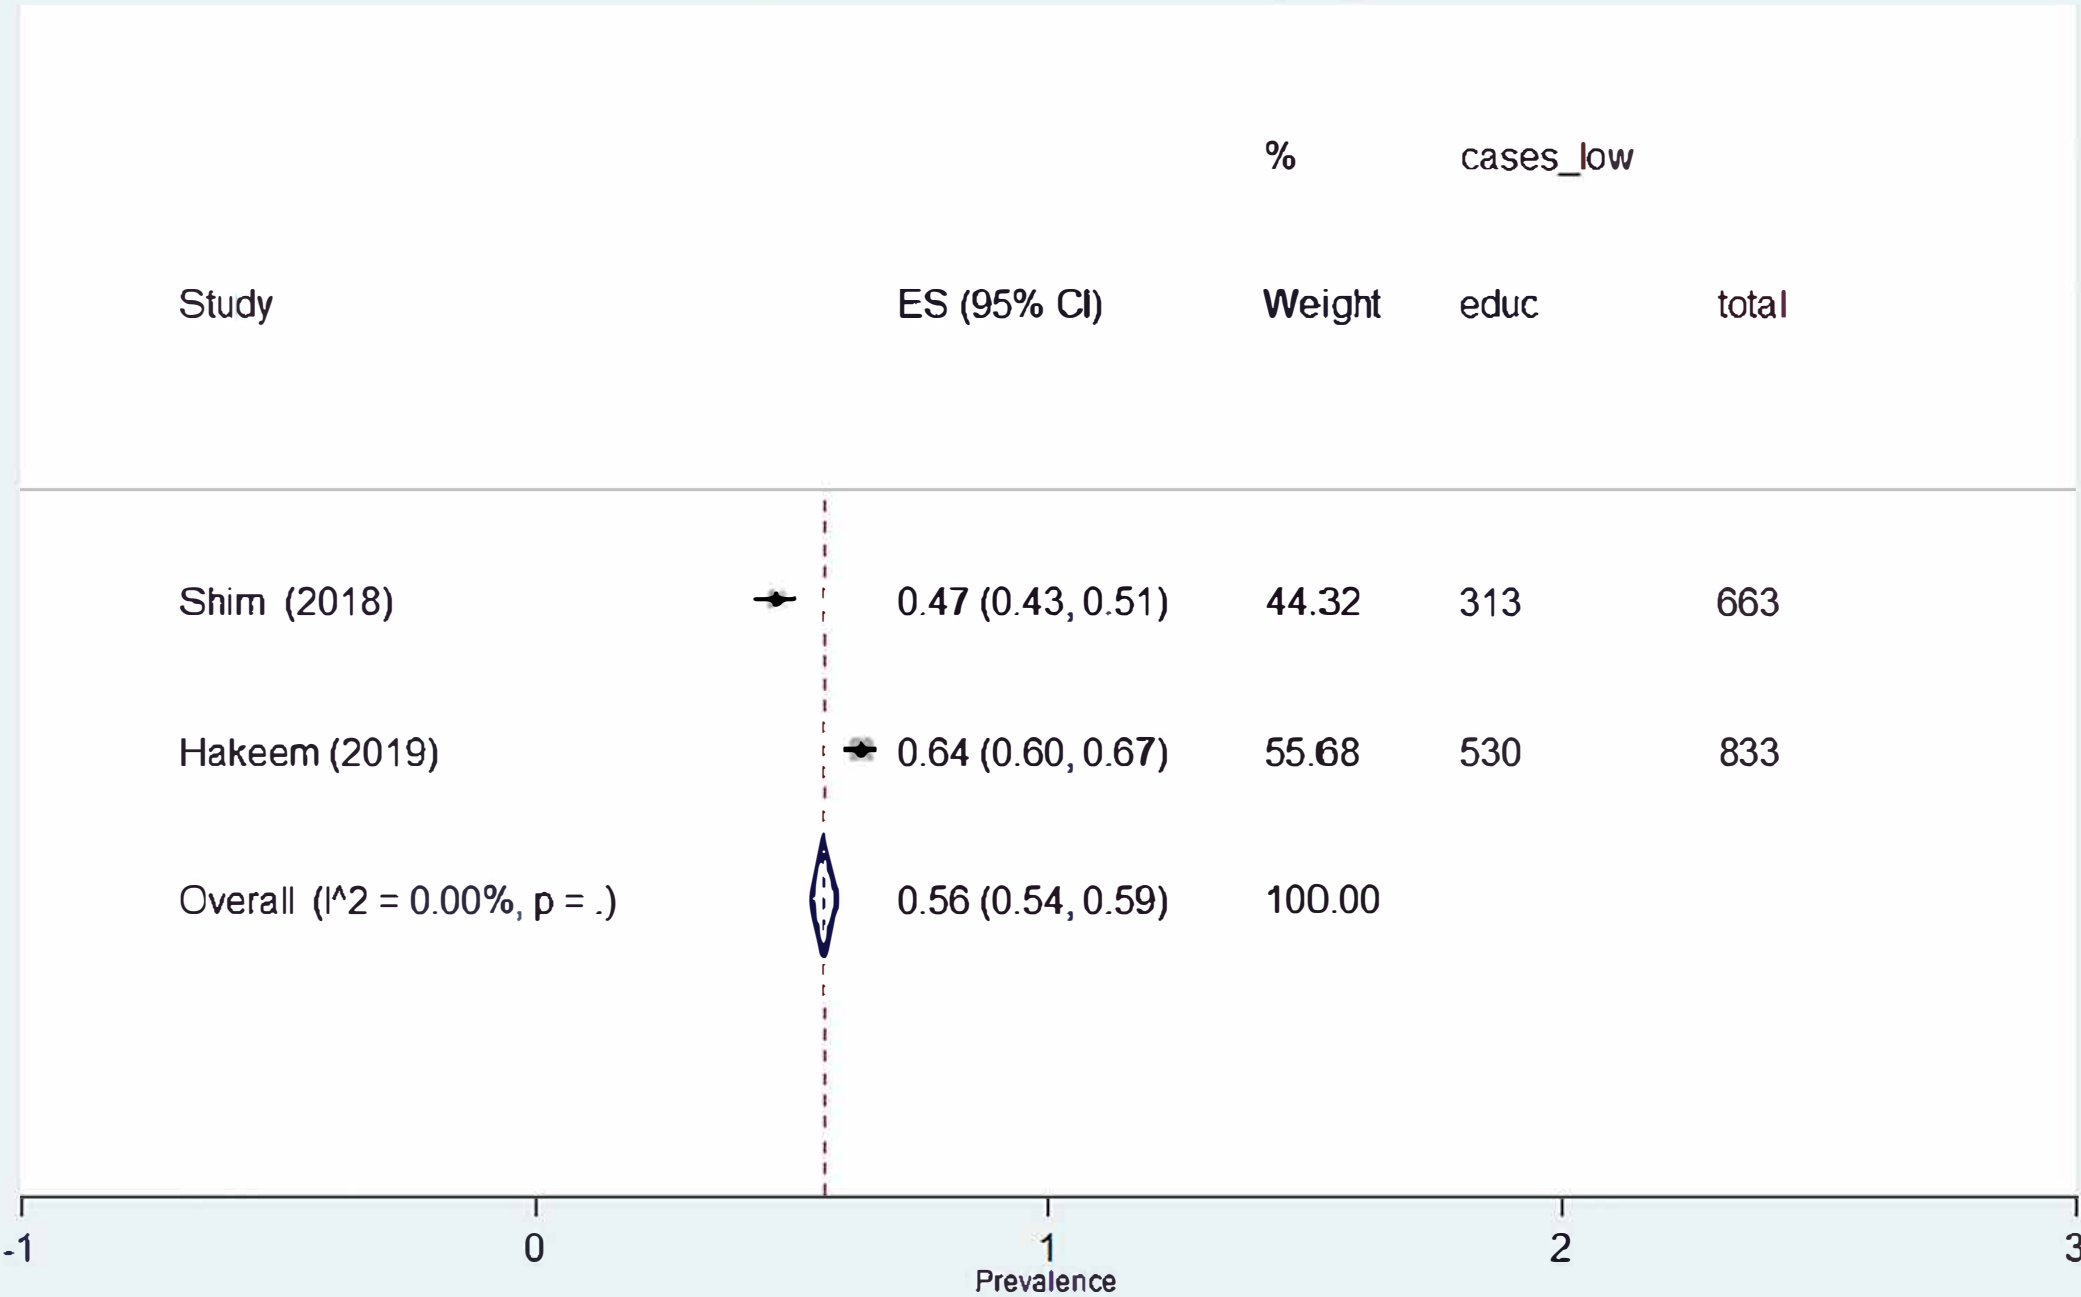

# Periodontitis in low-educated vs high-educated people

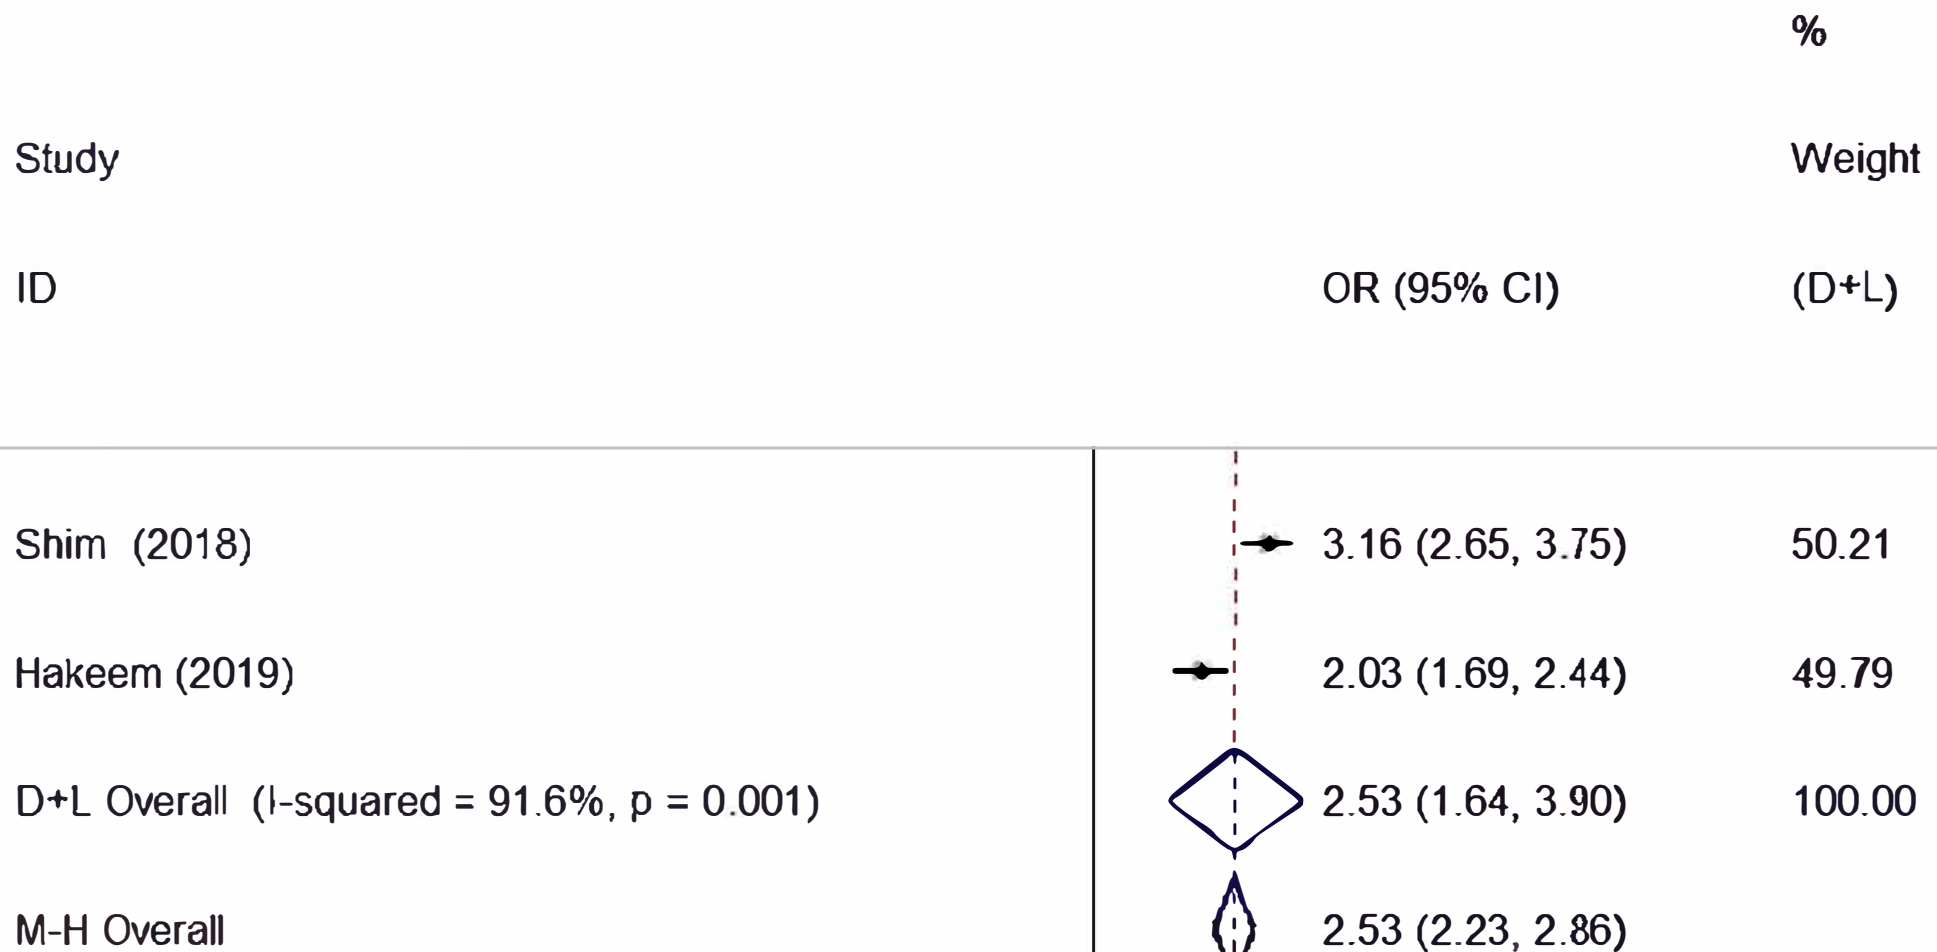

NOTE: Weights are from random effects analysis

.256

1

3.9

# Edentulia in elderly

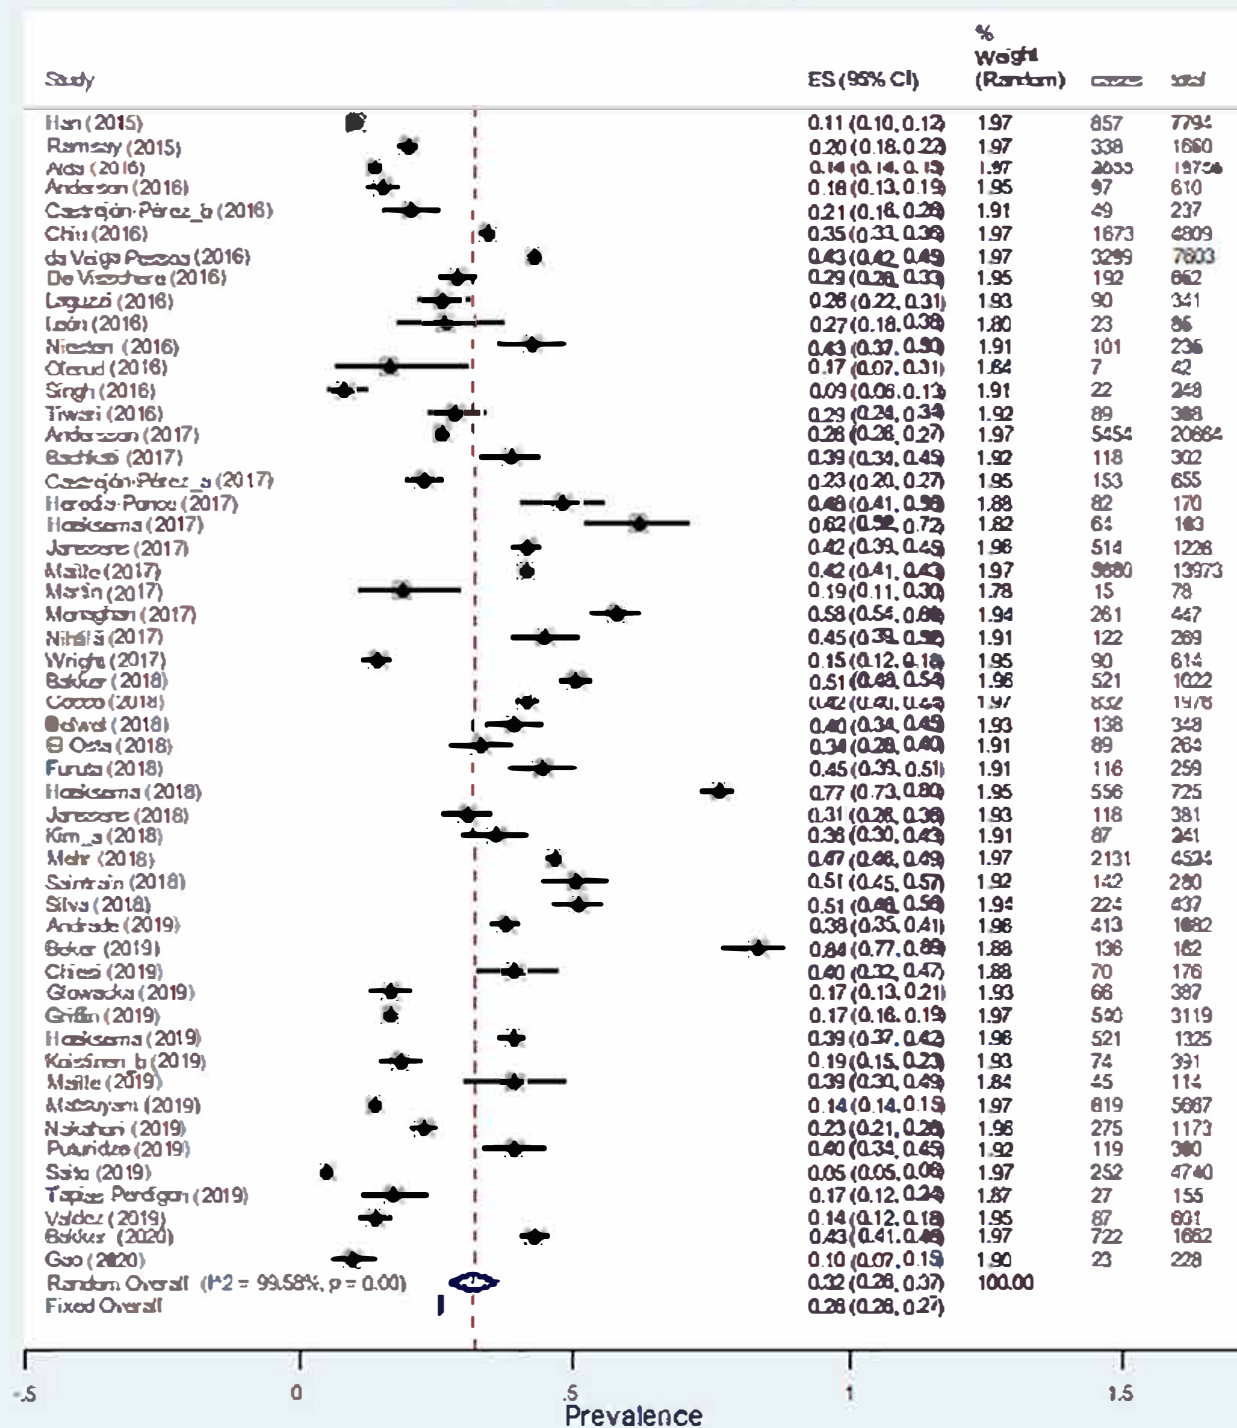



## Edentulism in low-educated people

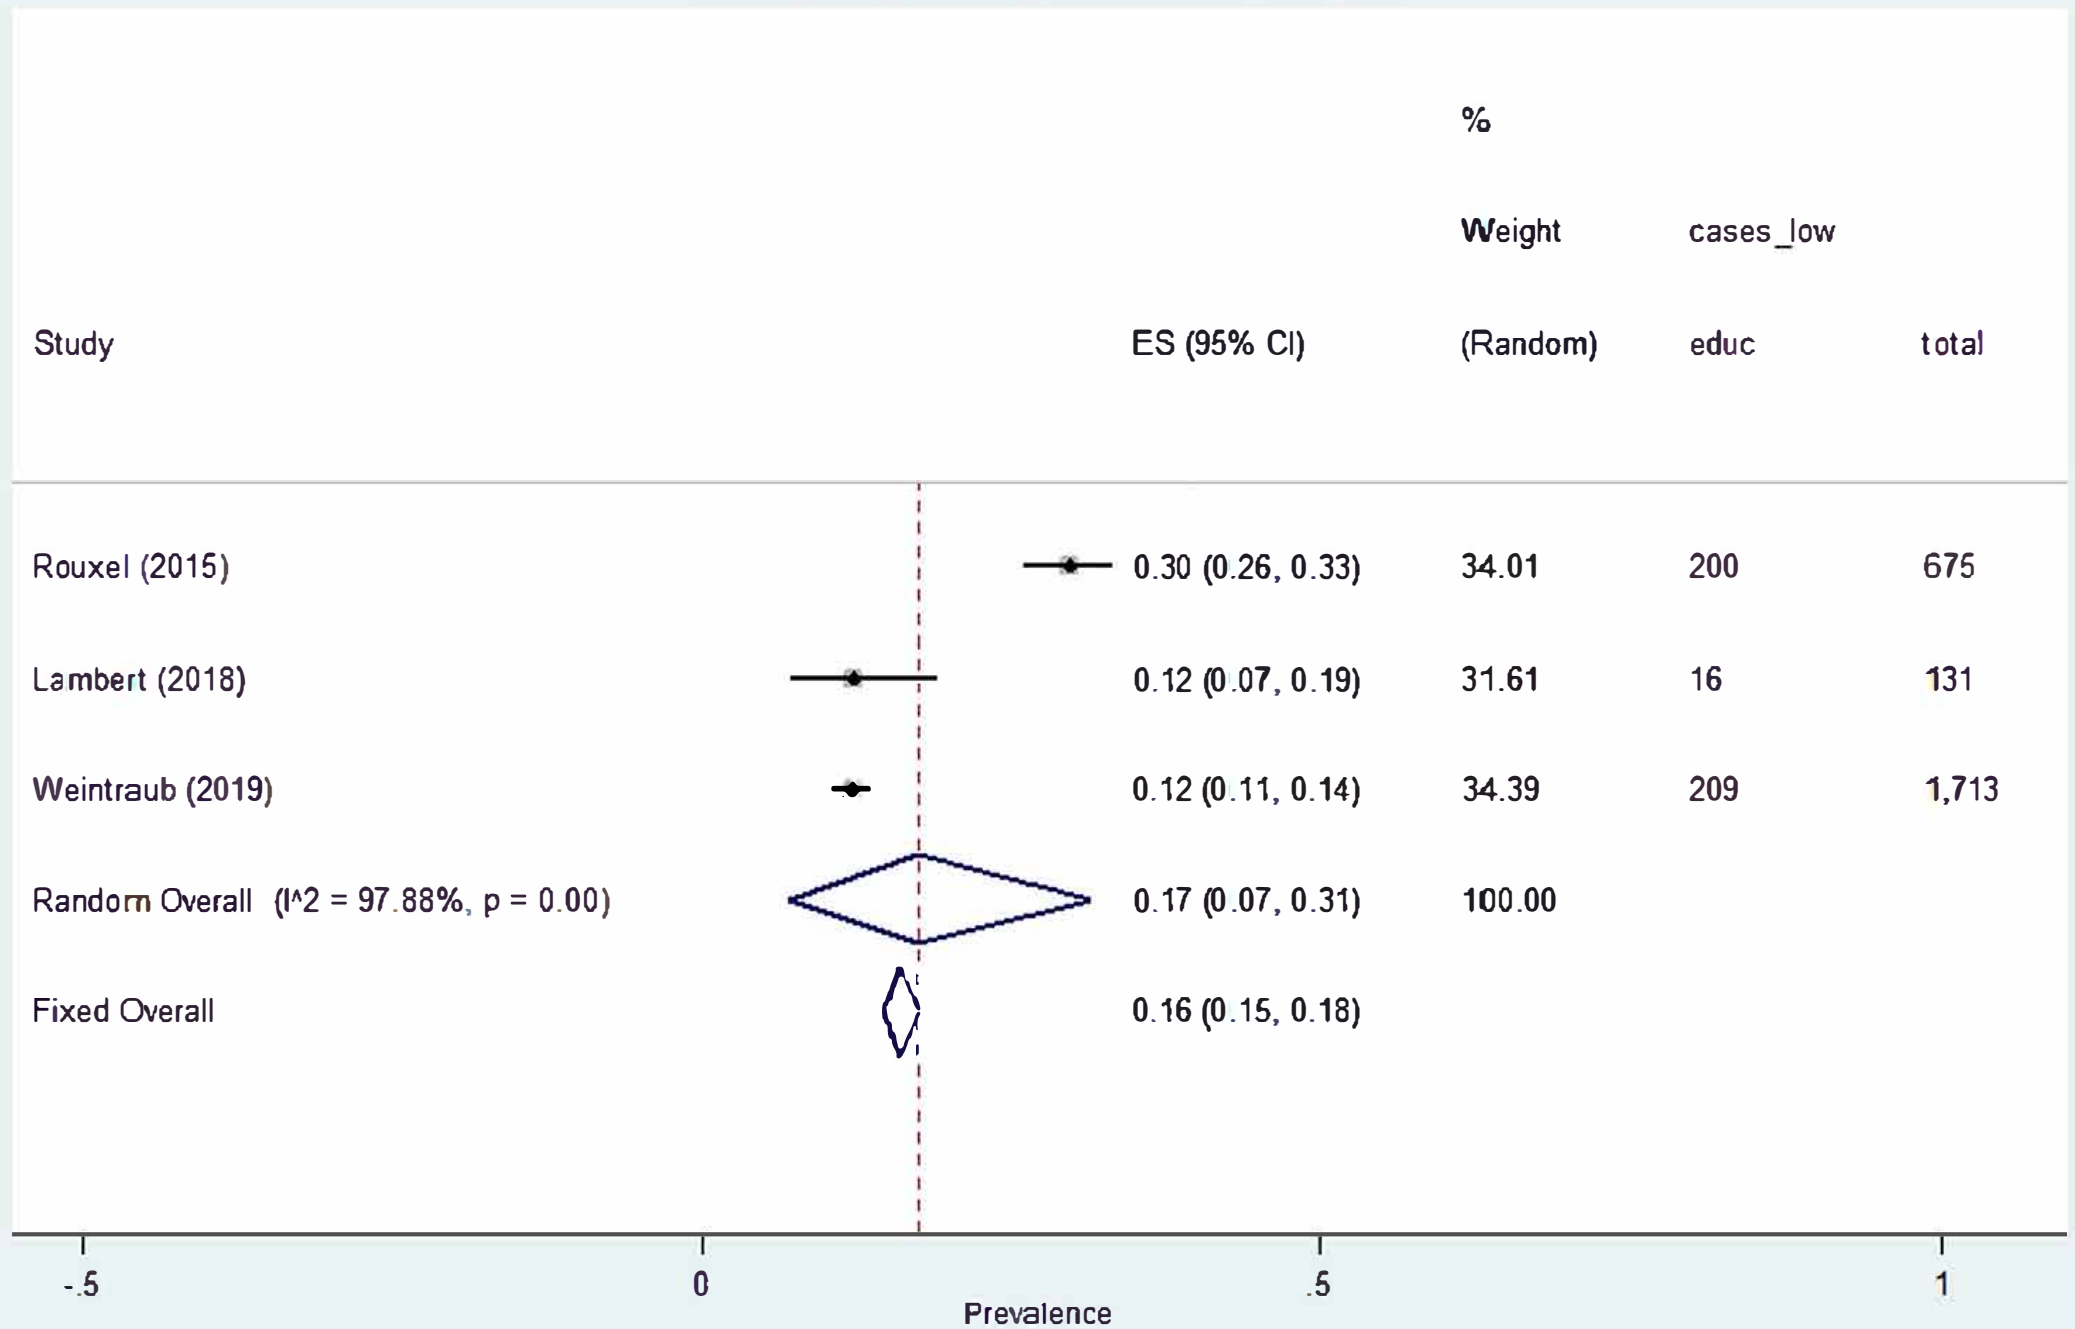

Edentulism in low-educated vs high-educated people

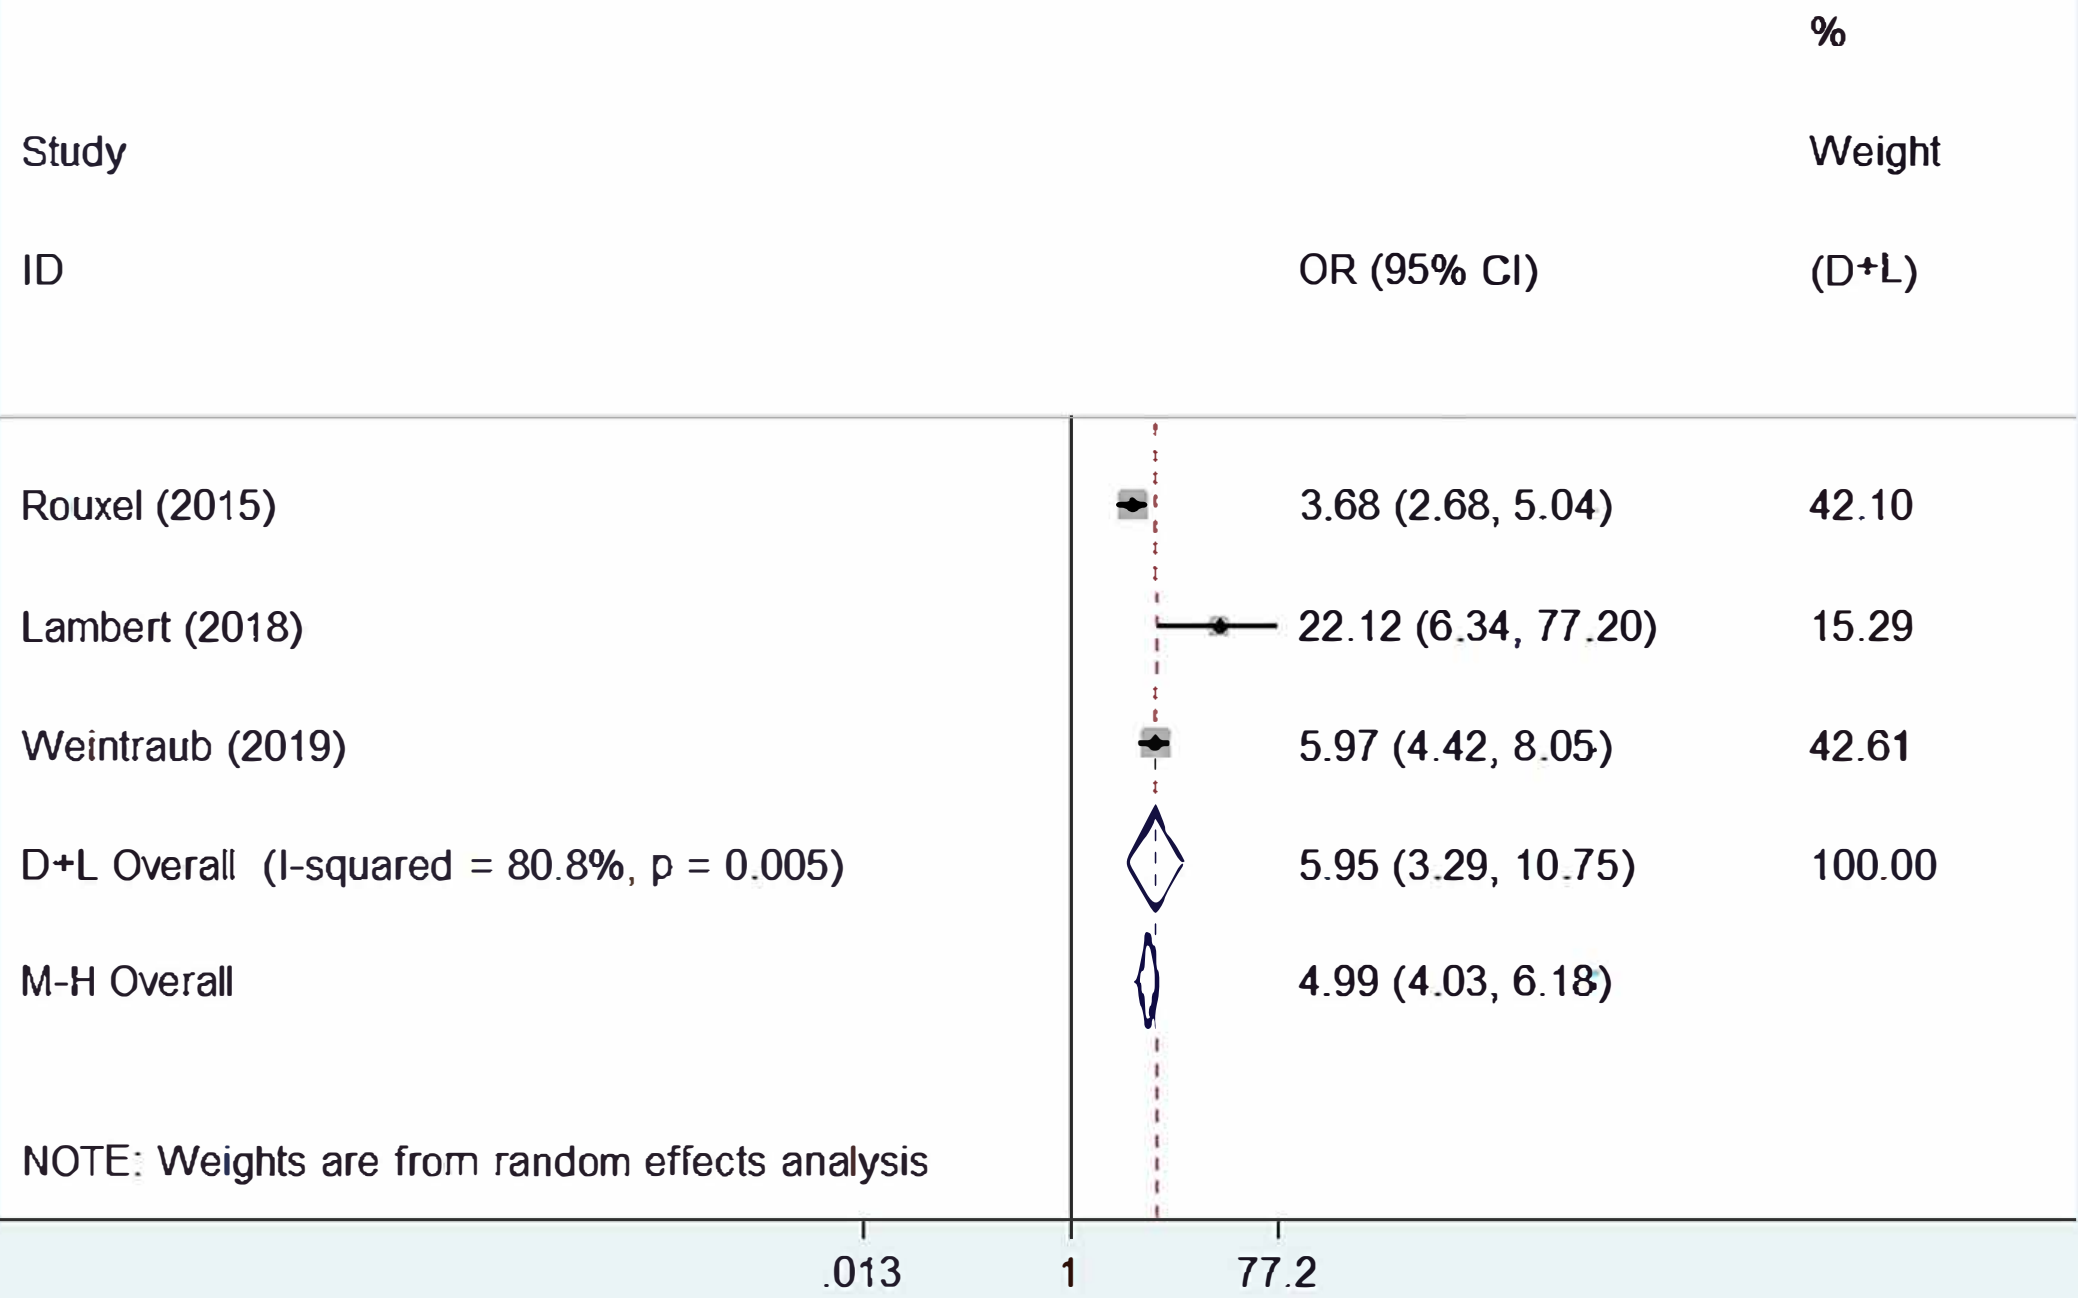

## Edentulism in drug abusers

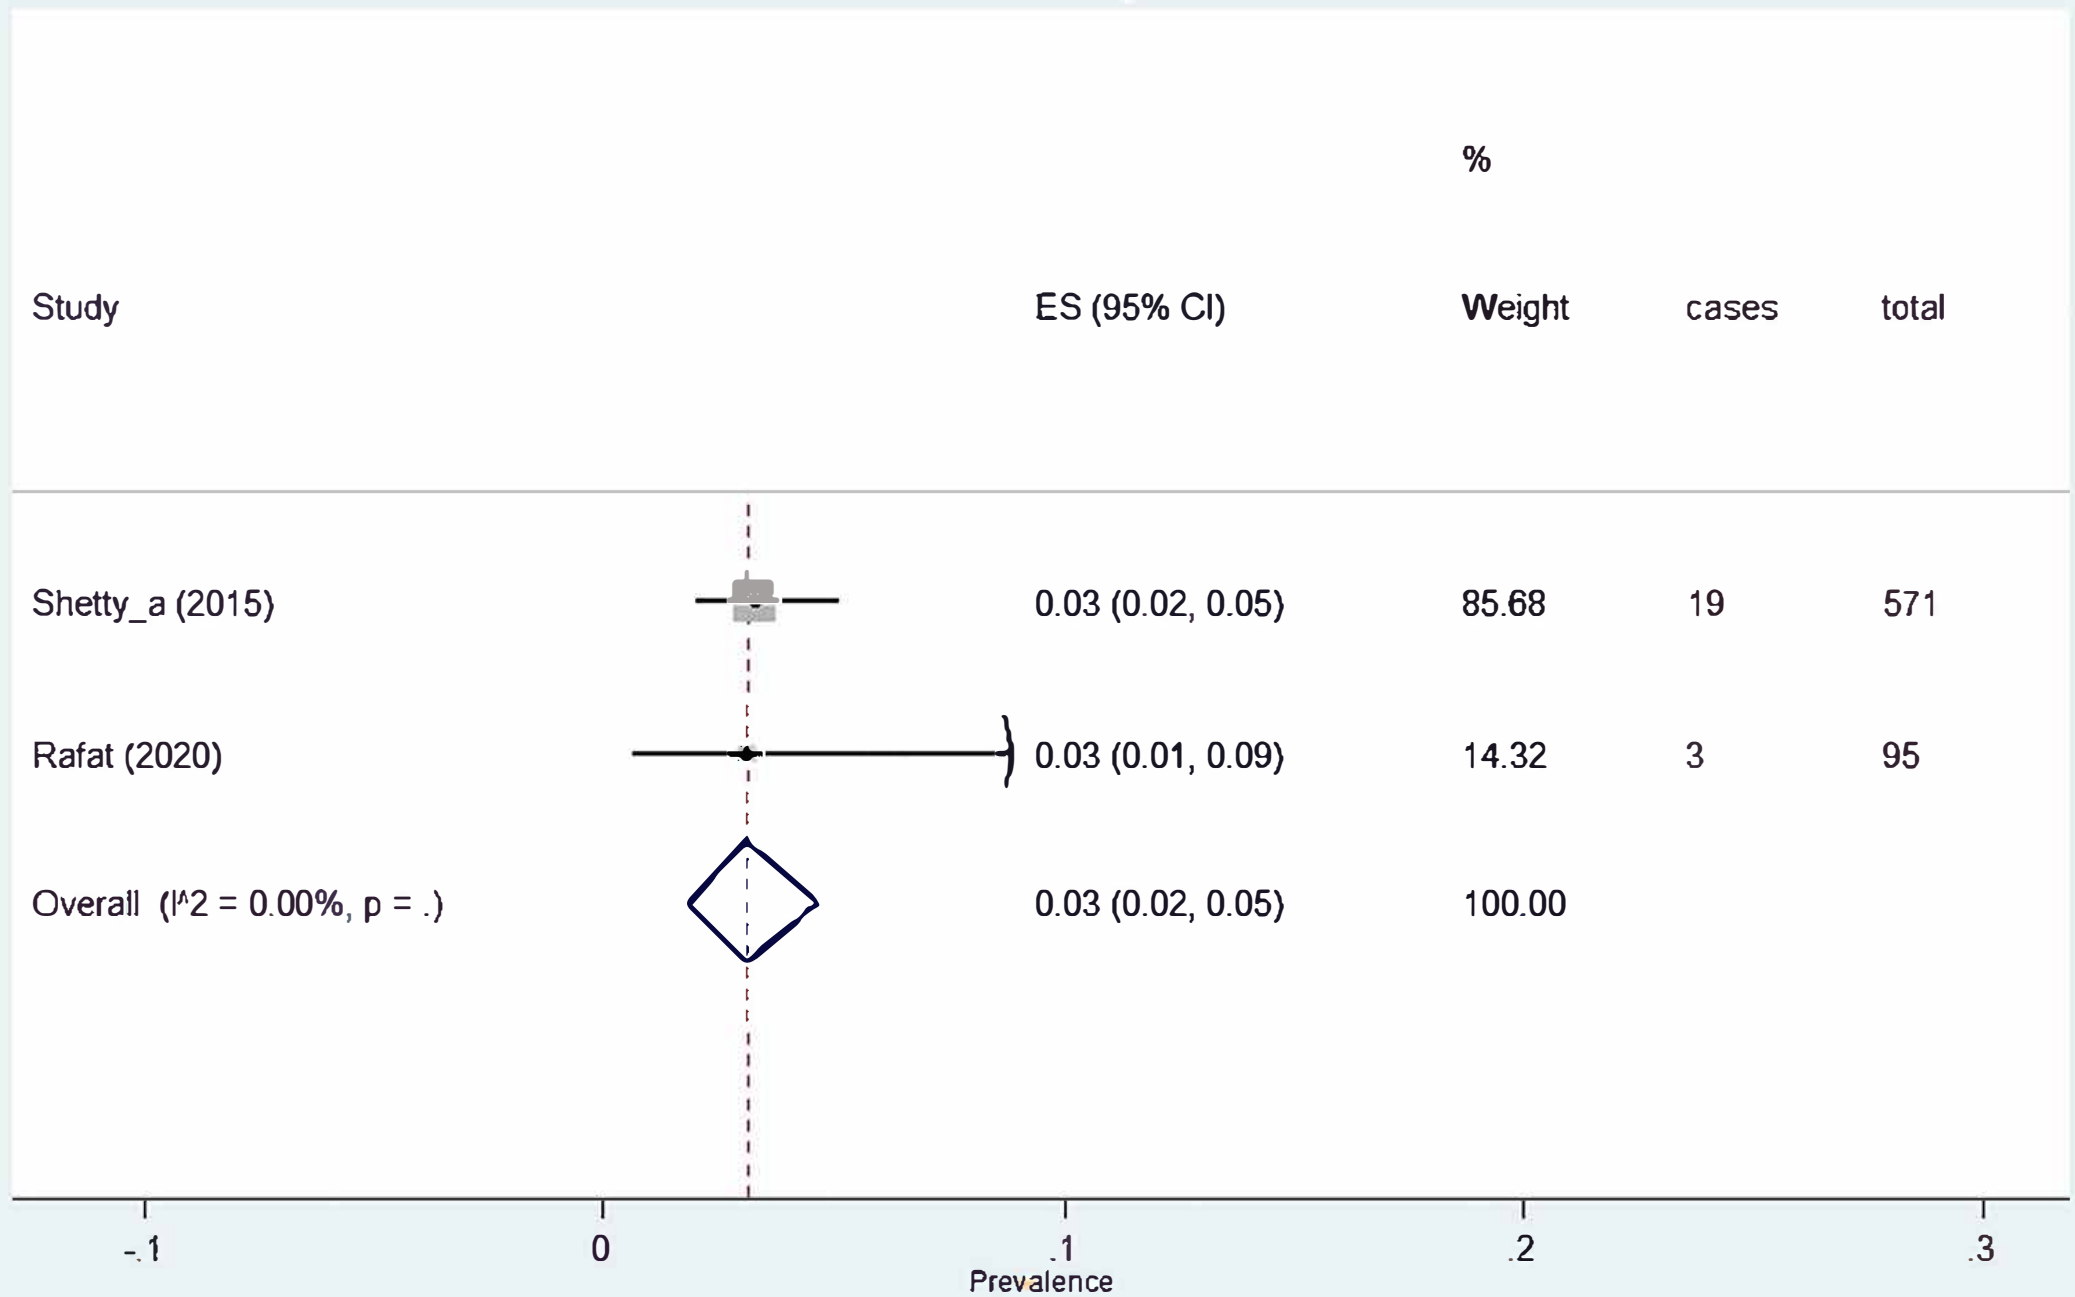

# Edentulia in elderly, by setting

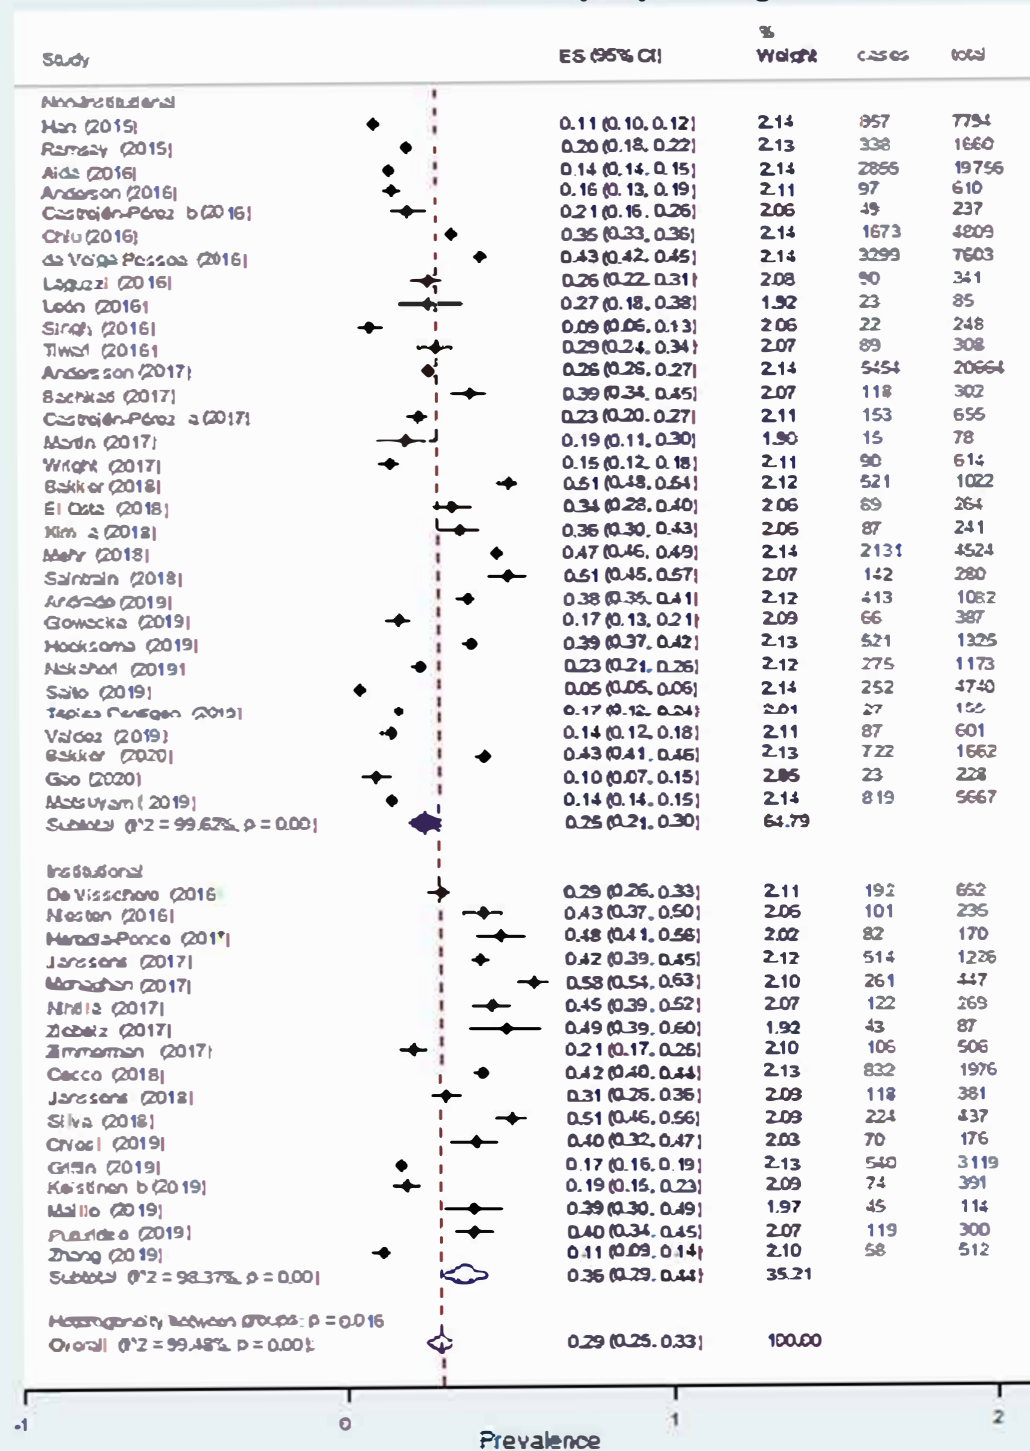

## Tooth loss (<=20 teeth) in elderly

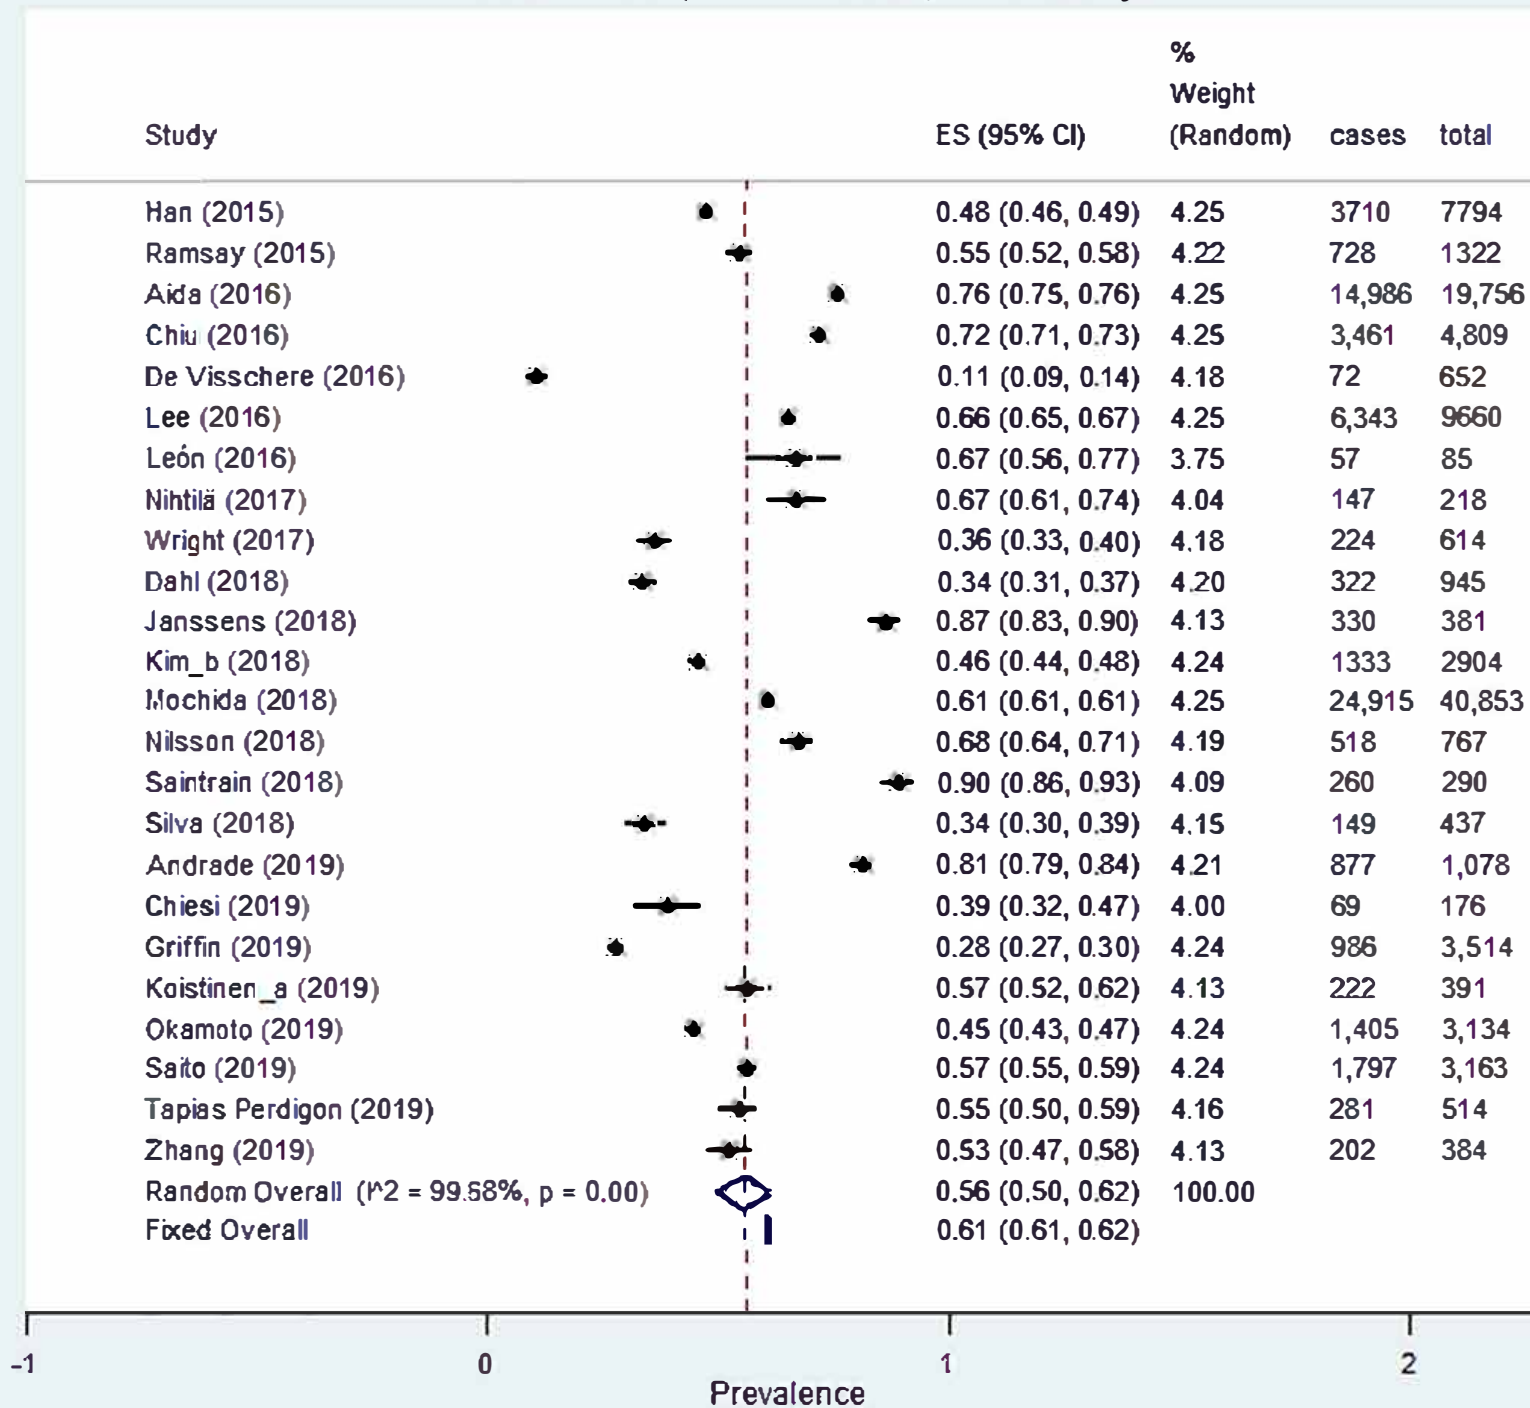

# Tooth loss (<=10 teeth) in elderly

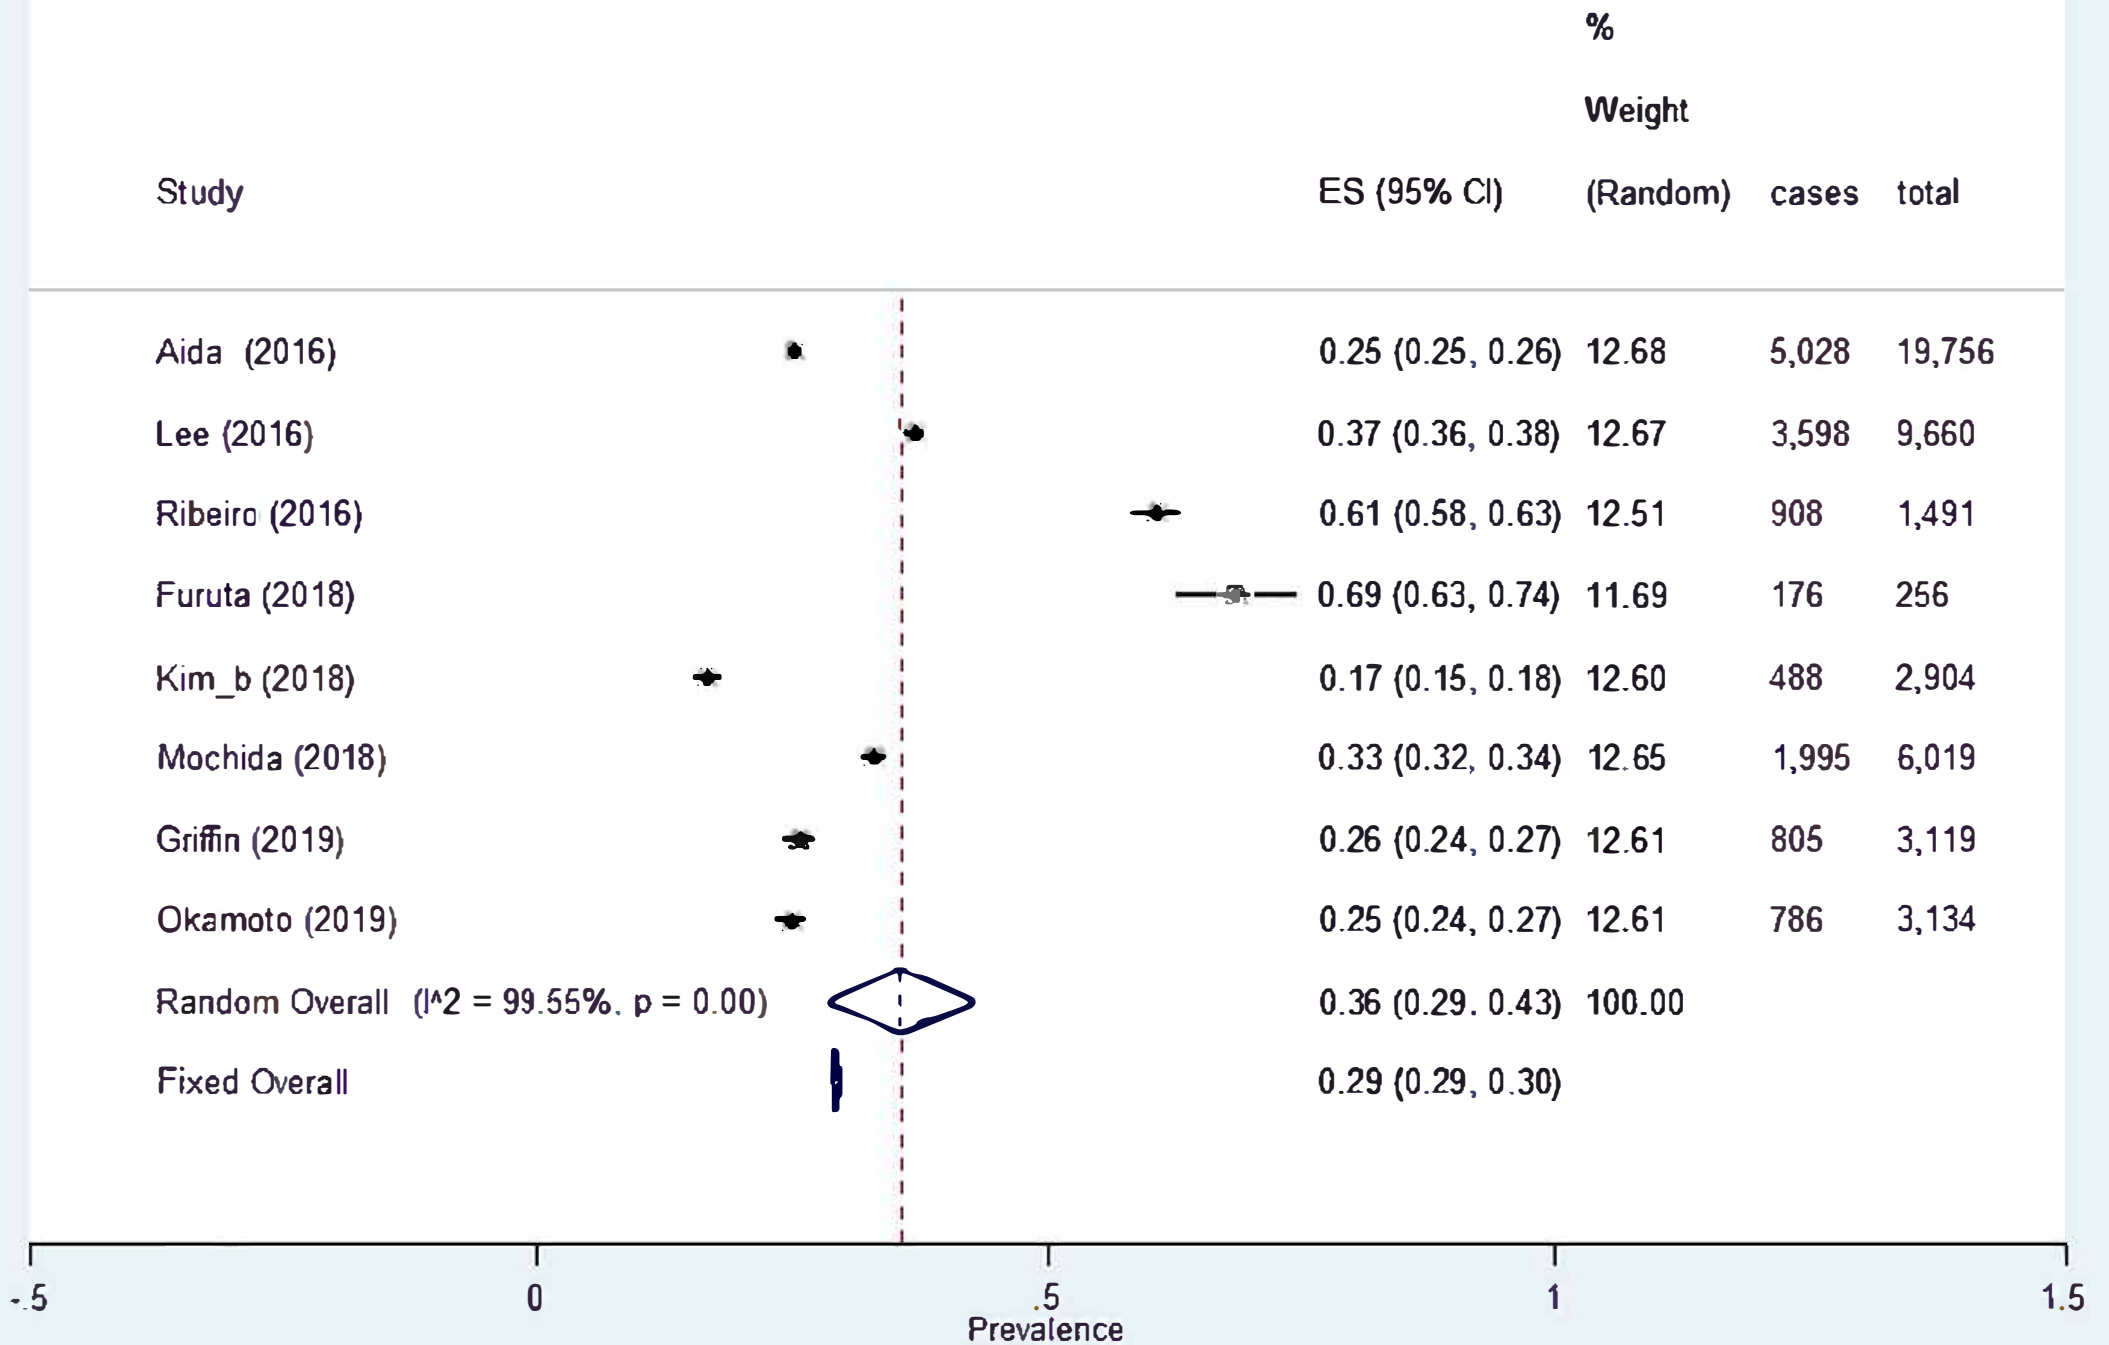

tooth loss(<21) and low income

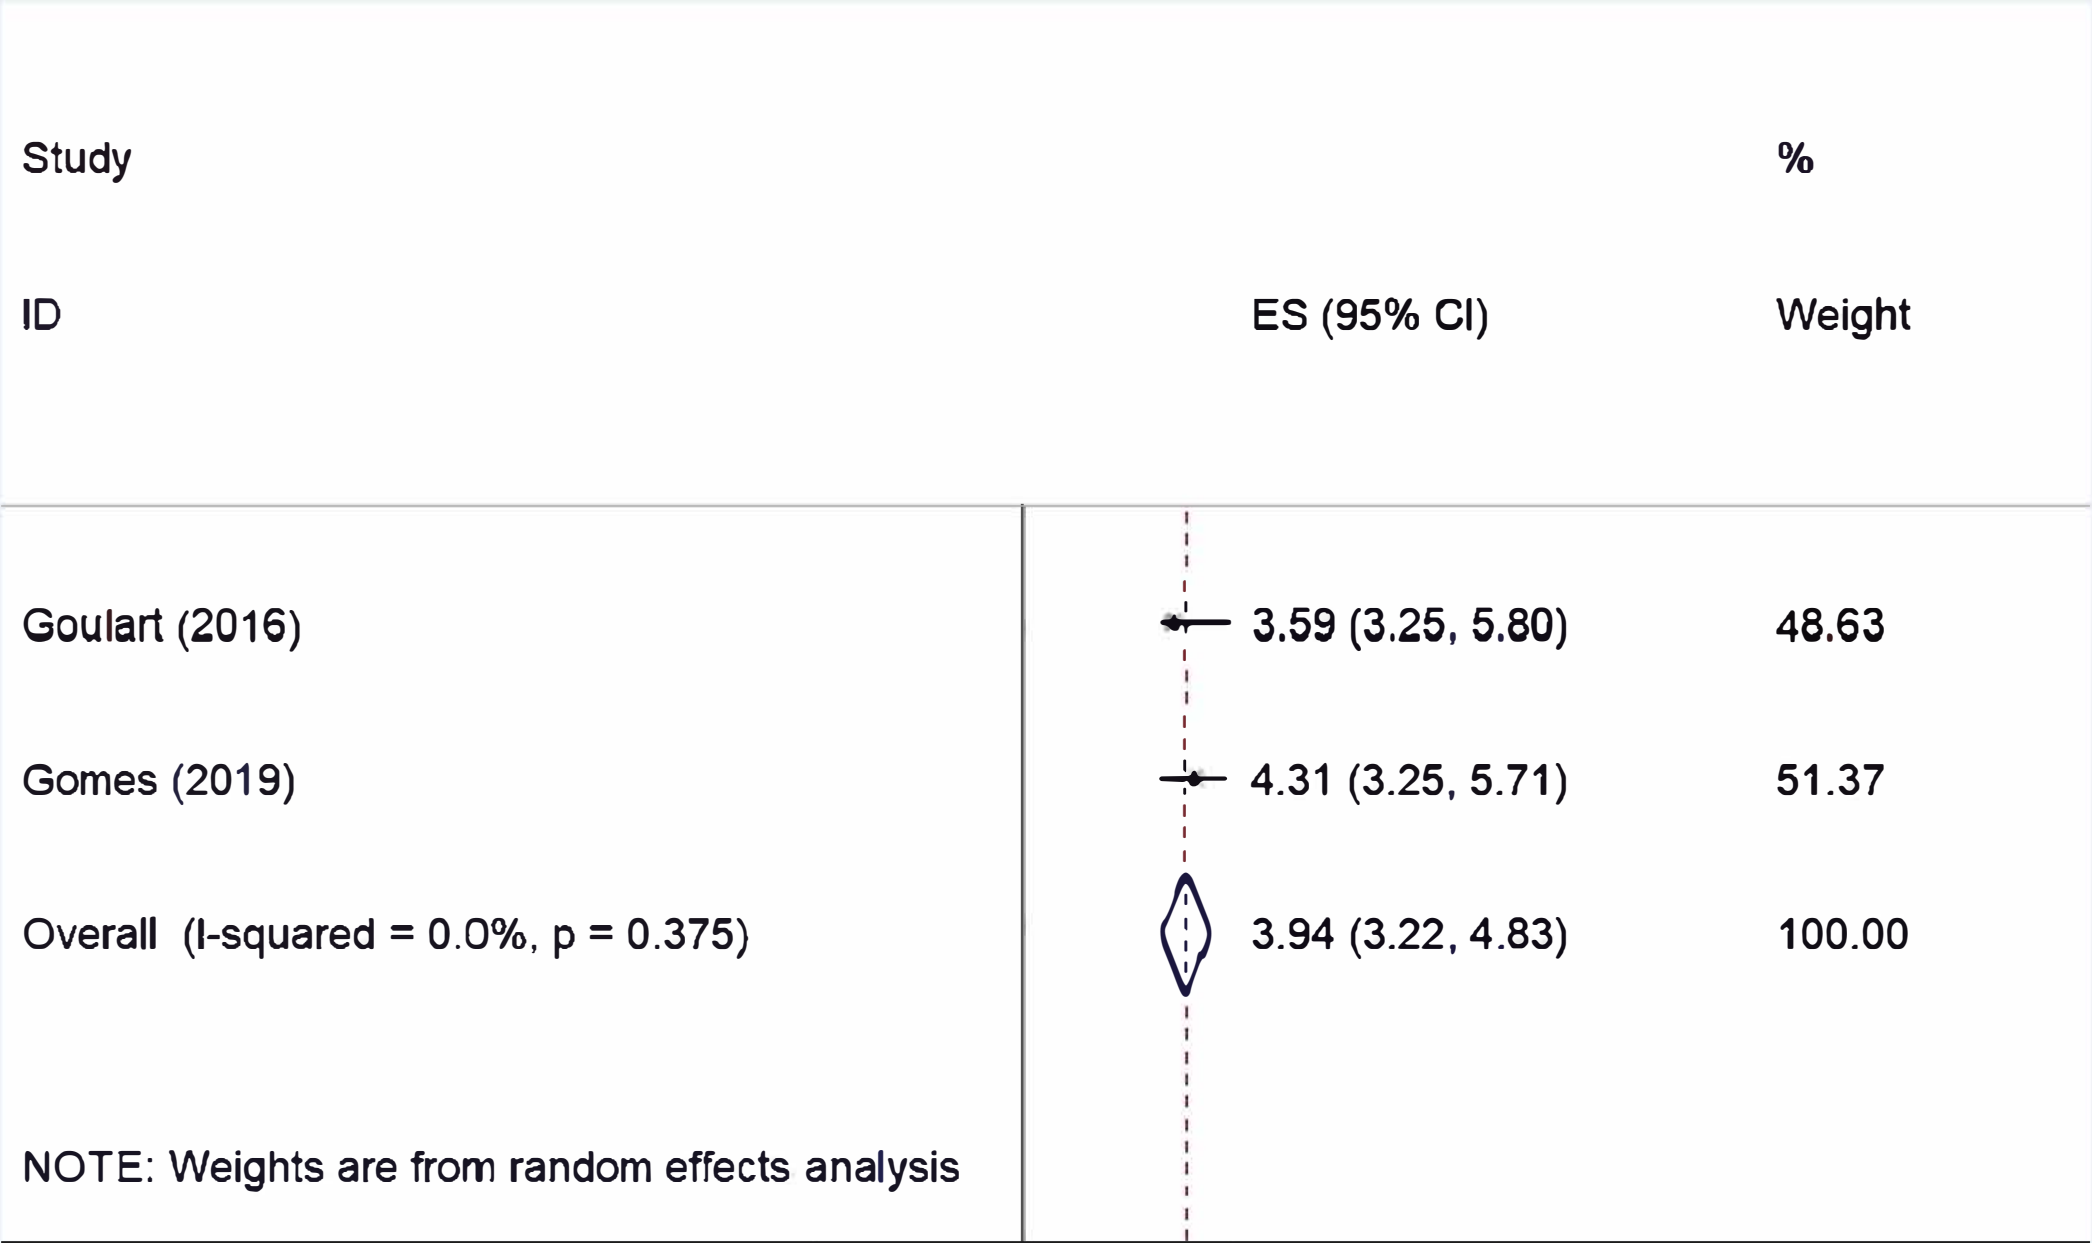

.172

1

5.8

tooth loss probability and education

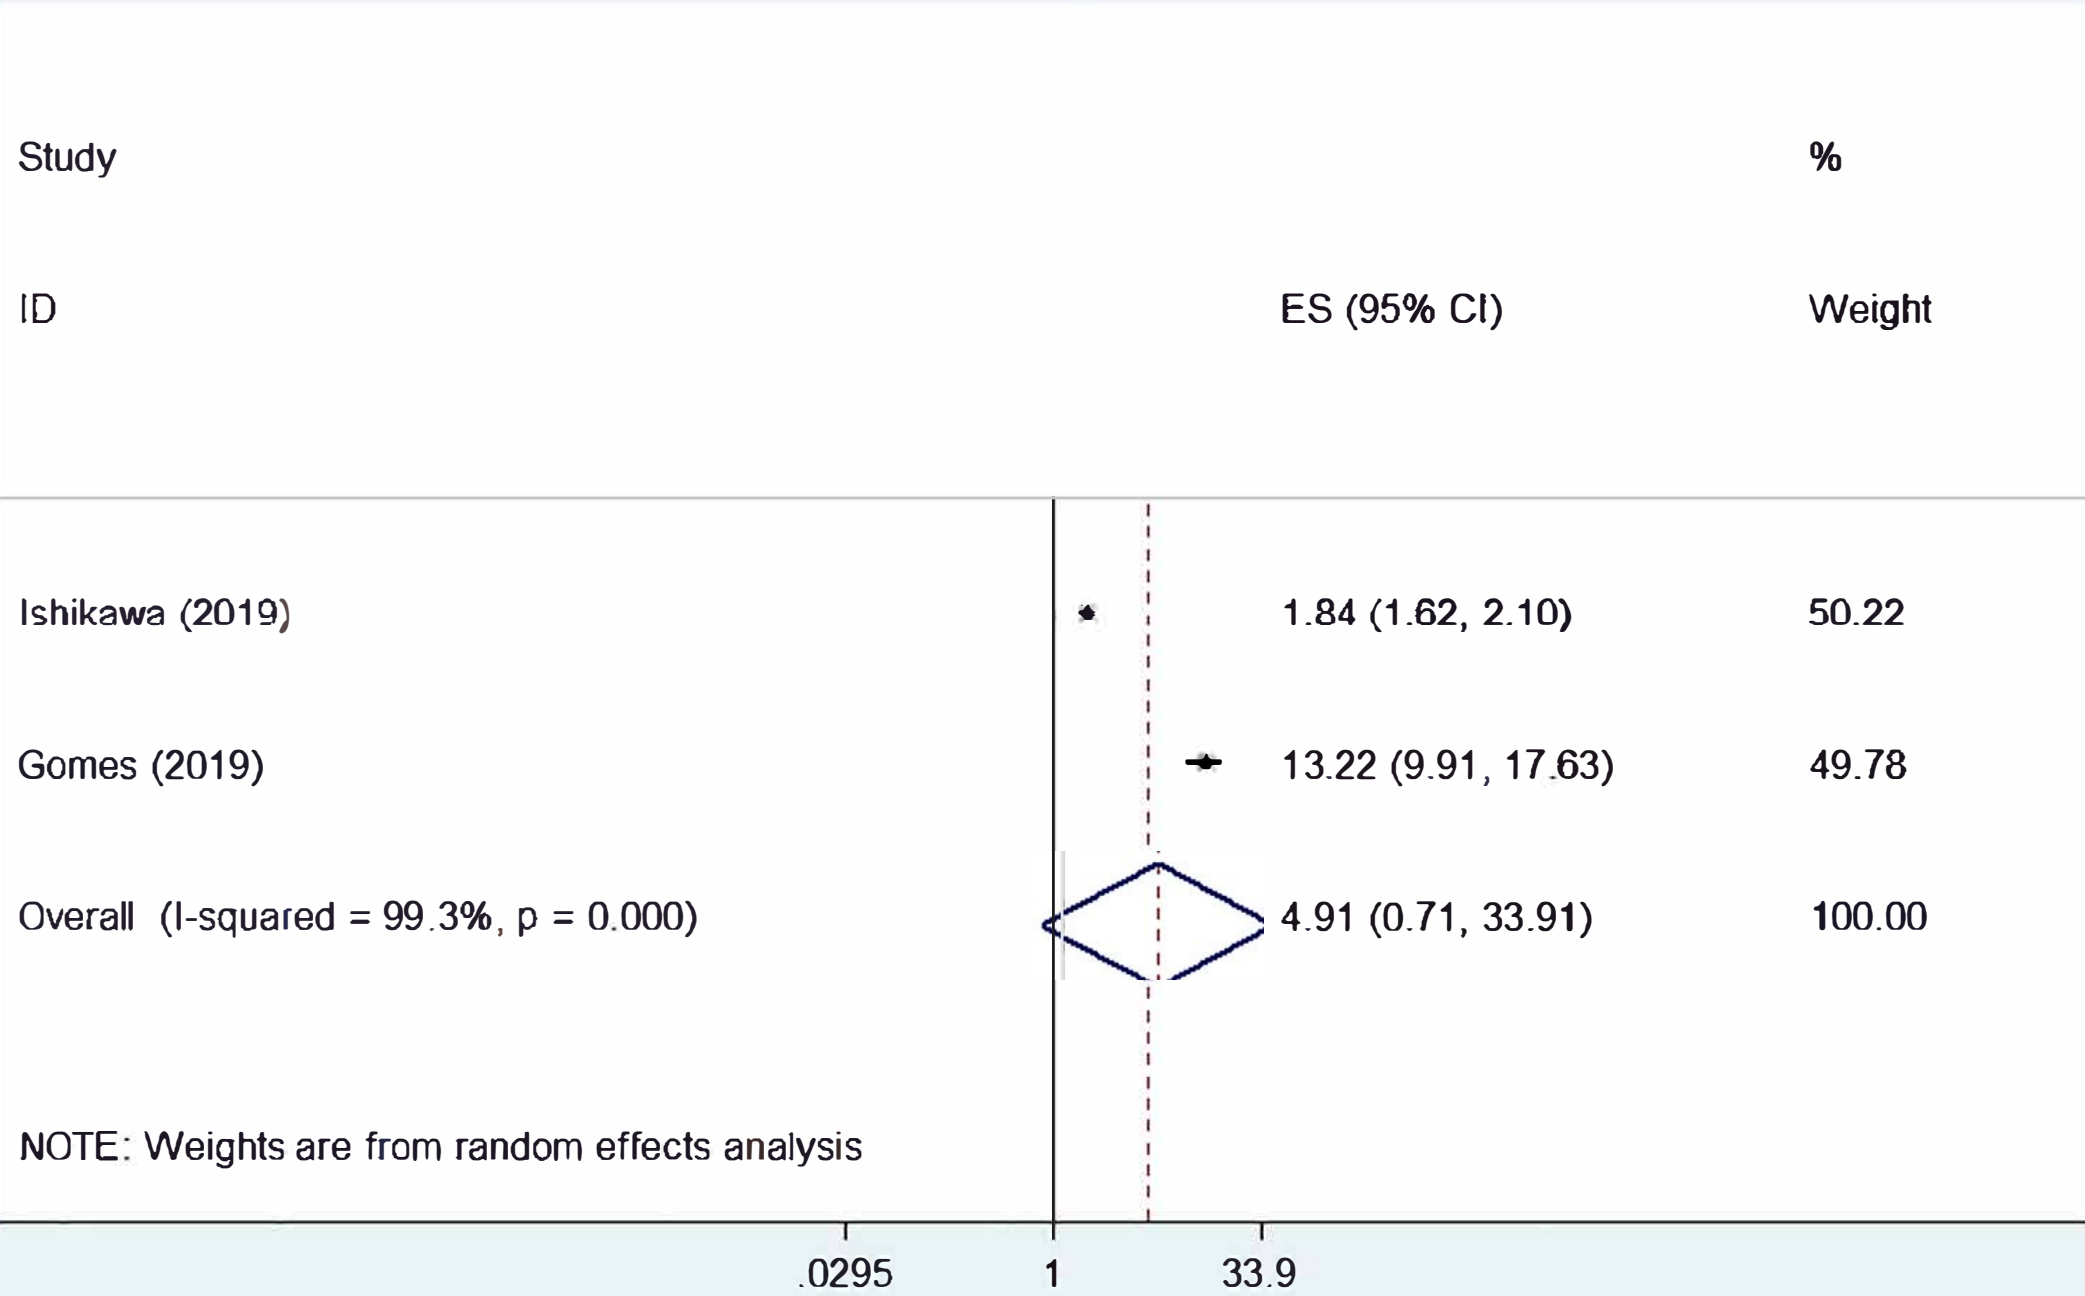



## Tooth loss ( $\leq 21$ teeth) and low education

Study

%

ID

ES (95% CI)

Weight

Rodriguez \_men (2017)

3.20 (1.16, 8.90)

25.76

Rodriguez\_women (2017)

3.20 (1.10, 12.10)

21.47

Nogueira (2019)

1.29 (1.15, 1.44)

52.77

Overall (I-squared = 61.2%,  $p = 0.076$ )

1.98 (0.97, 4.06)

100.00

NOTE: Weights are from random effects analysis

.0826

1

12.1

# Dental service attendance and pregnant women

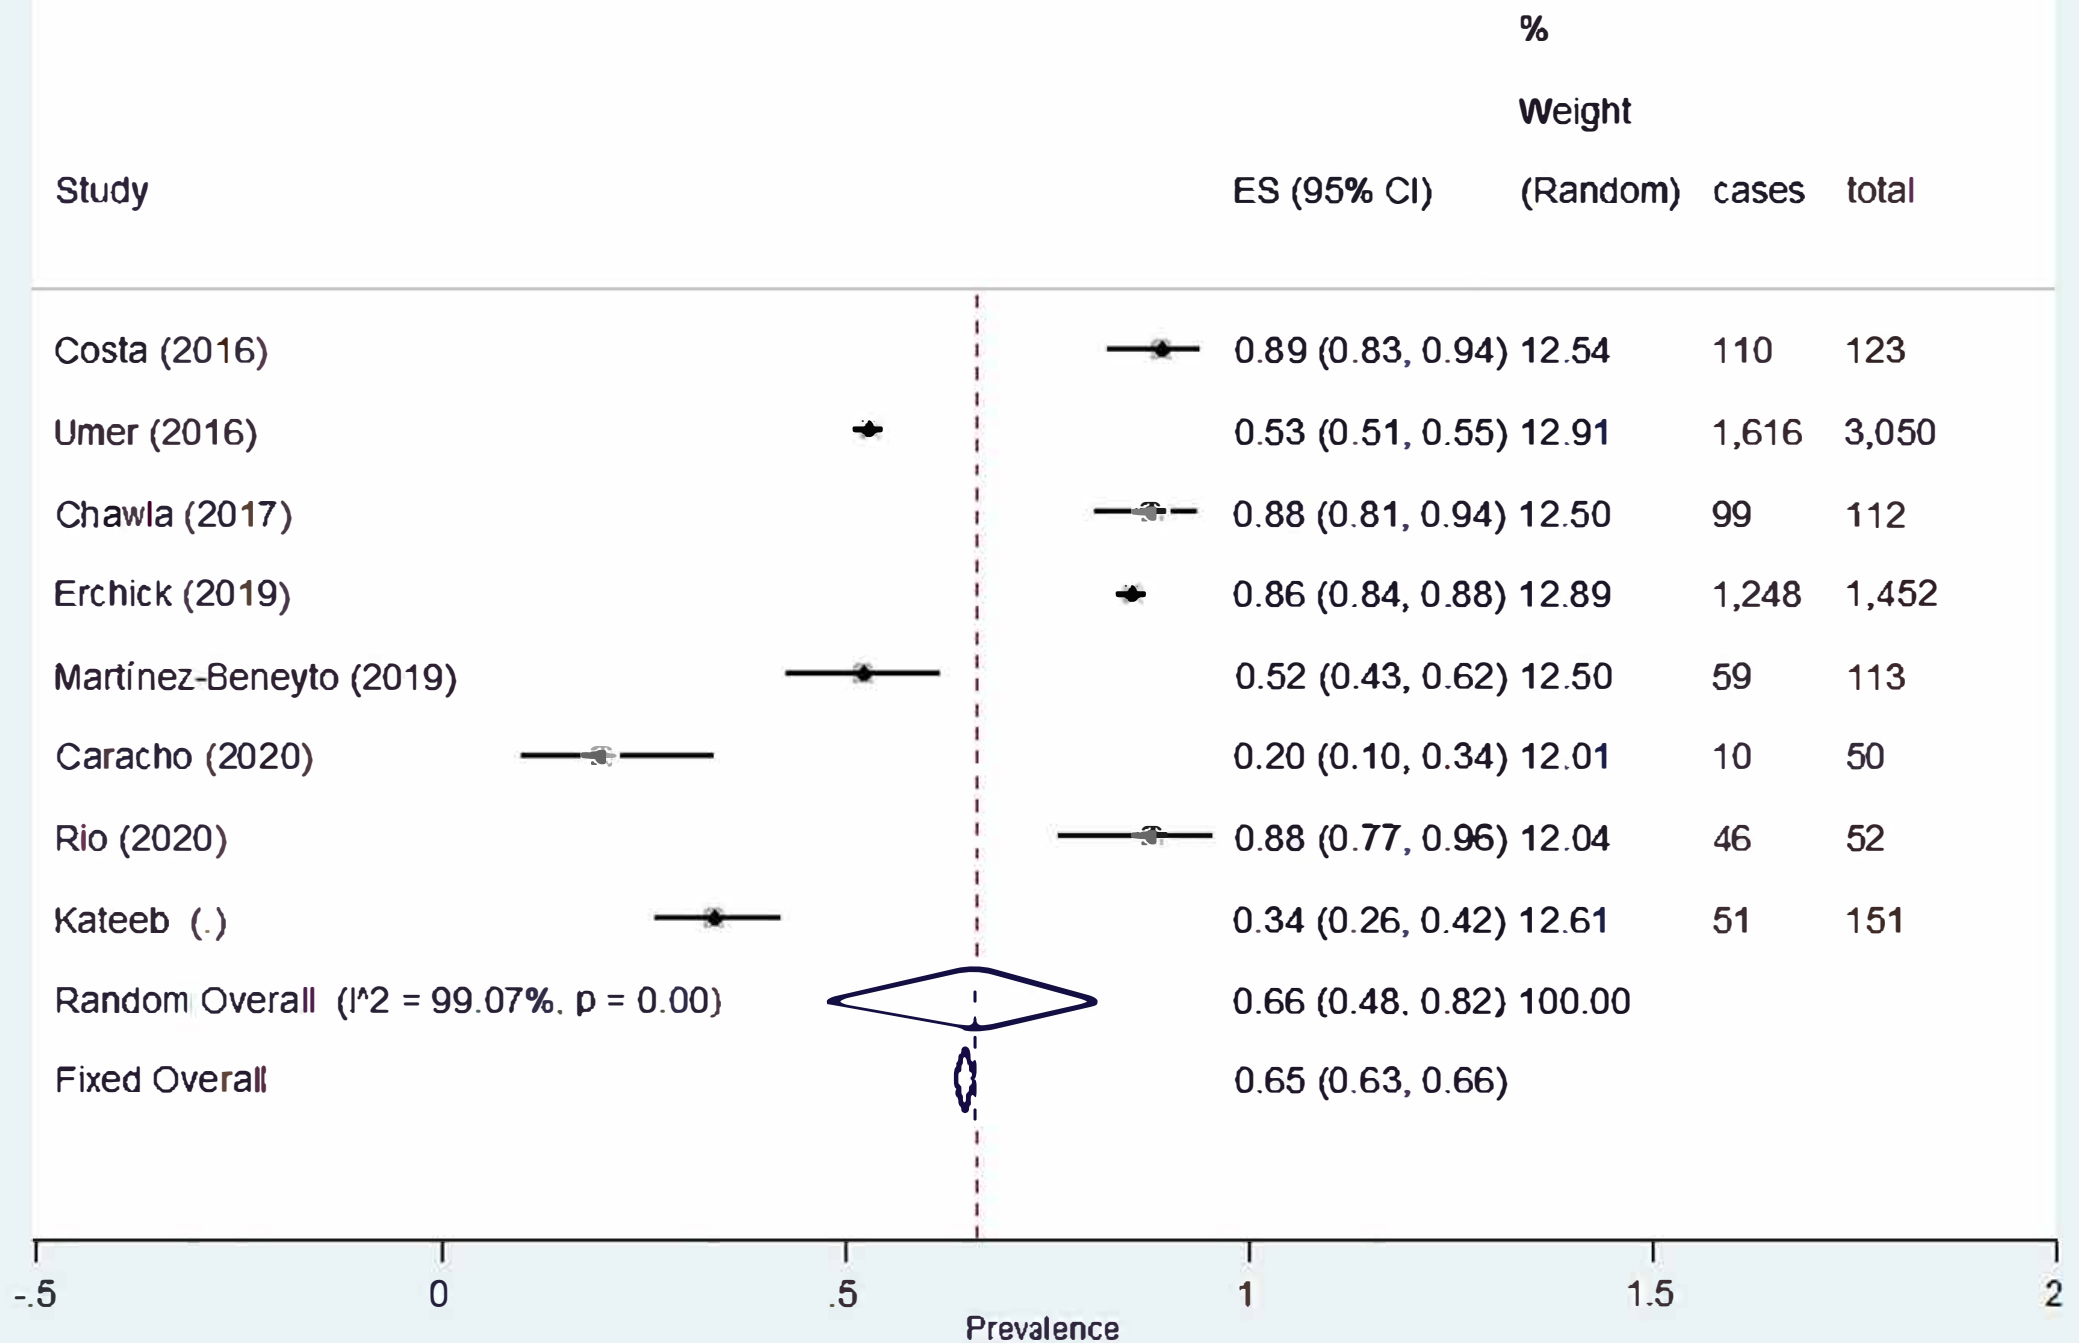

## Dental service attendance and elderly

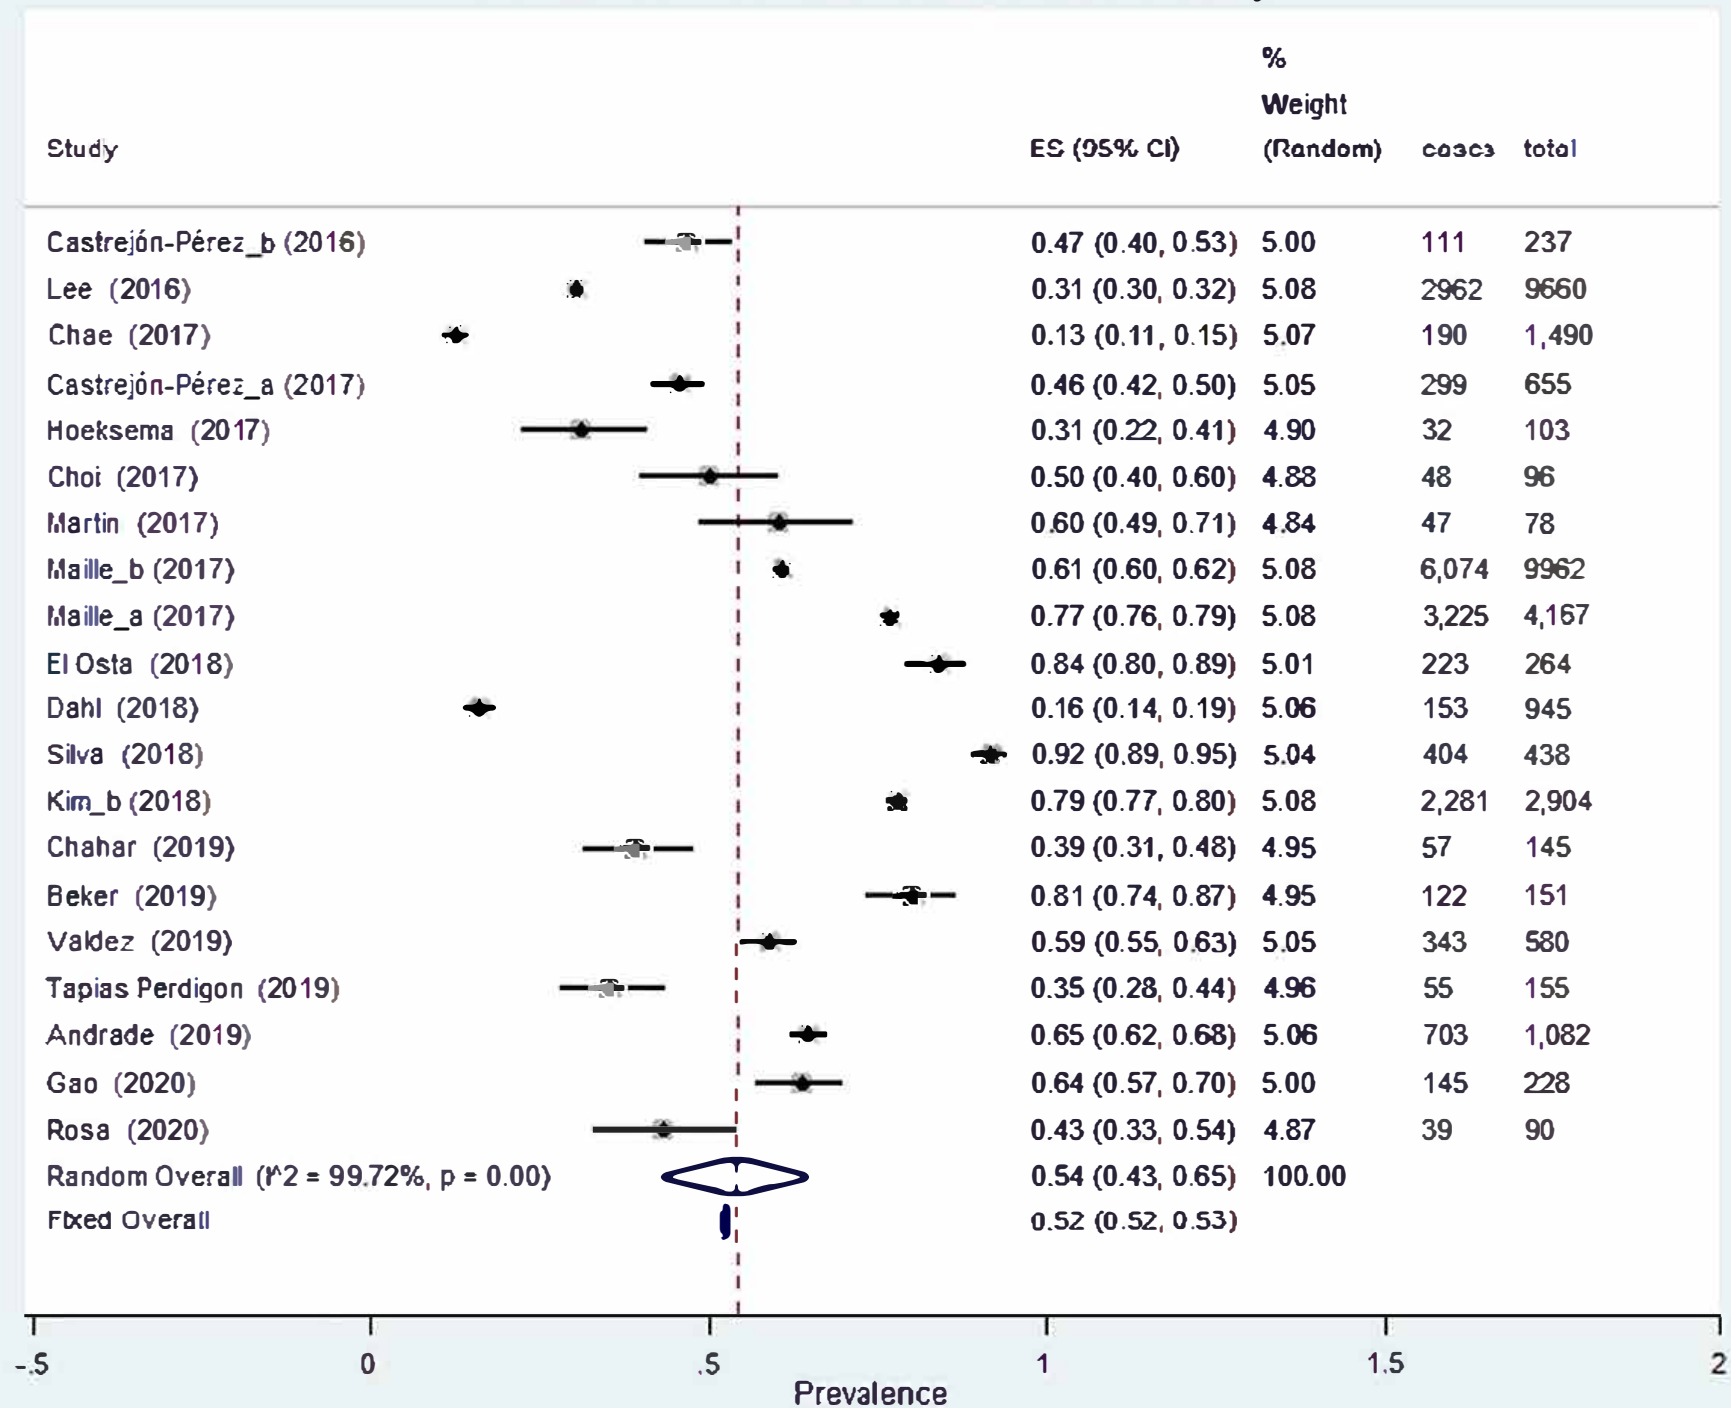

## Dental service attendance and low income

Study

%

ID

ES (95% CI)

Weight

Lee (2016)

1.65 (1.48, 1.85)

29.22

Calvasina (2016)

3.67 (0.87, 15.46)

17.31

Berglund (2017)

5.80 (5.60, 6.09)

29.33

Akintobi (2018)

1.87 (0.84, 4.18)

24.13

Overall (I-squared = 99.3%, p = 0.000)

2.82 (1.11, 7.19)

100.00

NOTE: Weights are from random effects analysis

.0647

1

15.5

Regular Dental service attendance and non insured

| Study |             | %      |
|-------|-------------|--------|
| ID    | ES (95% CI) | Weight |

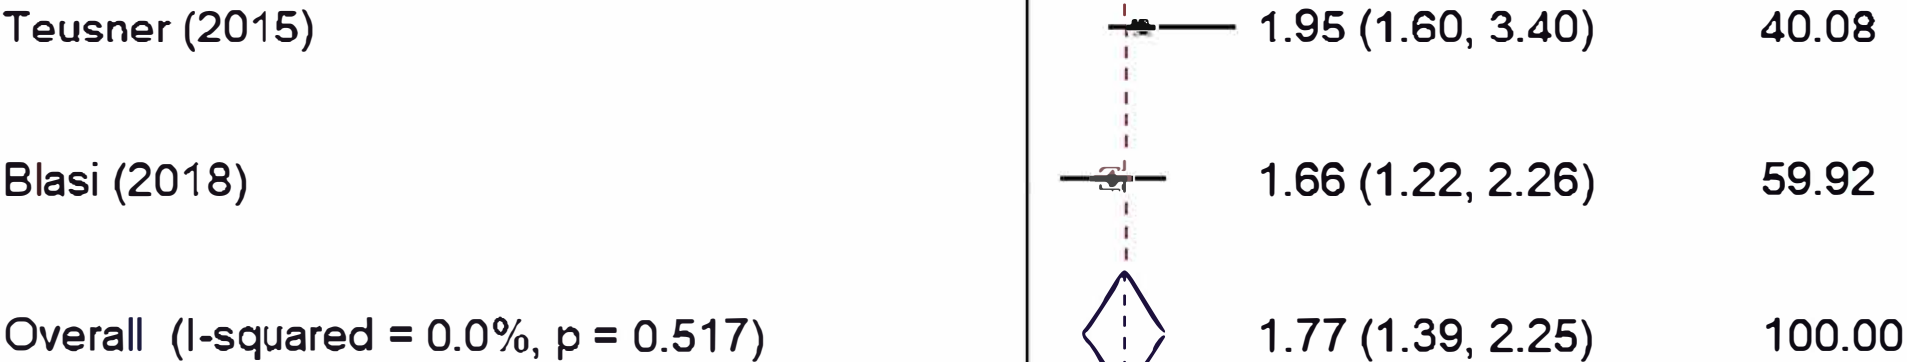

NOTE: Weights are from random effects analysis

## Low quality of life and elderly

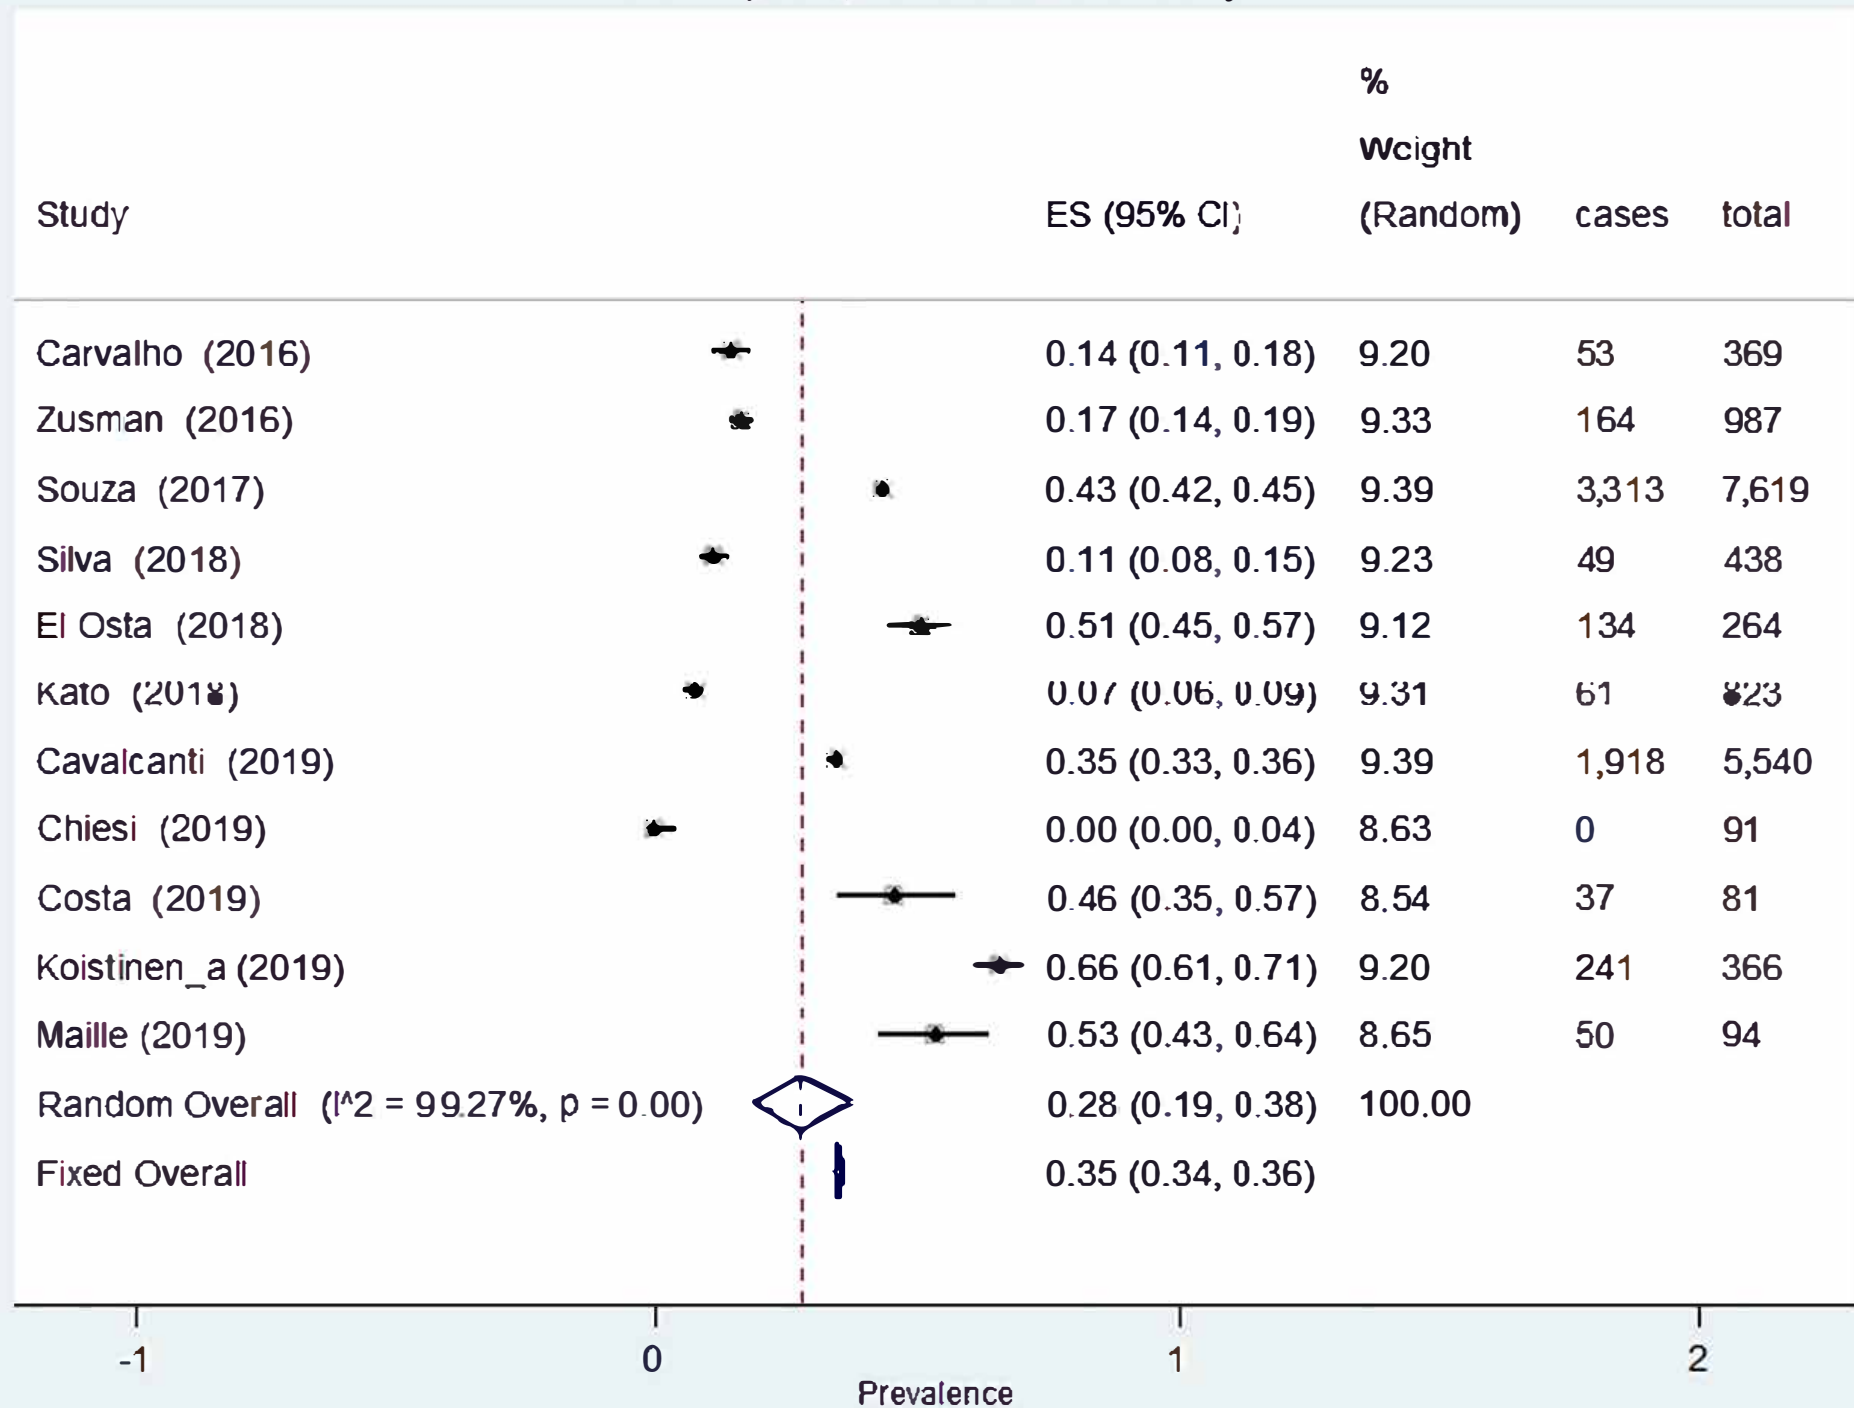

## Low perceived oral health and pregnant woman

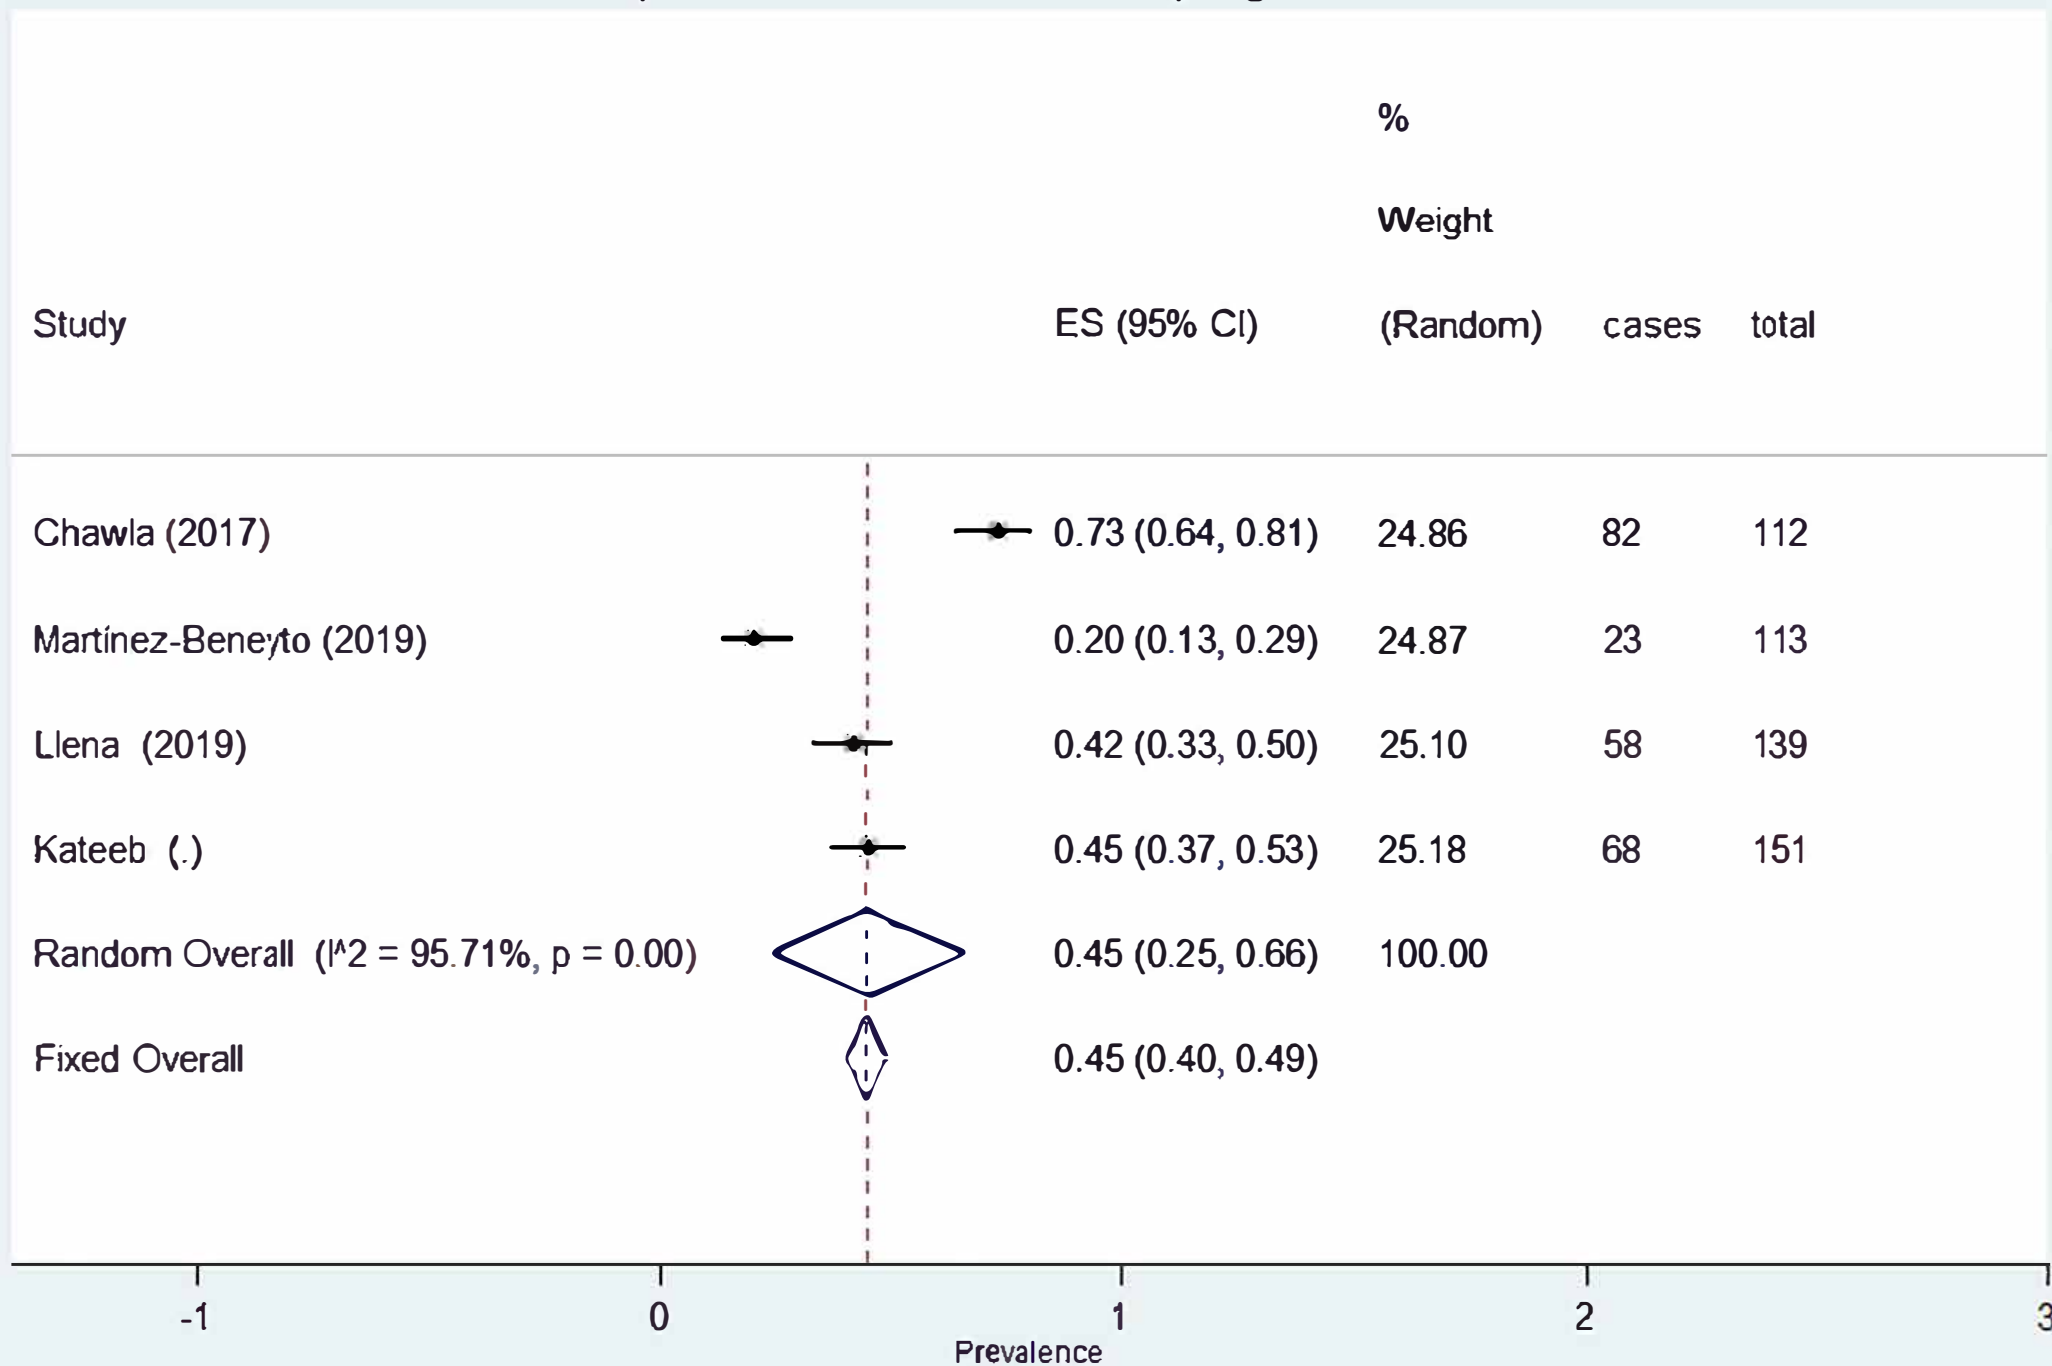

## Oral health and income

| Study |             |        | % |
|-------|-------------|--------|---|
| ID    | ES (95% CI) | Weight |   |

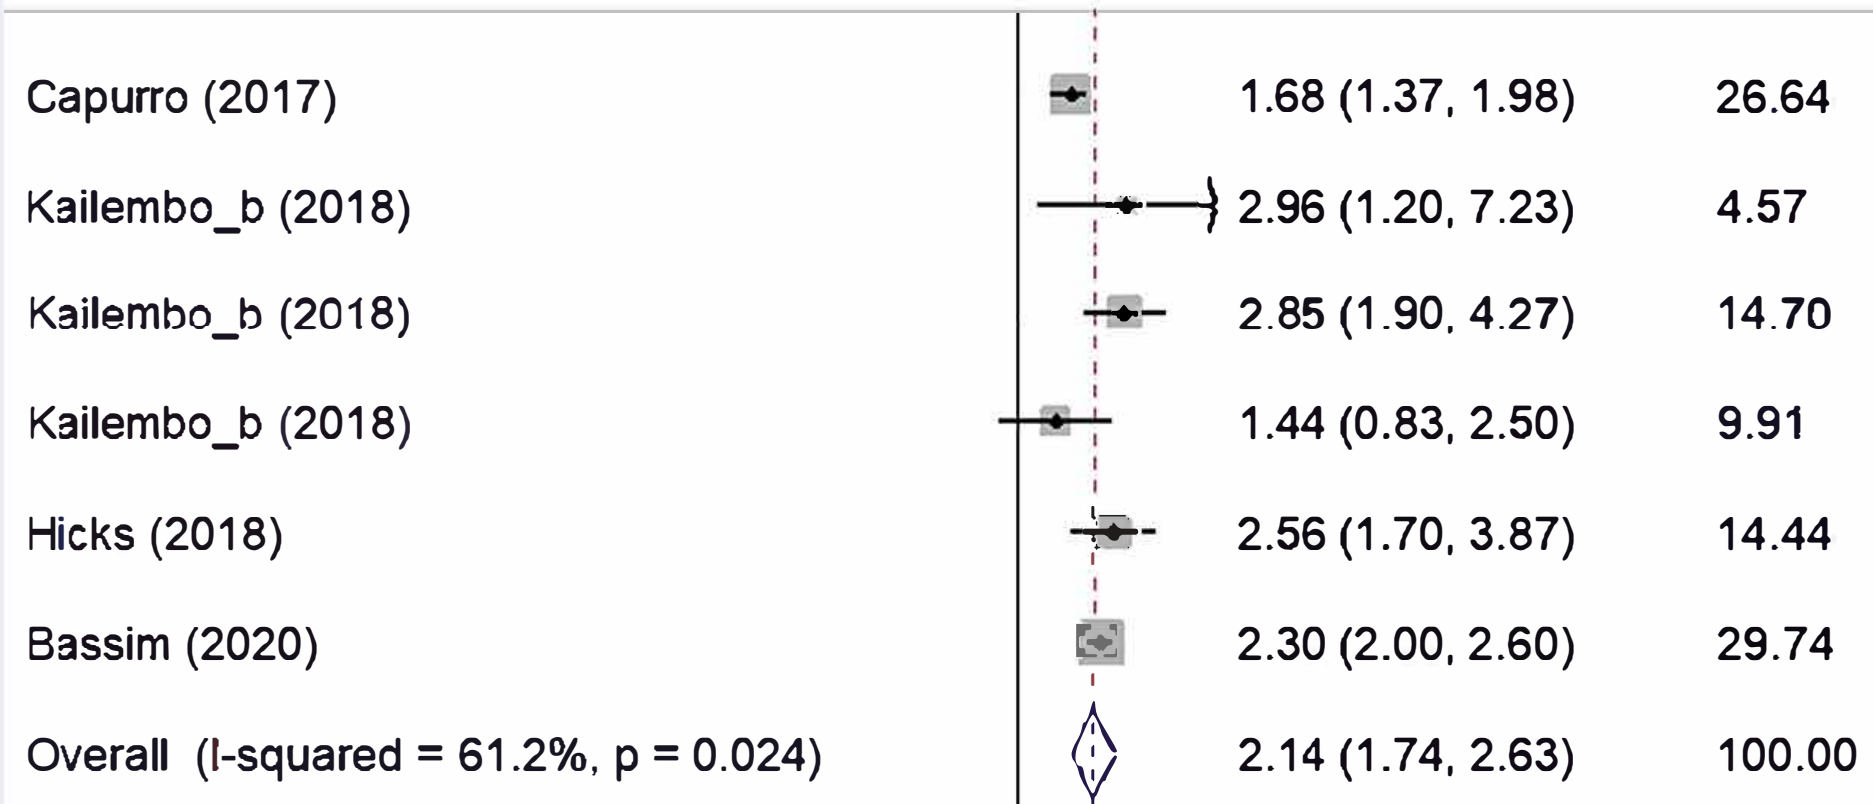

NOTE: Weights are from random effects analysis

.138 1 7.23



# Caries prevalence in prisoners

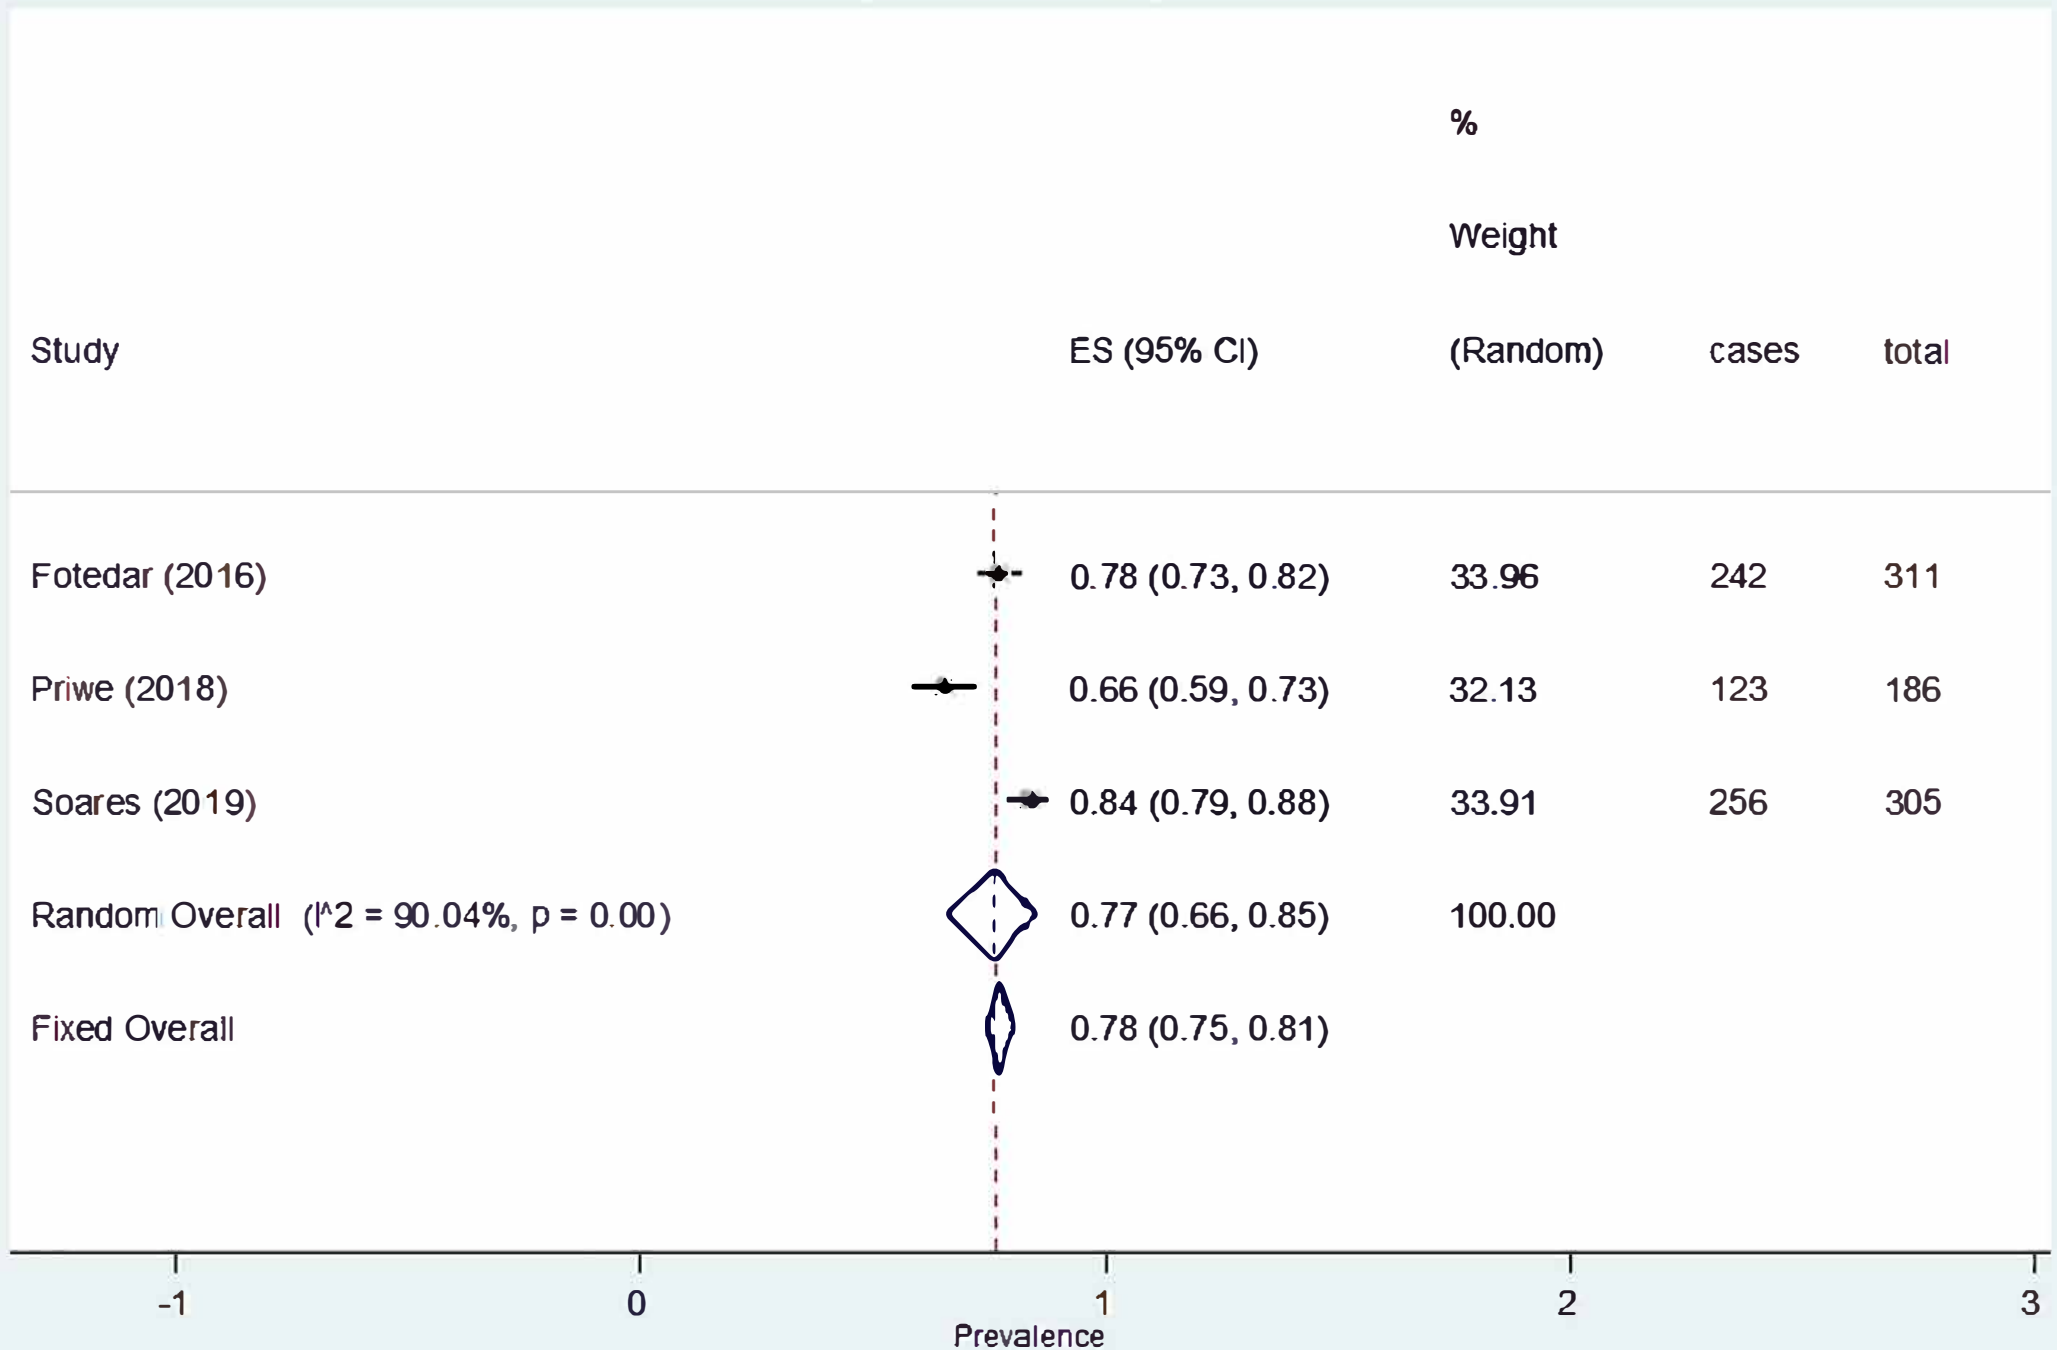

## Gingivitis prevalence in immigrants

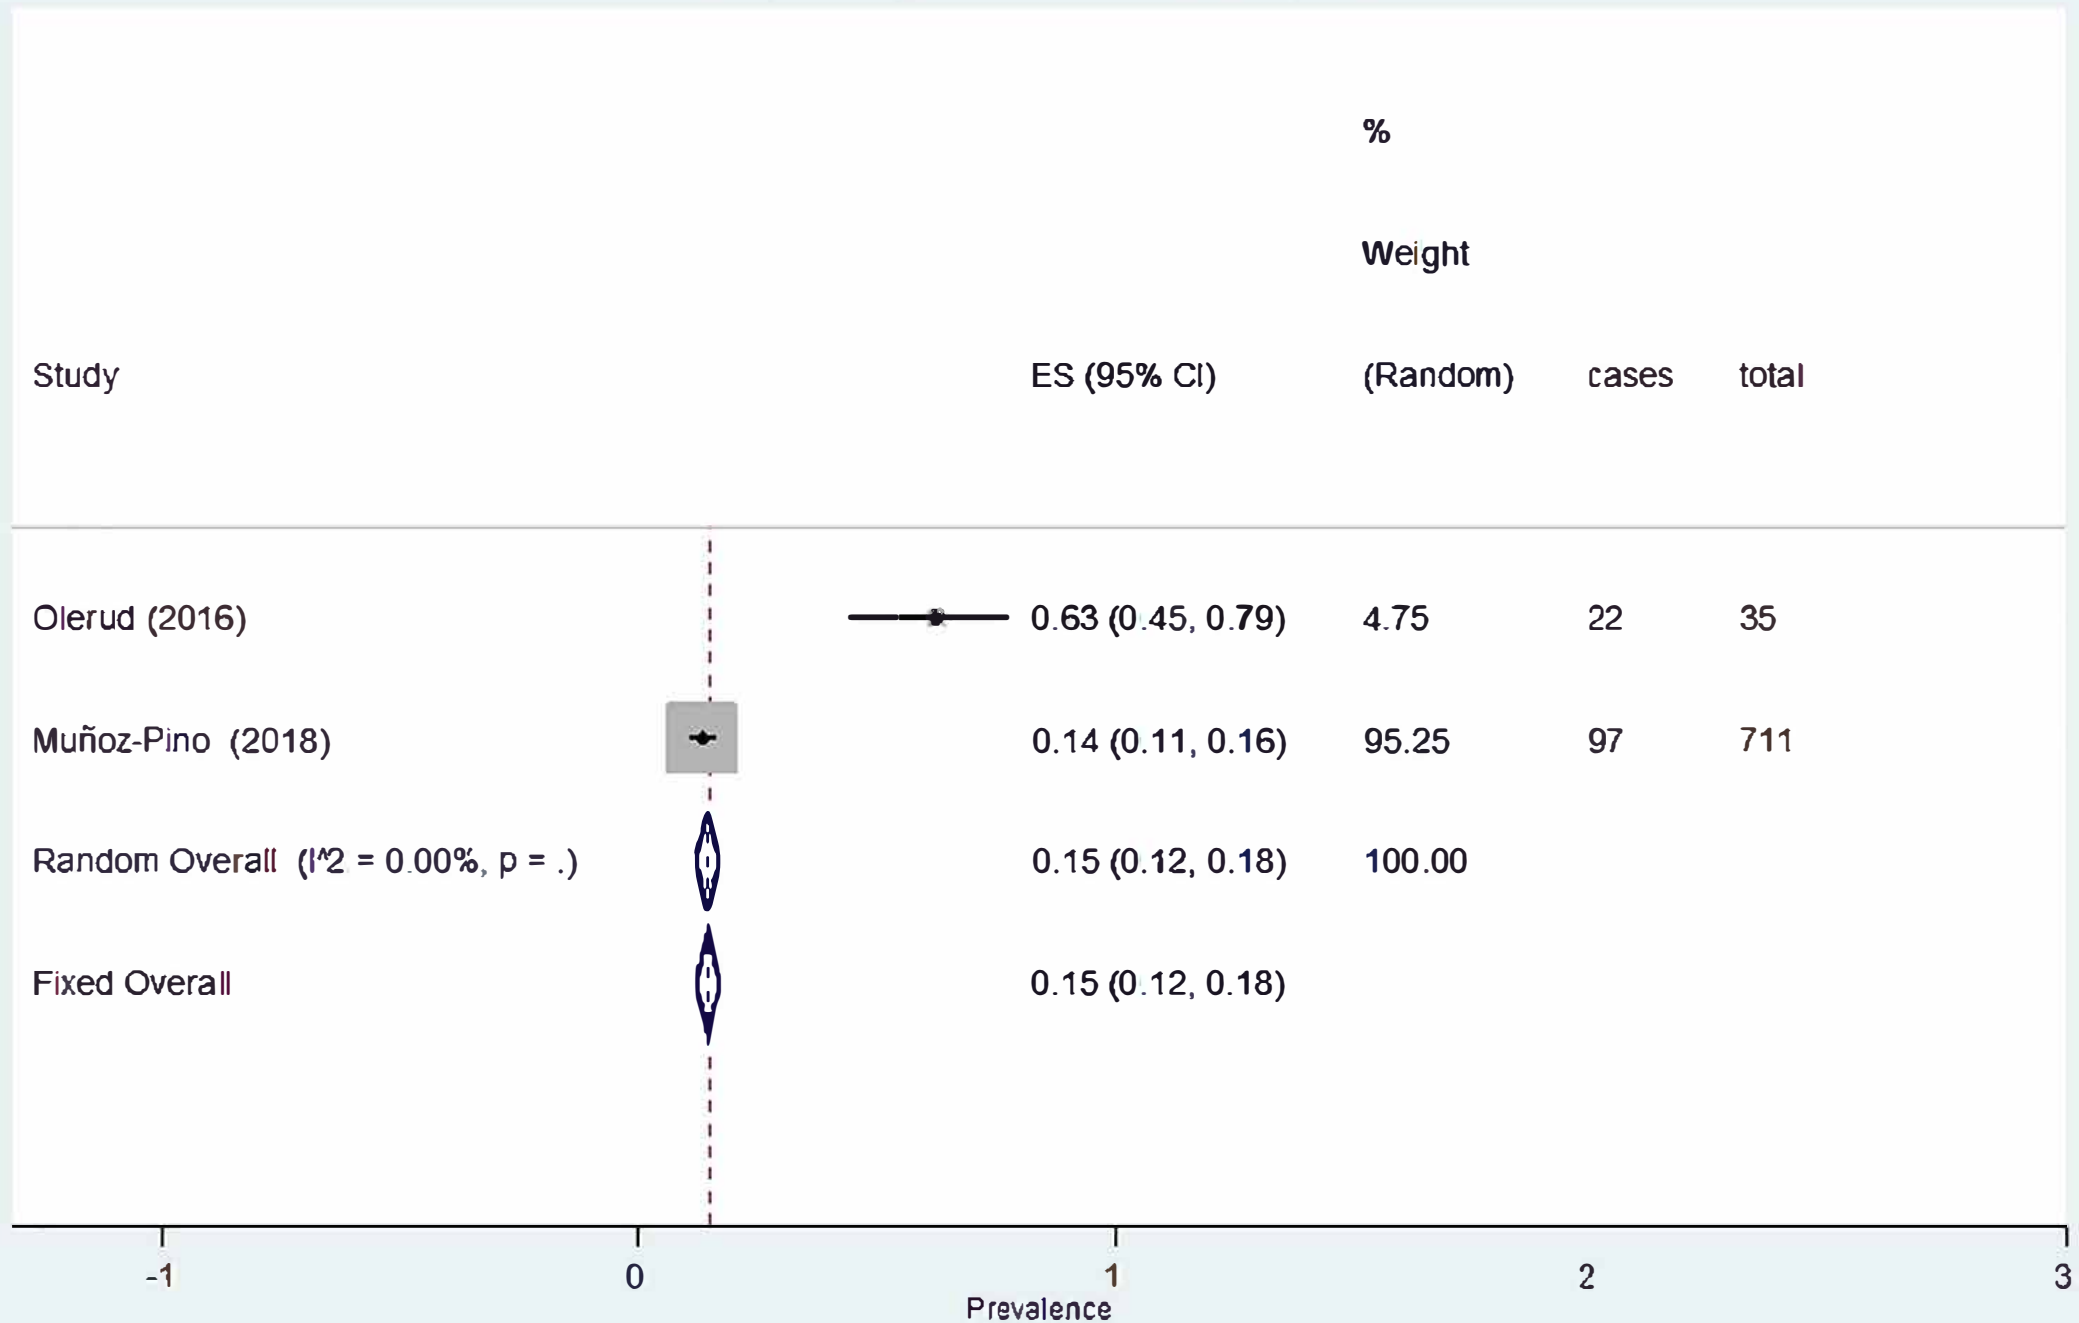

Gingivitis prevalence in low income

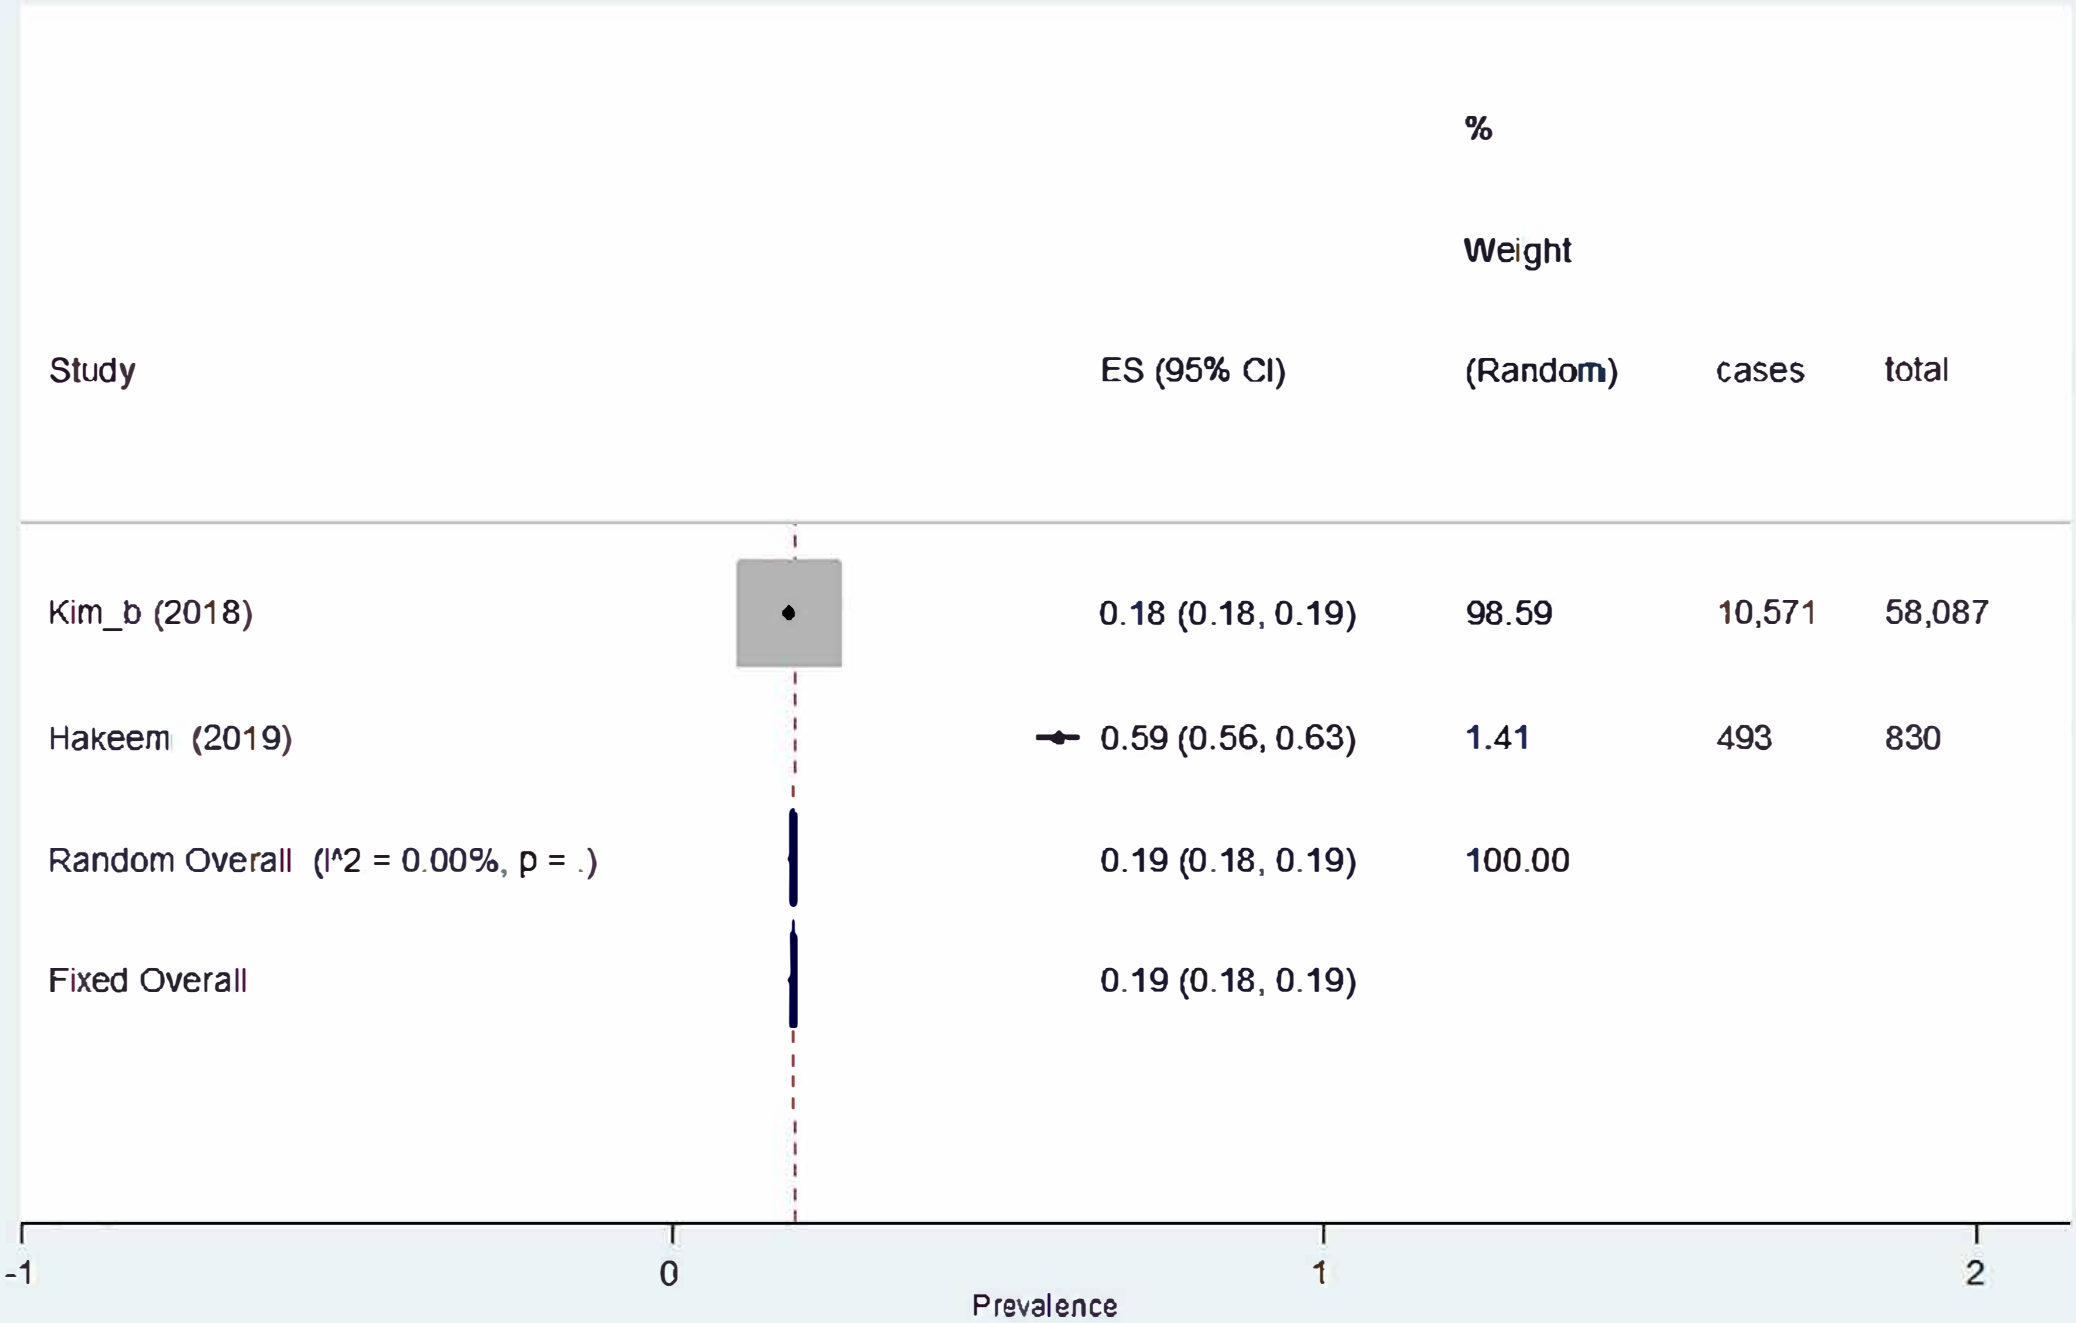

Oral health in low educated people

| Study | %           |        |
|-------|-------------|--------|
| ID    | ES (95% CI) | Weight |

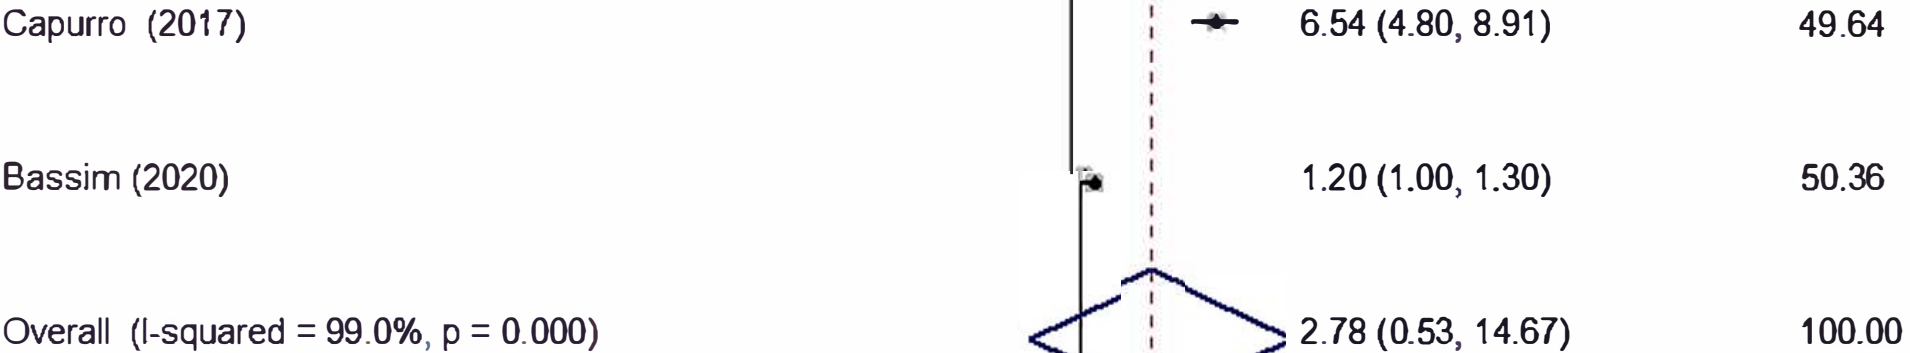

NOTE: Weights are from random effects analysis

# Periodontitis prevalence in immigrants

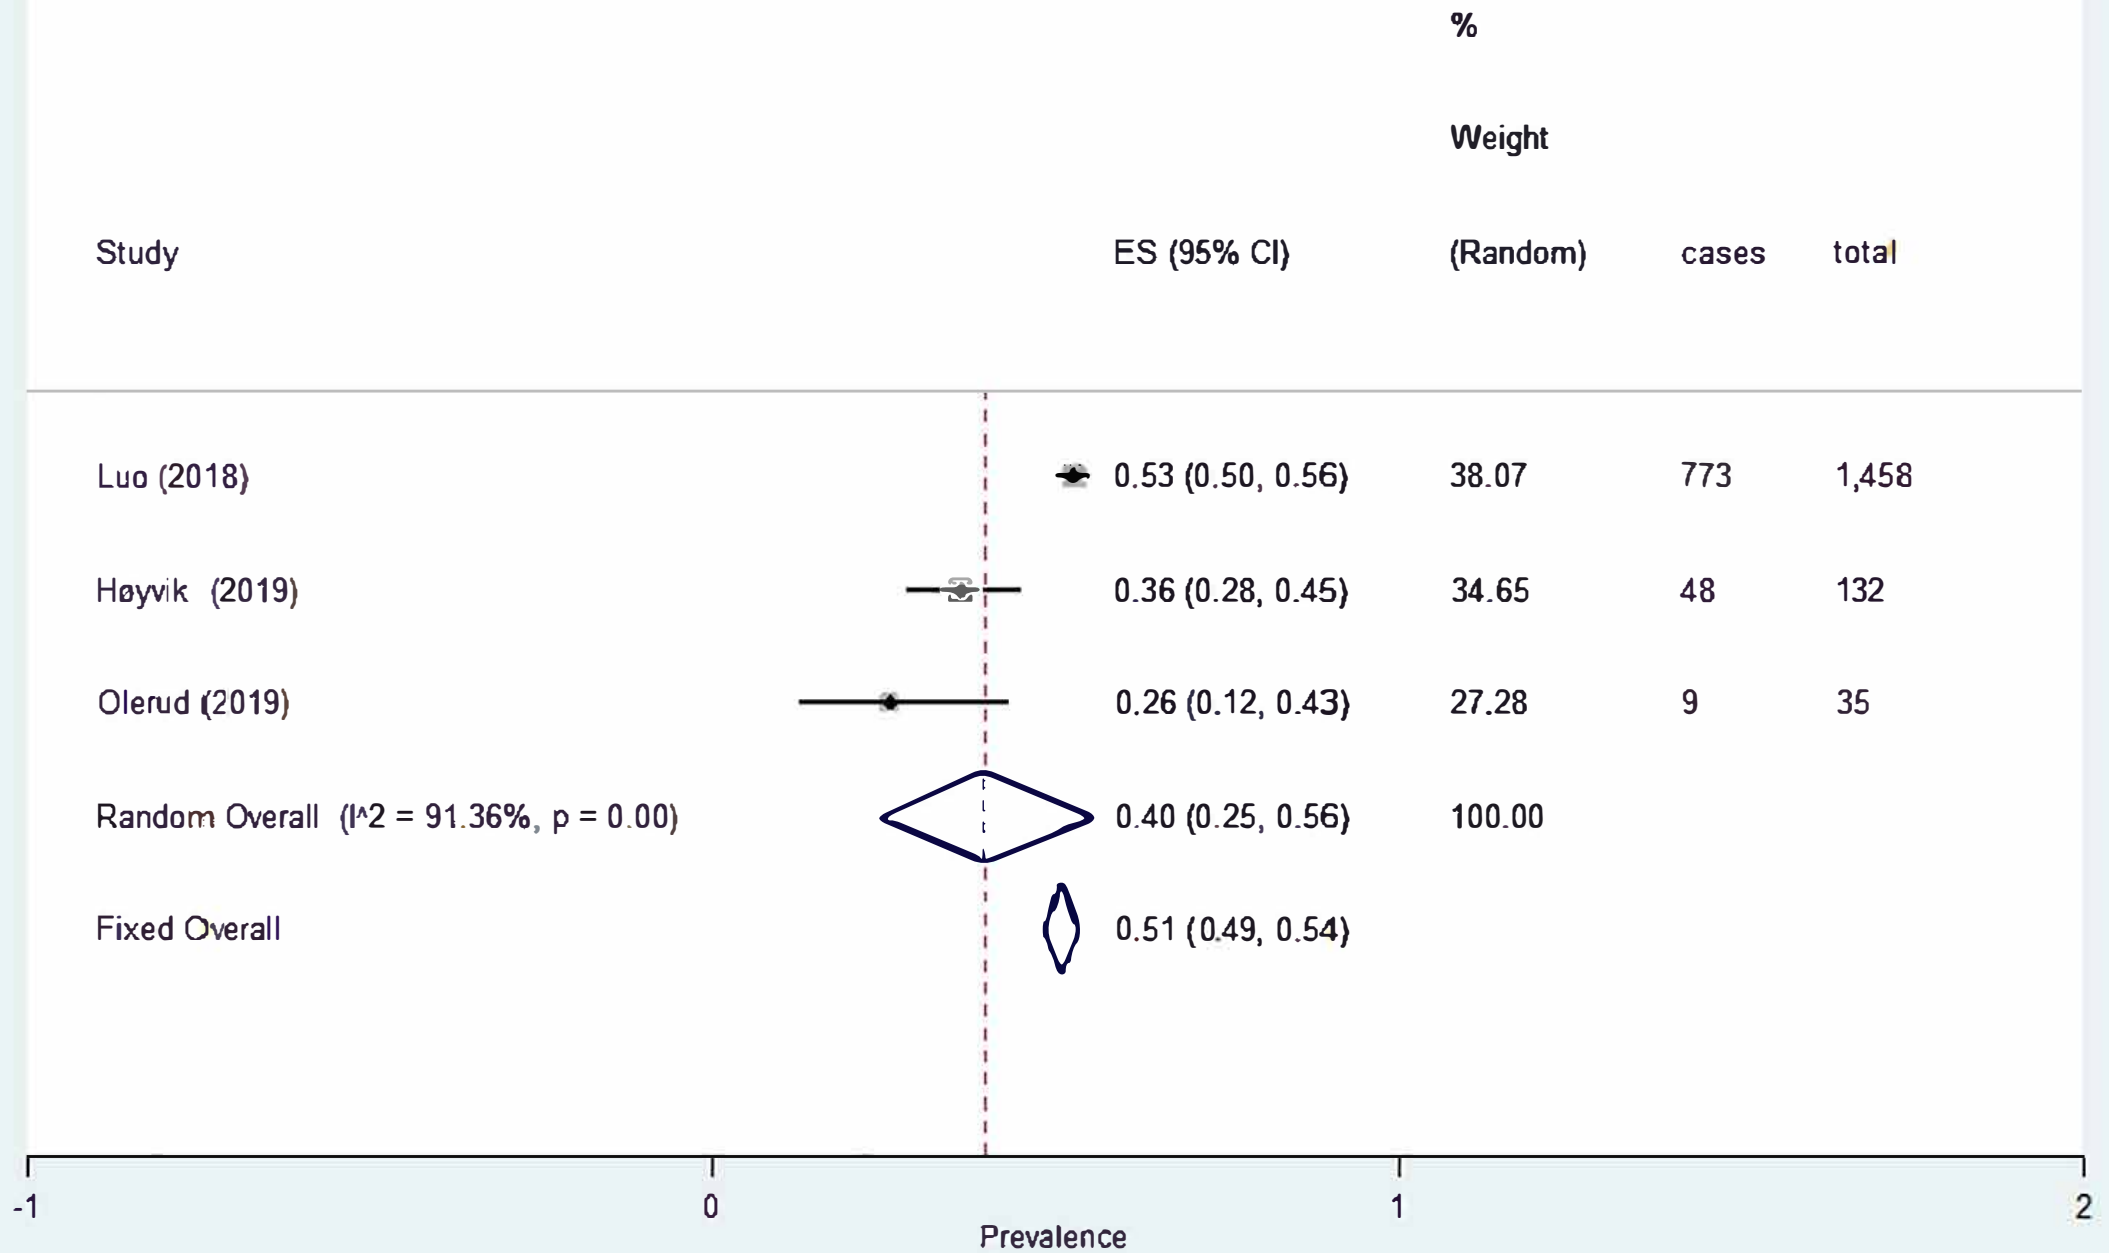

# Periodontitis prevalence in pregnant women

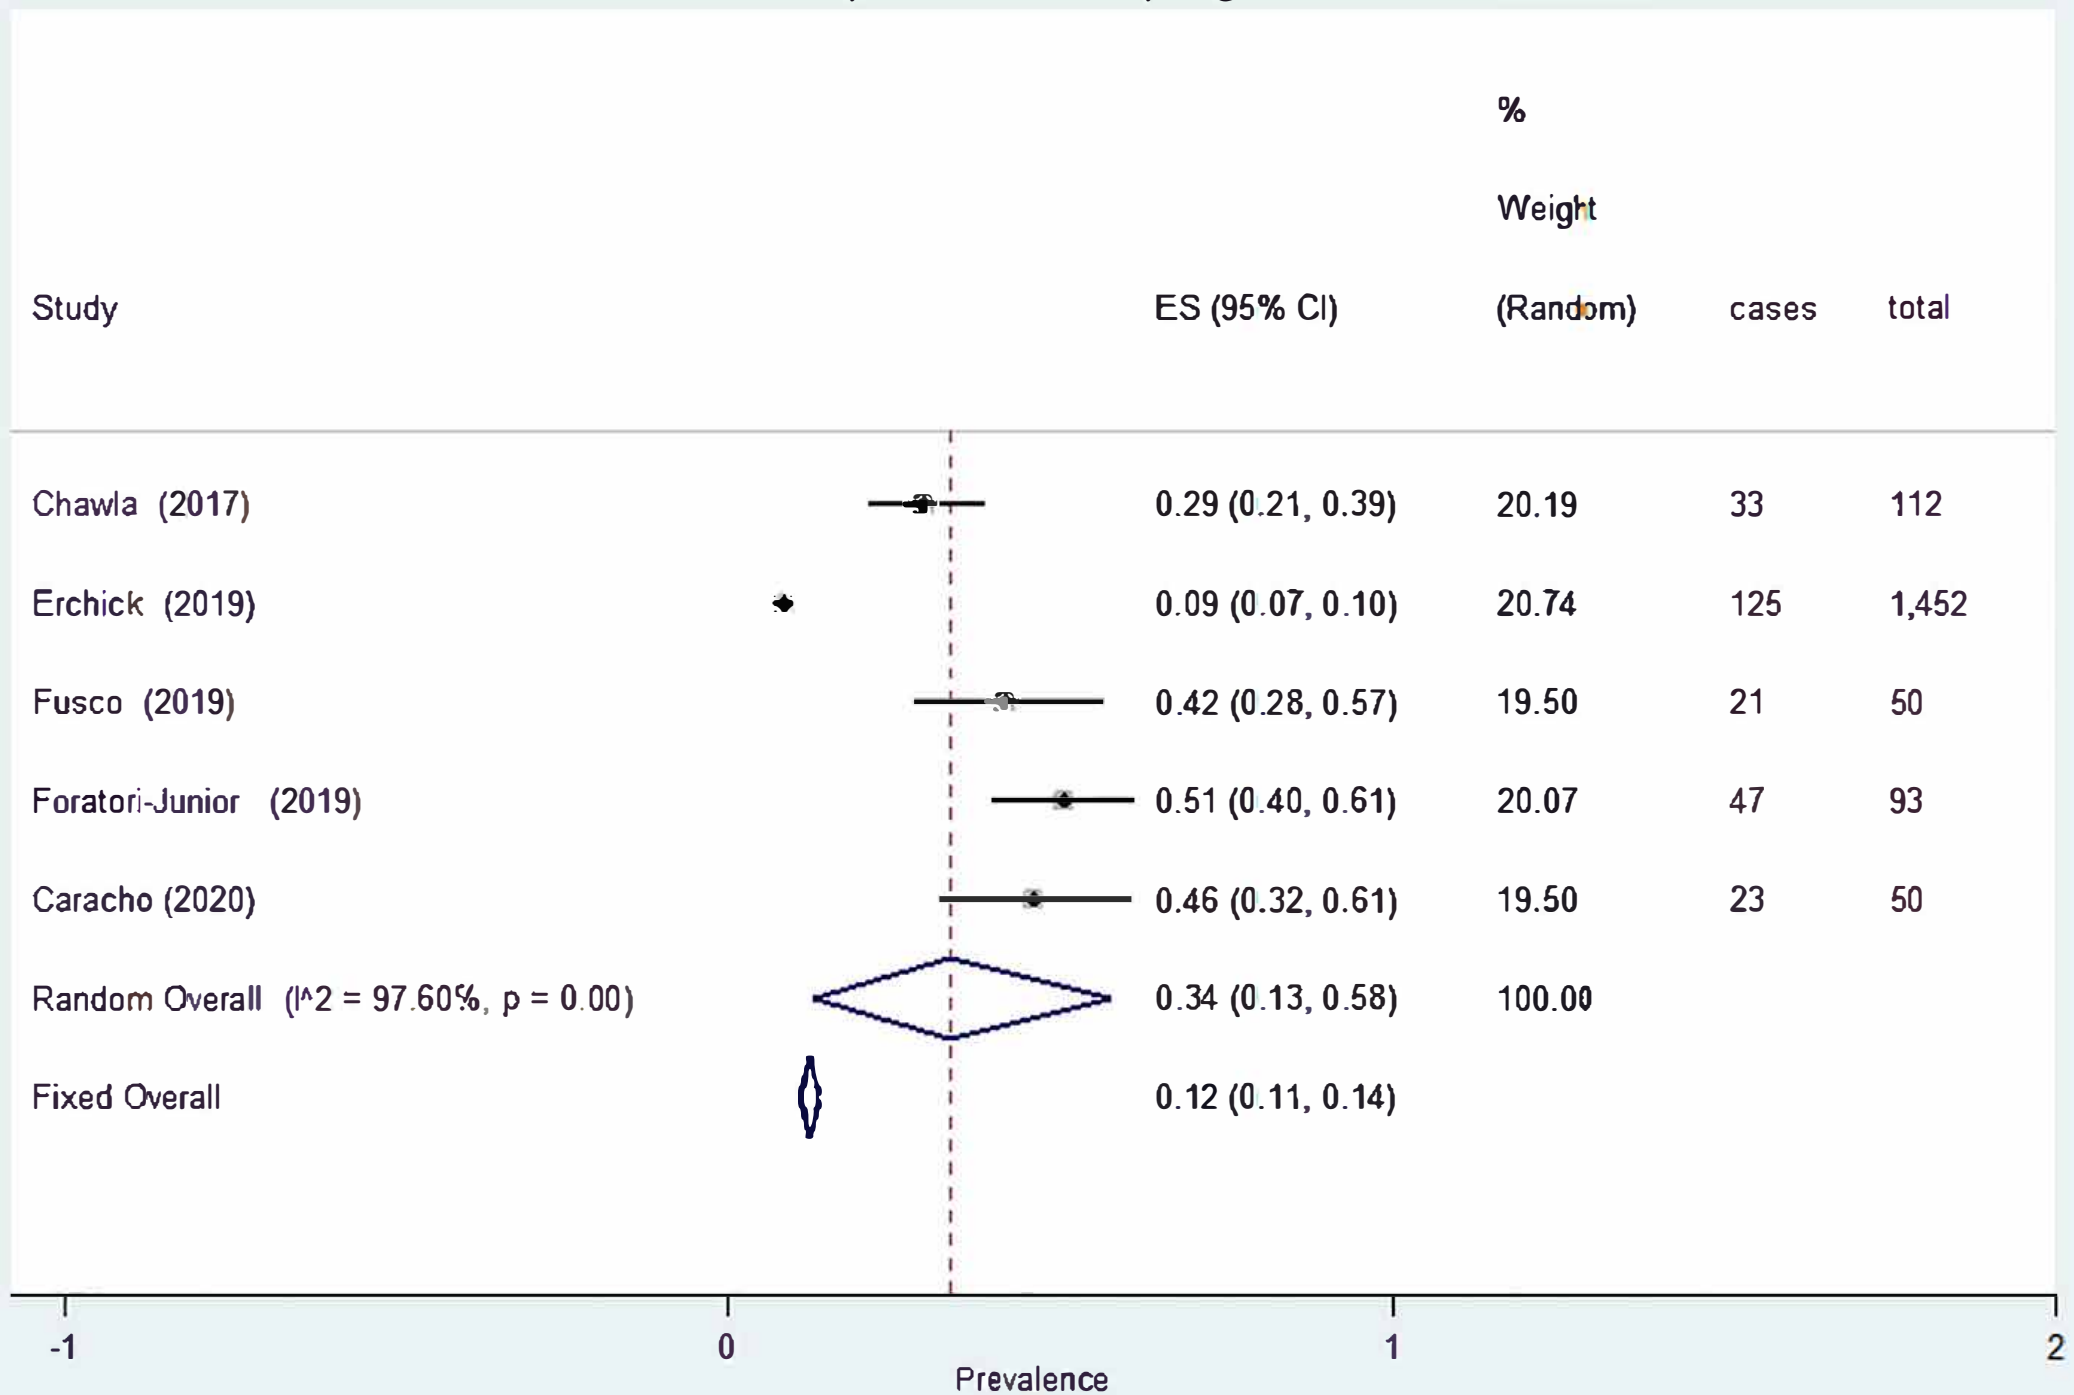

## Service attendance in homeless

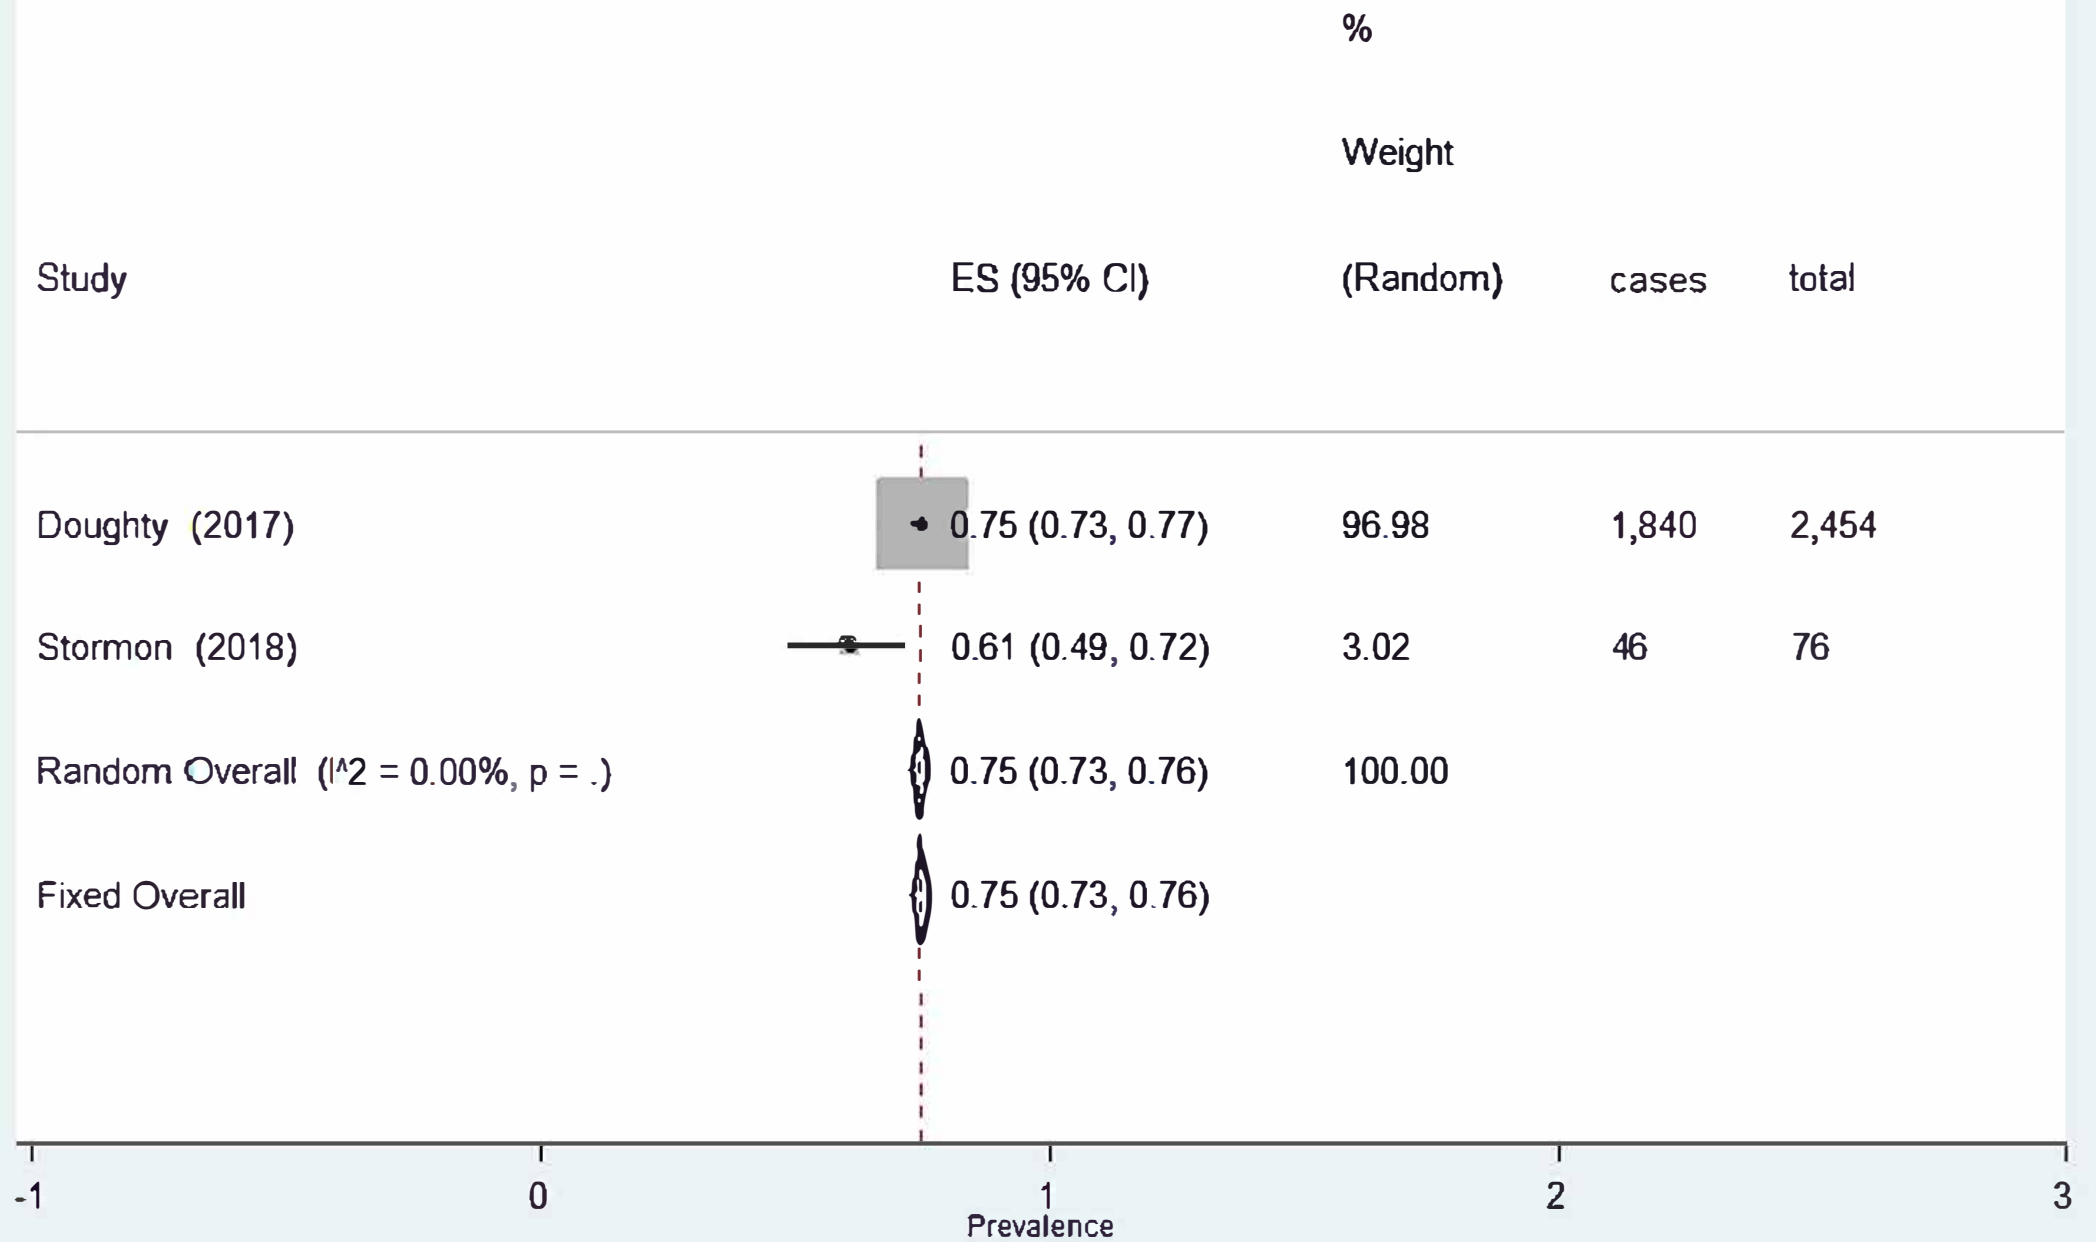

Supplement: s1 [file s1]
