# Supplementary material for: Systematic Review of the Literature on Dental Caries and Periodontal Disease in Socio-Economically Disadvantaged Individuals
Source: MDPI journal article supplement (doi:10.3390/ijerph182312360), 2021-11-24
Supplement: s1 [file s1]

## Quality assessment

## Cross-sectional studies

[illegible]

|                      |     |     |     |     |     |     |     |     |
|----------------------|-----|-----|-----|-----|-----|-----|-----|-----|
| Chae 2017            | yes | yes | yes | yes | no  | no  | yes | yes |
| Chahar 2019          | yes | yes | yes | yes | no  | no  | yes | yes |
| Chalub 2016          | yes |
| Chawla 2017          | yes | yes | yes | yes | no  | no  | yes | yes |
| Chen 2018            | yes | yes | yes | yes | no  | no  | yes | yes |
| Chiesi 2019          | yes | yes | yes | yes | no  | no  | yes | yes |
| Chiu 2017            | yes | yes | yes | yes | no  | no  | yes | yes |
| Choi 2017            | yes |
| Clague 2017          | yes | yes | yes | yes | no  | no  | yes | yes |
| Cocco 2018           | yes | yes | yes | yes | no  | no  | yes | yes |
| Costa 2019           | yes | yes | yes | yes | no  | no  | yes | yes |
| da Veiga Pessoa 2016 | yes | yes | yes | yes | no  | no  | yes | yes |
| Dahl 2018            | yes | yes | yes | yes | no  | no  | yes | yes |
| De Visschere 2016    | yes | yes | yes | yes | no  | no  | yes | yes |
| De Visschere 2016    | yes | yes | yes | yes | no  | no  | yes | yes |
| Delwel 2018          | yes | yes | yes | yes | no  | no  | yes | yes |
| Doughty 2018         | yes | yes | yes | yes | no  | no  | yes | yes |
| Duijster 2018        | yes |
| El Osta 2018         | yes | yes | yes | yes | no  | no  | yes | yes |
| Elkerdany 2020       | yes | yes | yes | yes | no  | no  | yes | yes |
| Erchick 2019         | yes | yes | yes | yes | no  | no  | yes | yes |
| Fantin 2017          | yes | yes | yes | yes | no  | no  | yes | yes |
| Fotedar 2016         | yes | yes | yes | yes | no  | no  | yes | yes |
| Franciscatto 2020    | yes |
| Furuta 2018          | yes | yes | yes | yes | no  | no  | yes | yes |
| Gao 2018a            | yes | yes | yes | yes | no  | no  | yes | yes |
| Głowacka 2019        | yes | yes | yes | yes | no  | no  | yes | yes |
| Gomes Filho 2019     | yes |
| Goulart Mde 2016     | yes |
| Griffin 2019         | yes | yes | yes | yes | no  | no  | yes | yes |
| Grover 2016          | yes |
| Hach 2019            | yes |

|                    |     |     |     |     |     |     |     |     |
|--------------------|-----|-----|-----|-----|-----|-----|-----|-----|
| Hakeem 2019        | yes |
| Han 2015           | yes | yes | yes | yes | no  | no  | yes | yes |
| Heredia-Ponce 2017 | yes | yes | yes | yes | no  | no  | yes | yes |
| Hicks 2018         | yes |
| Hoeksema 2018      | yes | yes | yes | yes | no  | no  | yes | yes |
| Hoeksema 2017      | yes | yes | yes | yes | no  | no  | yes | yes |
| Hoeksema 2018      | yes | yes | yes | yes | no  | no  | yes | yes |
| Høyvik 2019        | yes | yes | yes | yes | no  | no  | yes | yes |
| Ishikawa 2019      | yes |
| Janssens 2017      | yes | yes | yes | yes | no  | no  | yes | yes |
| Janssens 2017      | yes | yes | yes | yes | no  | no  | yes | yes |
| Janssens 2018      | yes | yes | yes | yes | no  | no  | yes | yes |
| Kailembo 2018      | yes |
| Kateeb 2018        | yes | yes | yes | yes | no  | no  | yes | yes |
| Kato 2018          | yes | yes | yes | yes | no  | no  | yes | yes |
| Kim 2016           | yes |
| Kim 2018           | yes | yes | yes | yes | no  | no  | yes | yes |
| Klotz 2020         | yes | yes | yes | yes | no  | no  | yes | yes |
| Laguzzi 2016       | yes | yes | yes | yes | no  | no  | yes | yes |
| Lambert 2018       | yes |
| Lee 2016           | yes |
| Lee 2018           | yes | yes | yes | yes | no  | no  | yes | yes |
| León 2016          | yes | yes | yes | yes | no  | no  | yes | yes |
| Llena 2019         | yes | yes | yes | yes | no  | no  | yes | yes |
| Maille 2017        | yes | yes | yes | yes | no  | no  | yes | yes |
| Maille 2019        | yes | yes | yes | yes | no  | no  | yes | yes |
| Marques 2015       | yes | yes | yes | yes | no  | no  | yes | yes |
| Martin 2017        | yes | yes | yes | yes | no  | no  | yes | yes |
| Matsuyama 2019     | yes | yes | yes | yes | no  | no  | yes | yes |
| Mehr 2018          | yes | yes | yes | yes | no  | no  | yes | yes |
| Mejia 2018         | yes | yes | yes | yes | no  | no  | yes | yes |
| Mochida 2018       | yes | yes | yes | yes | no  | no  | yes | yes |

|                 |     |     |     |     |     |     |     |     |
|-----------------|-----|-----|-----|-----|-----|-----|-----|-----|
| Monaghan 2017   | yes | yes | yes | yes | no  | no  | yes | yes |
| Mulic 2020      | yes | yes | yes | yes | no  | no  | yes | yes |
| Muñoz-Pino 2018 | yes | yes | yes | yes | no  | no  | yes | yes |
| Nakahori 2019   | yes | yes | yes | yes | no  | no  | yes | yes |
| Naorungroj 2017 | yes | yes | yes | yes | no  | no  | yes | yes |
| Nielsen 2016    | yes | yes | yes | yes | no  | no  | yes | yes |
| Nielsen 2017    | yes | yes | yes | yes | no  | no  | yes | yes |
| Nihtilä 2017    | yes | yes | yes | yes | no  | no  | yes | yes |
| Nilsson 2018    | yes | yes | yes | yes | no  | no  | yes | yes |
| Nogueira 2019   | yes |
| Nouaman 2015    | yes | yes | yes | yes | no  | no  | yes | yes |
| Novrinda 2019   | yes | yes | yes | yes | no  | no  | yes | yes |
| Okamoto 2019    | Yes | yes | yes | yes | no  | no  | yes | yes |
| Olerud 2016     | Yes | yes | yes | yes | no  | no  | yes | yes |
| Olerud 2016     | Yes | yes | yes | yes | no  | no  | yes | yes |
| Piotrowska 2020 | Yes |
| Priwe 2018      | Yes | yes | yes | yes | no  | no  | yes | yes |
| Puturidze 2019  | Yes | yes | yes | yes | no  | no  | yes | yes |
| Rafat 2020      | Yes | yes | yes | yes | no  | no  | yes | yes |
| Ramsay 2015     | Yes | yes | yes | yes | no  | no  | yes | yes |
| Ramsay 2018     | Yes |
| Rao 2017        | Yes | yes | yes | yes | no  | no  | yes | yes |
| Rekhi 2016      | Yes | yes | yes | yes | no  | no  | yes | yes |
| Rekhi 2018      | Yes | yes | yes | yes | no  | no  | yes | yes |
| Ribeiro 2016    | Yes | yes | yes | yes | no  | no  | yes | yes |
| Roberto 2020    | Yes |
| Rodriguez 2017  | Yes |
| Rommel 2016     | Yes | yes | yes | yes | no  | no  | yes | yes |
| Rosa 2020       | Yes | yes | yes | yes | no  | no  | yes | yes |
| Rosa 2020       | Yes | yes | yes | yes | no  | no  | yes | yes |
| Rota 2019       | Yes | yes | yes | yes | no  | no  | yes | yes |
| Rouxel 2015     | Yes |

|                             |     |     |     |     |     |     |     |     |
|-----------------------------|-----|-----|-----|-----|-----|-----|-----|-----|
| Sáez-Prado 2016             | Yes | yes | yes | yes | no  | no  | yes | yes |
| Saintrain 2018              | Yes | yes | yes | yes | no  | no  | yes | yes |
| Saito 2019                  | Yes | yes | yes | yes | no  | no  | yes | yes |
| Sato 2018                   | Yes |
| Schwindling 2018            | Yes | yes | yes | yes | no  | no  | yes | yes |
| Sheng 2018                  | Yes | yes | yes | yes | no  | no  | yes | yes |
| Shetty 2015                 | Yes |
| Shim 2018                   | Yes |
| Silva 2018                  | Yes | yes | yes | yes | no  | no  | yes | yes |
| Singh 2016                  | Yes | yes | yes | yes | no  | no  | yes | yes |
| Singh 2016                  | yes | yes | yes | yes | no  | no  | yes | yes |
| Skośkiewicz-Malinowska 2016 | yes | yes | yes | yes | no  | no  | yes | yes |
| Soares 2019                 | yes | yes | yes | yes | no  | no  | yes | yes |
| Song 2016                   | yes | yes | yes | yes | no  | no  | yes | yes |
| Sordi 2017                  | yes | yes | yes | yes | no  | no  | yes | yes |
| Souza 2018                  | yes | yes | yes | yes | no  | no  | yes | yes |
| Srisilapanan 2016           | yes | yes | yes | yes | no  | no  | yes | yes |
| Srivastava 2017             | yes |
| Steele 2015                 | yes | yes | yes | yes | no  | no  | yes | yes |
| Stormon 2018                | yes | yes | yes | yes | no  | no  | yes | yes |
| Sun 2016                    | yes | yes | yes | yes | no  | no  | yes | yes |
| Suzuki 2016                 | yes |
| Tafere 2018                 | yes |
| Tapias Perdigon 2019        | yes | yes | yes | yes | no  | no  | yes | yes |
| Tiwari 2016                 | yes | yes | yes | yes | no  | no  | yes | yes |
| Umer 2016                   | yes | yes | yes | yes | no  | no  | yes | yes |
| Valdez 2020                 | yes | yes | yes | yes | no  | no  | yes | yes |
| Wang 2017                   | yes | yes | yes | yes | no  | no  | yes | yes |
| Wang 2017                   | yes | yes | yes | yes | no  | no  | yes | yes |
| Weintraub 2019              | yes |
| Wennström 2015              | yes | yes | yes | yes | no  | no  | yes | yes |
| Wilson 2018                 | yes |

|                |     |     |     |     |     |     |     |     |
|----------------|-----|-----|-----|-----|-----|-----|-----|-----|
| Wright 2017    | yes | yes | yes | yes | no  | no  | yes | yes |
| Wright 2018    | yes | yes | yes | yes | no  | no  | yes | yes |
| Xhihani 2017   | yes | yes | yes | yes | no  | no  | yes | yes |
| Ye 2018        | yes | yes | yes | yes | no  | no  | yes | yes |
| Yoon 2018      | yes | yes | yes | yes | no  | no  | yes | yes |
| Yoshino 2016   | yes |
| Yoshino 2017   | yes |
| Zhang 2016b    | yes | yes | yes | yes | no  | no  | yes | yes |
| Zhang_a 2016   | yes | yes | yes | yes | no  | no  | yes | yes |
| Ziebolz 2017   | yes | yes | yes | yes | no  | no  | yes | yes |
| Zimmerman 2017 | yes | yes | yes | yes | no  | no  | yes | yes |
| Zusman 2016    | yes | yes | yes | yes | no  | no  | yes | yes |

## Cohort studies

| Author/s and years    | Item 1: Population and groups recruitment | Item 2: Exposure similarity measures (exposed/unexposed groups) | Item 3: Exposure measurements | Item 4: Confounding factors identification | Item 5: Strategies to deal with confounding factors | Item 6: No outcome at the moment of exposure | Item 7: Outcomes measurements | Item 8: Appropriate follow-up | Item 9: Follow-up completeness | Item 10: Strategies to address incomplete follow up | Item 11: Statistical analysis |
|-----------------------|-------------------------------------------|-----------------------------------------------------------------|-------------------------------|--------------------------------------------|-----------------------------------------------------|----------------------------------------------|-------------------------------|-------------------------------|--------------------------------|-----------------------------------------------------|-------------------------------|
| Beker 2019            | yes                                       | yes                                                             | yes                           | no                                         | no                                                  | yes                                          | yes                           | yes                           | yes                            | yes                                                 | yes                           |
| Castrejón-Pérez 2017a | yes                                       | yes                                                             | yes                           | no                                         | no                                                  | yes                                          | yes                           | yes                           | yes                            | yes                                                 | yes                           |
| Costa 2016            | yes                                       | yes                                                             | yes                           | no                                         | no                                                  | yes                                          | yes                           | yes                           | yes                            | yes                                                 | yes                           |
| DeLia 2016            | yes                                       | yes                                                             | yes                           | no                                         | no                                                  | yes                                          | yes                           | yes                           | yes                            | yes                                                 | yes                           |
| Freiberg 2020         | yes                                       | yes                                                             | yes                           | no                                         | no                                                  | yes                                          | yes                           | yes                           | yes                            | yes                                                 | yes                           |
| Laniado 2020          | yes                                       | yes                                                             | yes                           | no                                         | no                                                  | yes                                          | yes                           | yes                           | yes                            | yes                                                 | yes                           |
| Lee 2019              | yes                                       | yes                                                             | yes                           | yes                                        | yes                                                 | yes                                          | yes                           | yes                           | yes                            | yes                                                 | yes                           |
| Rampa 2016            | yes                                       | yes                                                             | yes                           | yes                                        | yes                                                 | yes                                          | yes                           | yes                           | yes                            | yes                                                 | yes                           |
| Rio 2020              | yes                                       | yes                                                             | yes                           | no                                         | no                                                  | yes                                          | yes                           | yes                           | yes                            | yes                                                 | yes                           |

## Case control studies

| Author/s and years    | Item 1: Groups comparability other than presence/absence of disease | Item 2: Cases and controls matching | Item 3: Cases/controls criteria identification | Item 4: Exposure measurements | Item 5: Procedure similarity for cases and controls | Item 6: Confounding factors identification | Item 7: Strategies to deal with confounding factors | Item 8: Outcomes assessments | Item 9: Appropriate exposure period | Item 10: Statistical analysis |
|-----------------------|---------------------------------------------------------------------|-------------------------------------|------------------------------------------------|-------------------------------|-----------------------------------------------------|--------------------------------------------|-----------------------------------------------------|------------------------------|-------------------------------------|-------------------------------|
| Gao 2018b             | yes                                                                 | yes                                 | yes                                            | yes                           | yes                                                 | no                                         | no                                                  | yes                          | yes                                 | yes                           |
| Gao 2020              | yes                                                                 | yes                                 | yes                                            | yes                           | yes                                                 | no                                         | no                                                  | yes                          | yes                                 | yes                           |
| Manicone 2017         | yes                                                                 | yes                                 | yes                                            | yes                           | yes                                                 | no                                         | no                                                  | yes                          | yes                                 | yes                           |
| Martínez-Beneyto 2019 | yes                                                                 | yes                                 | yes                                            | yes                           | yes                                                 | no                                         | no                                                  | yes                          | yes                                 | yes                           |
