# Supplementary material for: Systematic Review of the Literature on Dental Caries and Periodontal Disease in Socio-Economically Disadvantaged Individuals
Source: Int J Environ Res Public Health. 2021 Nov 24;18(23):12360. doi: 10.3390/ijerph182312360 (PMC8656978; doi:10.3390/ijerph182312360)
Supplement: Supplementary file 1 [file ijerph-18-12360-s001.zip]

Archive with 4 entries (4 files):
- Supplementary Figure S1.pdf
- Supplementary Table S1.pdf
- Supplementary Table S2.pdf
- Supplementary Table S3 PRISMA_2020_checklist.pdf
